# Supplementary material for: Trends in Burdens of Disease by Transmission Source (USA, 2005–2020) and Hazard Identification for Foods: Focus on Milkborne Disease
Source: PubMed Central journal article supplement (PMC11442898; doi:10.1007/s44197-024-00216-6), 2024-03-28
Supplement: 44197_2024_216_MOESM1_ESM.pdf [file 44197_2024_216_MOESM1_ESM.pdf]

## 1. SUPPLEMENTAL INFORMATION

### 1.1. Information on NORS database tables and relationships

The major NORS database tables and relationships used for this analysis are depicted below: NORSMain; 5 tables on food; 3 tables on water; and a table each on etiology, symptoms, and animal contact. The tables are linked by the unique identifier CDCID.

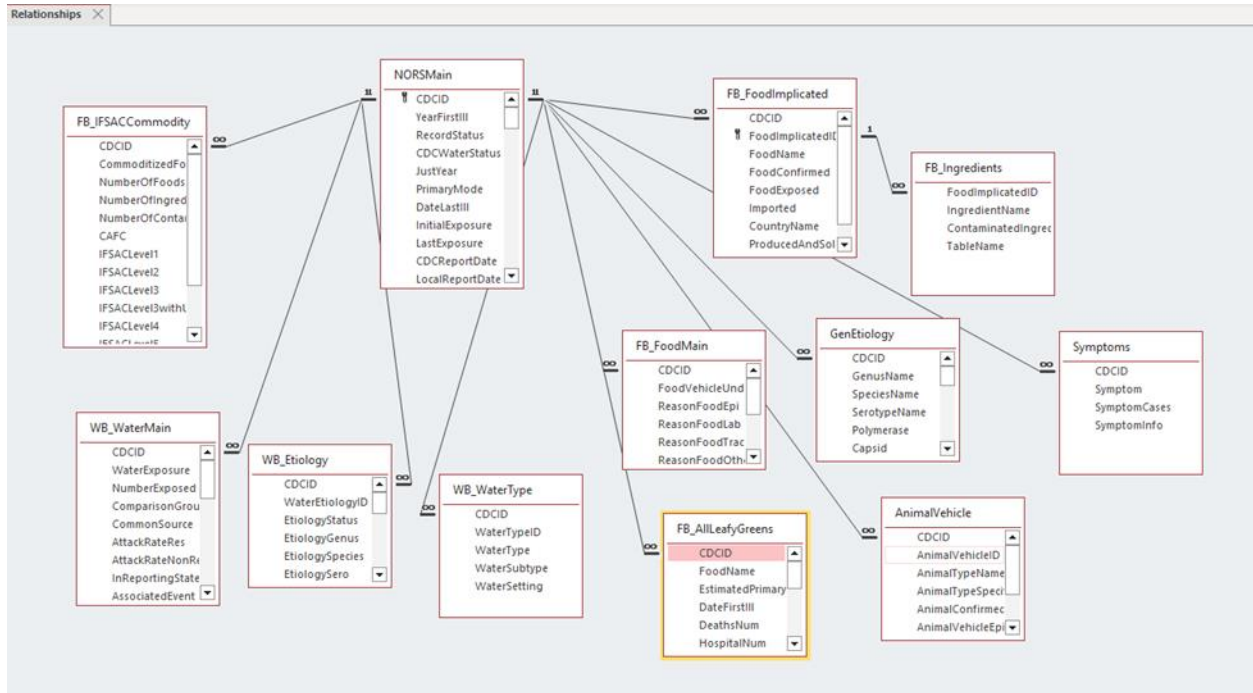

Fig. S1 NORS database tables used in this analysis and their relationships.

## 1.2 Time-Series Trends in Outbreak, Illness, Hospitalization Rates Associated with Raw Milk

Figures S2, S3, and S4 show bar charts of illness, outbreak, and hospitalization rates, respectively, as a function of time and grouped by state.

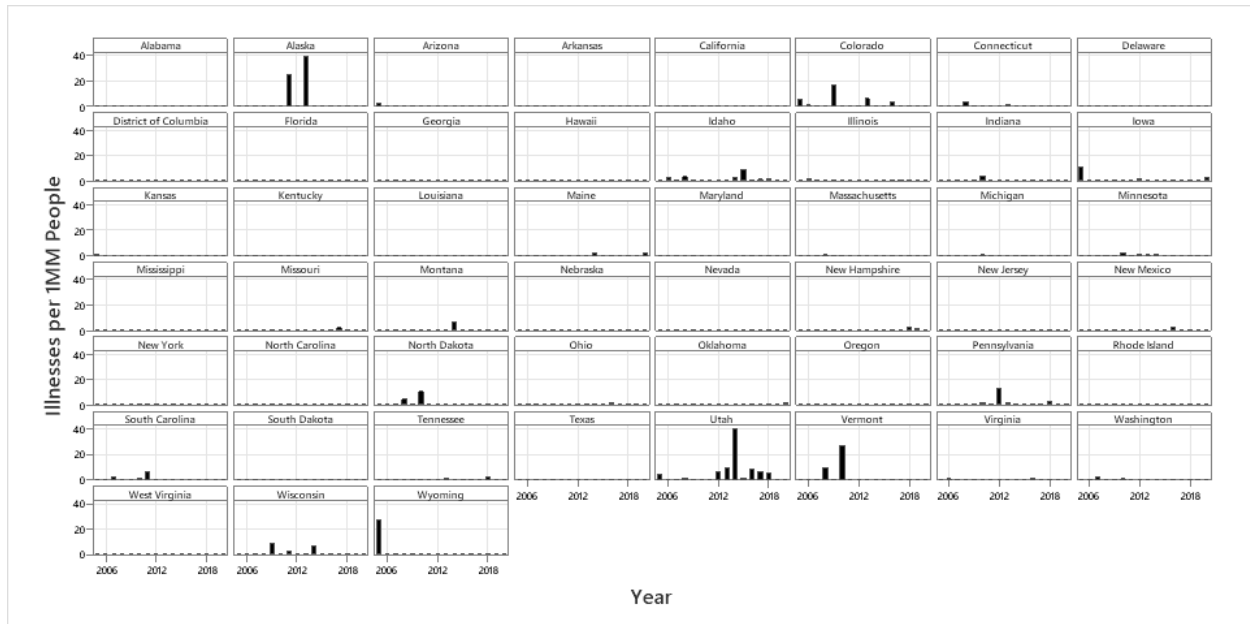

**Fig. S2.** State-level bar charts of raw milk-related illness incidence rates (illnesses per 1MM people) on the y-axis as a function of time (year) on the x-axis.

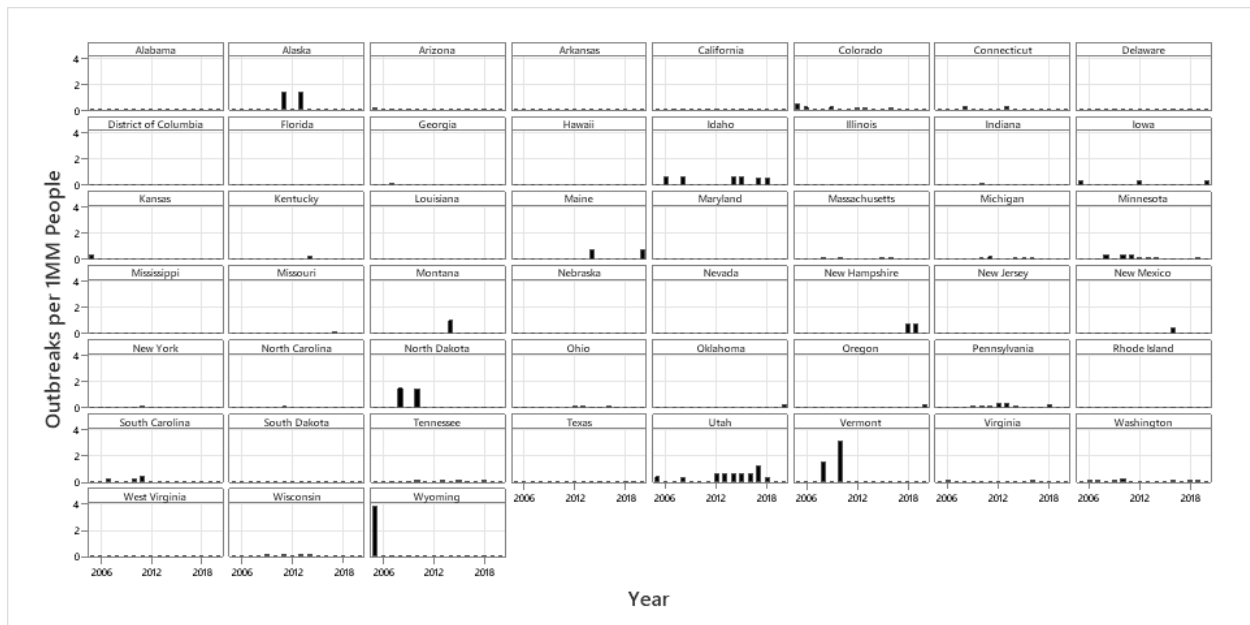

**Fig. S3.** State-level bar charts of raw milk-related outbreak incidence rates (outbreaks per 1MM people) on the y-axis as a function of time (year) on the x-axis.

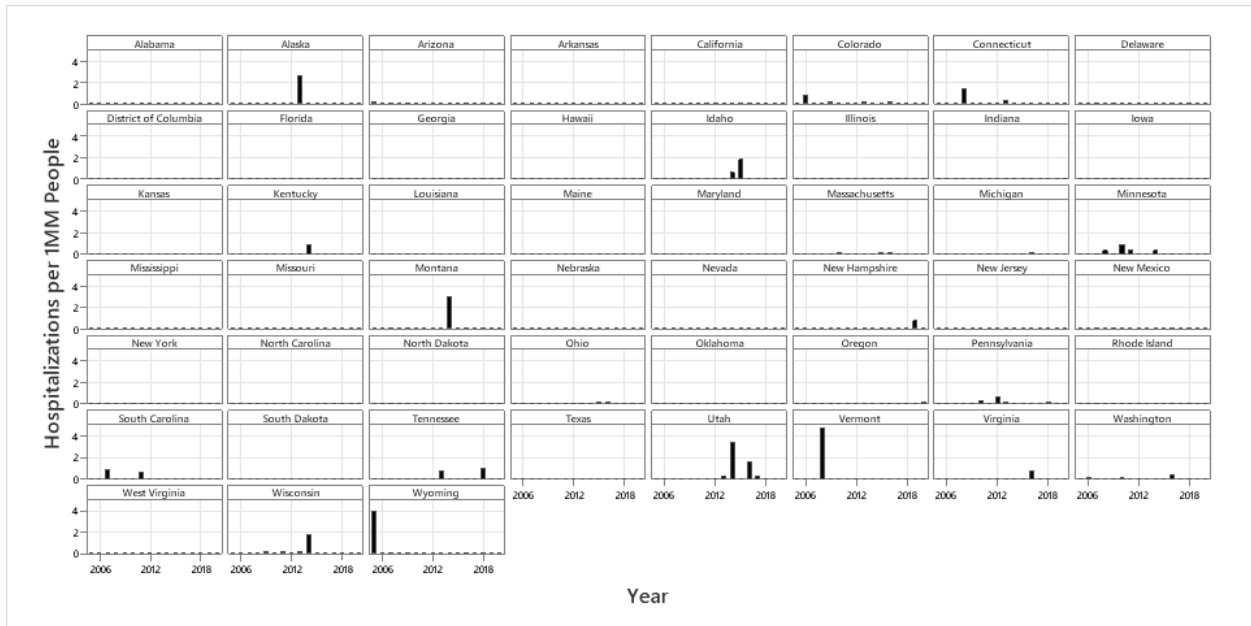

**Fig. S4.** State-level bar charts of raw milk-related hospitalization incidence rates (hospitalizations per 1MM people) on the y-axis as a function of time (year) on the x-axis.

### 1.3 Time-Series Trends in Legal Status and Registrations for Raw Milk

Figures S5 and S6 show the time-series trends in legal status. Only nine of the 50 states observed a switch in legal status somewhere between 2005 and 2020 (Kentucky, Maryland, Michigan, Montana, North Dakota, Ohio, Tennessee, West Virginia, and Wyoming) according to Definition 1 (only “I” is illegal). Under Definition 2, Maryland did not switch legal status and North Carolina switched legal status (from “P” to “H” in 2018). Fig. S6 shows the time-series trends in the number of new registrations issued each year for the seven states (California, Colorado, Maine, Massachusetts, New York, Texas, and Utah) that responded to Freedom of Information Act (FOIA) requests.

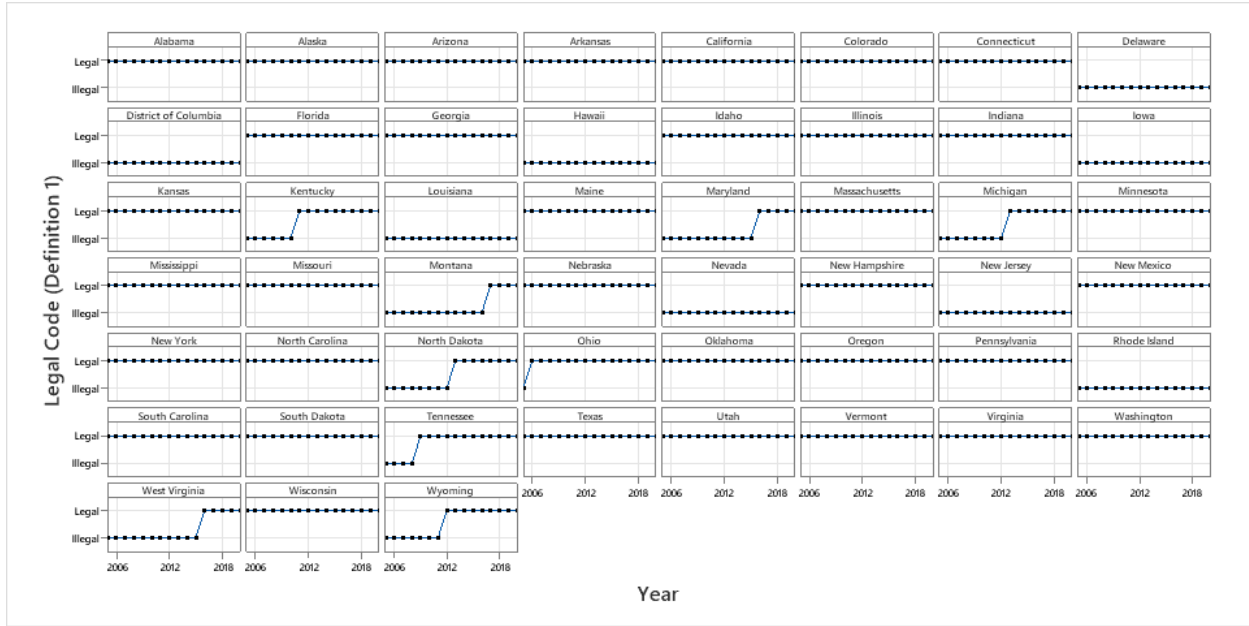

**Fig. S5.** State-level scatterplots of binary legal status (0=Illegal, 1=Legal) on the y-axis as a function of time (year) on the x-axis. The legal code classification uses Definition 1 (only “I” is illegal).

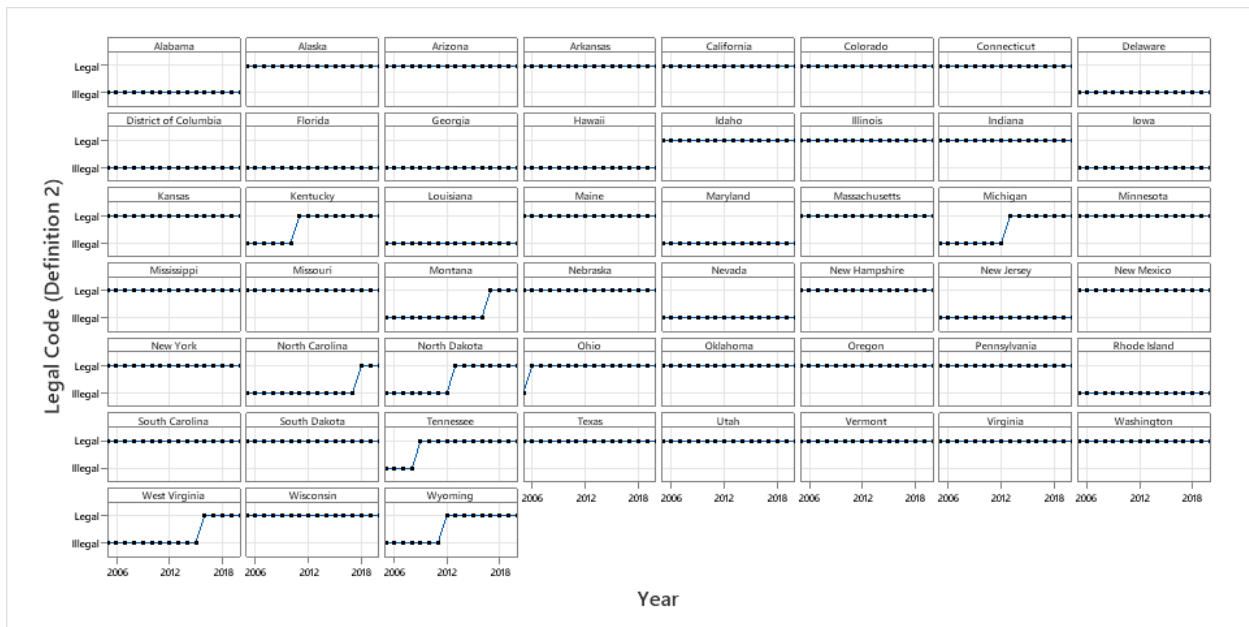

**Fig. S6.** State-level scatterplots of binary legal status (0=Illegal, 1=Legal) on the y-axis as a function of time (year) on the x-axis. The legal code classification uses Definition 2 (“I” or “P” illegal).

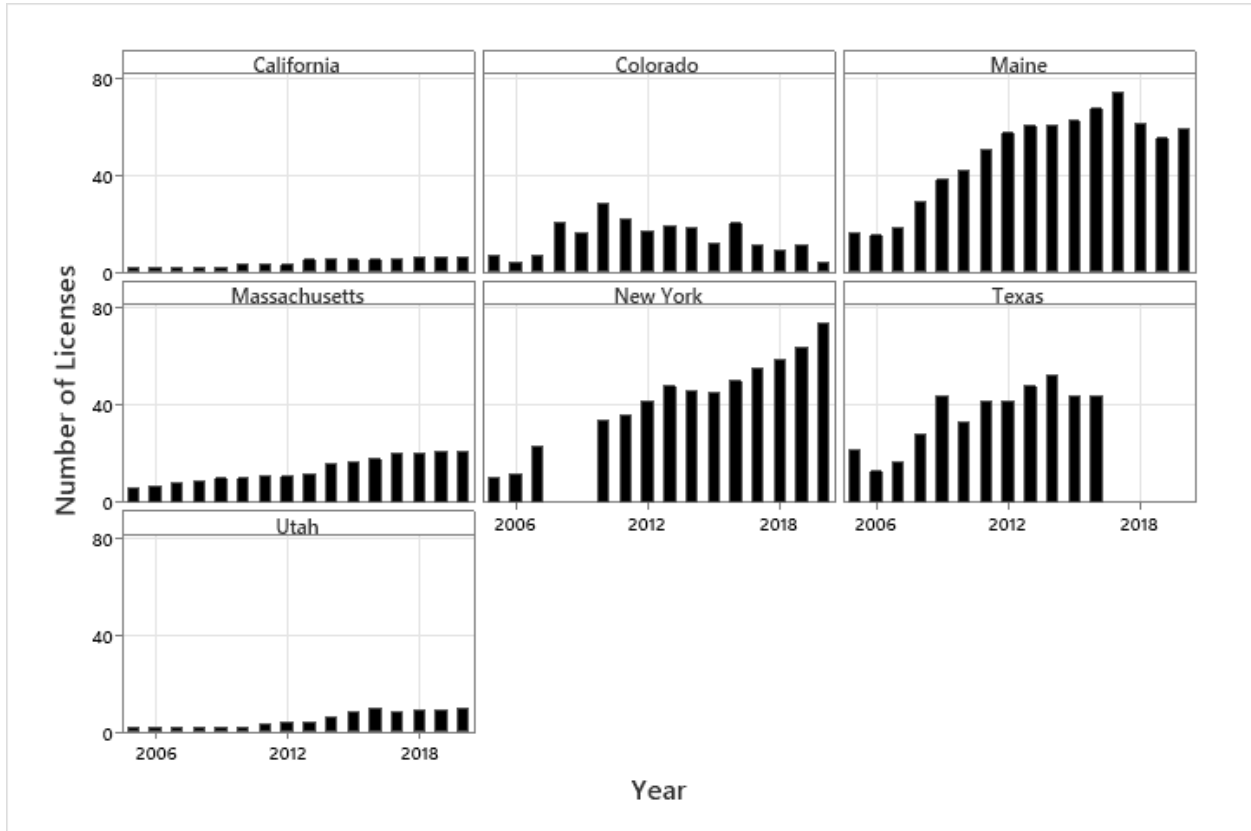

**Fig. S7.** State-level bar charts of number of licenses/permits issued on the y-axis as a function of time (year) on the x-axis for the seven states (California, Colorado, Maine, Massachusetts, New York, Texas, and Utah) that responded to Freedom of Information Act (FOIA) requests for the number of new raw milk licenses (registrations) issued each year from 2005 to 2020. Data were not available for New York in years 2008 and 2009, or Texas from 2017 to 2022.

## 1.4. Supporting Tables

## Trends in Burdens of Disease and Hazard Identification

**Table S1.** Data table of raw milk-related outbreaks, illnesses, hospitalizations, and deaths in the United States for the years 2005-2020. The data table combines the raw milk-related outbreaks, illnesses, and hospitalizations, U.S. census populations for each state and year (state-year) (see Section 2.3), state legal classifications by state-year (see Section 2.4), and the reported numbers of licenses/permits issued to dairies approved to sell raw milk (see Section 2.4). The outbreak, illness, and hospitalization counts in each year were expressed as rates per one million persons, i.e., outbreaks/1MM, illnesses/1MM, and hospitalizations/1MM, respectively. Many of the cells under “Number Licenses” are blank (missing data) due to us not having the information for 43 of the 50 states. The data table was then used as input to the statistical analysis.

| State   | Year | Population | Legal Class | Def 1 | Def 2   | Number Licenses | Outbreaks | Illnesses | Hospitalizations | Deaths | Outbreak Rate Per 1MM | Illnesses Rate Per 1MM | Hospitalization Rate Per 1MM |
|---------|------|------------|-------------|-------|---------|-----------------|-----------|-----------|------------------|--------|-----------------------|------------------------|------------------------------|
| Alabama | 2005 | 4,569,805  | P           | Legal | Illegal |                 | 0         | 0         | 0                | 0      | 0.000                 | 0.000                  | 0.000                        |
| Alabama | 2006 | 4,628,981  | P           | Legal | Illegal |                 | 0         | 0         | 0                | 0      | 0.000                 | 0.000                  | 0.000                        |
| Alabama | 2007 | 4,672,840  | P           | Legal | Illegal |                 | 0         | 0         | 0                | 0      | 0.000                 | 0.000                  | 0.000                        |
| Alabama | 2008 | 4,718,206  | P           | Legal | Illegal |                 | 0         | 0         | 0                | 0      | 0.000                 | 0.000                  | 0.000                        |
| Alabama | 2009 | 4,757,938  | P           | Legal | Illegal |                 | 0         | 0         | 0                | 0      | 0.000                 | 0.000                  | 0.000                        |
| Alabama | 2010 | 4,785,514  | P           | Legal | Illegal |                 | 0         | 0         | 0                | 0      | 0.000                 | 0.000                  | 0.000                        |
| Alabama | 2011 | 4,799,642  | P           | Legal | Illegal |                 | 0         | 0         | 0                | 0      | 0.000                 | 0.000                  | 0.000                        |
| Alabama | 2012 | 4,816,632  | P           | Legal | Illegal |                 | 0         | 0         | 0                | 0      | 0.000                 | 0.000                  | 0.000                        |
| Alabama | 2013 | 4,831,586  | P           | Legal | Illegal |                 | 0         | 0         | 0                | 0      | 0.000                 | 0.000                  | 0.000                        |
| Alabama | 2014 | 4,843,737  | P           | Legal | Illegal |                 | 0         | 0         | 0                | 0      | 0.000                 | 0.000                  | 0.000                        |
| Alabama | 2015 | 4,854,803  | P           | Legal | Illegal |                 | 0         | 0         | 0                | 0      | 0.000                 | 0.000                  | 0.000                        |
| Alabama | 2016 | 4,866,824  | P           | Legal | Illegal |                 | 0         | 0         | 0                | 0      | 0.000                 | 0.000                  | 0.000                        |
| Alabama | 2017 | 4,877,989  | P           | Legal | Illegal |                 | 0         | 0         | 0                | 0      | 0.000                 | 0.000                  | 0.000                        |
| Alabama | 2018 | 4,891,628  | P           | Legal | Illegal |                 | 0         | 0         | 0                | 0      | 0.000                 | 0.000                  | 0.000                        |
| Alabama | 2019 | 4,907,965  | P           | Legal | Illegal |                 | 0         | 0         | 0                | 0      | 0.000                 | 0.000                  | 0.000                        |
| Alabama | 2020 | 5,031,362  | P           | Legal | Illegal |                 | 0         | 0         | 0                | 0      | 0.000                 | 0.000                  | 0.000                        |
| Alaska  | 2005 | 666,946    | H           | Legal | Legal   |                 | 0         | 0         | 0                | 0      | 0.000                 | 0.000                  | 0.000                        |
| Alaska  | 2006 | 675,302    | H           | Legal | Legal   |                 | 0         | 0         | 0                | 0      | 0.000                 | 0.000                  | 0.000                        |
| Alaska  | 2007 | 680,300    | H           | Legal | Legal   |                 | 0         | 0         | 0                | 0      | 0.000                 | 0.000                  | 0.000                        |
| Alaska  | 2008 | 687,455    | H           | Legal | Legal   |                 | 0         | 0         | 0                | 0      | 0.000                 | 0.000                  | 0.000                        |
| Alaska  | 2009 | 698,895    | H           | Legal | Legal   |                 | 0         | 0         | 0                | 0      | 0.000                 | 0.000                  | 0.000                        |
| Alaska  | 2010 | 713,982    | H           | Legal | Legal   |                 | 0         | 0         | 0                | 0      | 0.000                 | 0.000                  | 0.000                        |
| Alaska  | 2011 | 722,349    | H           | Legal | Legal   |                 | 1         | 18        | 0                | 0      | 1.384                 | 24.919                 | 0.000                        |
| Alaska  | 2012 | 730,810    | H           | Legal | Legal   |                 | 0         | 0         | 0                | 0      | 0.000                 | 0.000                  | 0.000                        |
| Alaska  | 2013 | 737,626    | H           | Legal | Legal   |                 | 1         | 29        | 2                | 0      | 1.356                 | 39.315                 | 2.711                        |
| Alaska  | 2014 | 737,075    | H           | Legal | Legal   |                 | 0         | 0         | 0                | 0      | 0.000                 | 0.000                  | 0.000                        |
| Alaska  | 2015 | 738,430    | H           | Legal | Legal   |                 | 0         | 0         | 0                | 0      | 0.000                 | 0.000                  | 0.000                        |

| State    | Year | Population | Legal Class | Def 1 | Def 2 | Number Licenses | Outbreaks | Illnesses | Hospitalizations | Deaths | Outbreak Rate Per 1MM | Illnesses Rate Per 1MM | Hospitalization Rate Per 1MM |
|----------|------|------------|-------------|-------|-------|-----------------|-----------|-----------|------------------|--------|-----------------------|------------------------|------------------------------|
| Alaska   | 2016 | 742,575    | H           | Legal | Legal |                 | 0         | 0         | 0                | 0      | 0.000                 | 0.000                  | 0.000                        |
| Alaska   | 2017 | 740,983    | H           | Legal | Legal |                 | 0         | 0         | 0                | 0      | 0.000                 | 0.000                  | 0.000                        |
| Alaska   | 2018 | 736,624    | H           | Legal | Legal |                 | 0         | 0         | 0                | 0      | 0.000                 | 0.000                  | 0.000                        |
| Alaska   | 2019 | 733,603    | H           | Legal | Legal |                 | 0         | 0         | 0                | 0      | 0.000                 | 0.000                  | 0.000                        |
| Alaska   | 2020 | 732,923    | H           | Legal | Legal |                 | 0         | 0         | 0                | 0      | 0.000                 | 0.000                  | 0.000                        |
| Arizona  | 2005 | 5,839,077  | R           | Legal | Legal |                 | 1         | 13        | 1                | 0      | 0.171                 | 2.226                  | 0.171                        |
| Arizona  | 2006 | 6,029,141  | R           | Legal | Legal |                 | 0         | 0         | 0                | 0      | 0.000                 | 0.000                  | 0.000                        |
| Arizona  | 2007 | 6,167,681  | R           | Legal | Legal |                 | 0         | 0         | 0                | 0      | 0.000                 | 0.000                  | 0.000                        |
| Arizona  | 2008 | 6,280,362  | R           | Legal | Legal |                 | 0         | 0         | 0                | 0      | 0.000                 | 0.000                  | 0.000                        |
| Arizona  | 2009 | 6,343,154  | R           | Legal | Legal |                 | 0         | 0         | 0                | 0      | 0.000                 | 0.000                  | 0.000                        |
| Arizona  | 2010 | 6,407,342  | R           | Legal | Legal |                 | 0         | 0         | 0                | 0      | 0.000                 | 0.000                  | 0.000                        |
| Arizona  | 2011 | 6,473,416  | R           | Legal | Legal |                 | 0         | 0         | 0                | 0      | 0.000                 | 0.000                  | 0.000                        |
| Arizona  | 2012 | 6,556,344  | R           | Legal | Legal |                 | 0         | 0         | 0                | 0      | 0.000                 | 0.000                  | 0.000                        |
| Arizona  | 2013 | 6,634,690  | R           | Legal | Legal |                 | 0         | 0         | 0                | 0      | 0.000                 | 0.000                  | 0.000                        |
| Arizona  | 2014 | 6,732,873  | R           | Legal | Legal |                 | 0         | 0         | 0                | 0      | 0.000                 | 0.000                  | 0.000                        |
| Arizona  | 2015 | 6,832,810  | R           | Legal | Legal |                 | 0         | 0         | 0                | 0      | 0.000                 | 0.000                  | 0.000                        |
| Arizona  | 2016 | 6,944,767  | R           | Legal | Legal |                 | 0         | 0         | 0                | 0      | 0.000                 | 0.000                  | 0.000                        |
| Arizona  | 2017 | 7,048,088  | R           | Legal | Legal |                 | 0         | 0         | 0                | 0      | 0.000                 | 0.000                  | 0.000                        |
| Arizona  | 2018 | 7,164,228  | R           | Legal | Legal |                 | 0         | 0         | 0                | 0      | 0.000                 | 0.000                  | 0.000                        |
| Arizona  | 2019 | 7,291,843  | R           | Legal | Legal |                 | 0         | 0         | 0                | 0      | 0.000                 | 0.000                  | 0.000                        |
| Arizona  | 2020 | 7,179,943  | R           | Legal | Legal |                 | 0         | 0         | 0                | 0      | 0.000                 | 0.000                  | 0.000                        |
| Arkansas | 2005 | 2,781,097  | F           | Legal | Legal |                 | 0         | 0         | 0                | 0      | 0.000                 | 0.000                  | 0.000                        |
| Arkansas | 2006 | 2,821,761  | F           | Legal | Legal |                 | 0         | 0         | 0                | 0      | 0.000                 | 0.000                  | 0.000                        |
| Arkansas | 2007 | 2,848,650  | F           | Legal | Legal |                 | 0         | 0         | 0                | 0      | 0.000                 | 0.000                  | 0.000                        |
| Arkansas | 2008 | 2,874,554  | F           | Legal | Legal |                 | 0         | 0         | 0                | 0      | 0.000                 | 0.000                  | 0.000                        |
| Arkansas | 2009 | 2,896,843  | F           | Legal | Legal |                 | 0         | 0         | 0                | 0      | 0.000                 | 0.000                  | 0.000                        |
| Arkansas | 2010 | 2,921,998  | F           | Legal | Legal |                 | 0         | 0         | 0                | 0      | 0.000                 | 0.000                  | 0.000                        |
| Arkansas | 2011 | 2,941,038  | F           | Legal | Legal |                 | 0         | 0         | 0                | 0      | 0.000                 | 0.000                  | 0.000                        |
| Arkansas | 2012 | 2,952,876  | F           | Legal | Legal |                 | 0         | 0         | 0                | 0      | 0.000                 | 0.000                  | 0.000                        |
| Arkansas | 2013 | 2,960,459  | F           | Legal | Legal |                 | 0         | 0         | 0                | 0      | 0.000                 | 0.000                  | 0.000                        |
| Arkansas | 2014 | 2,968,759  | F           | Legal | Legal |                 | 0         | 0         | 0                | 0      | 0.000                 | 0.000                  | 0.000                        |
| Arkansas | 2015 | 2,979,732  | F           | Legal | Legal |                 | 0         | 0         | 0                | 0      | 0.000                 | 0.000                  | 0.000                        |
| Arkansas | 2016 | 2,991,815  | F           | Legal | Legal |                 | 0         | 0         | 0                | 0      | 0.000                 | 0.000                  | 0.000                        |
| Arkansas | 2017 | 3,003,855  | F           | Legal | Legal |                 | 0         | 0         | 0                | 0      | 0.000                 | 0.000                  | 0.000                        |



| State      | Year | Population | Legal Class | Def 1 | Def 2 | Number Licenses | Outbreaks | Illnesses | Hospitalizations | Deaths | Outbreak Rate Per 1MM | Illnesses Rate Per 1MM | Hospitalization Rate Per 1MM |
|------------|------|------------|-------------|-------|-------|-----------------|-----------|-----------|------------------|--------|-----------------------|------------------------|------------------------------|
| Arkansas   | 2018 | 3,012,161  | F           | Legal | Legal |                 | 0         | 0         | 0                | 0      | 0.000                 | 0.000                  | 0.000                        |
| Arkansas   | 2019 | 3,020,985  | F           | Legal | Legal |                 | 0         | 0         | 0                | 0      | 0.000                 | 0.000                  | 0.000                        |
| Arkansas   | 2020 | 3,014,195  | F           | Legal | Legal |                 | 0         | 0         | 0                | 0      | 0.000                 | 0.000                  | 0.000                        |
| California | 2005 | 35,827,943 | R           | Legal | Legal | 2               | 0         | 0         | 0                | 0      | 0.000                 | 0.000                  | 0.000                        |
| California | 2006 | 36,021,202 | R           | Legal | Legal | 2               | 0         | 0         | 0                | 0      | 0.000                 | 0.000                  | 0.000                        |
| California | 2007 | 36,250,311 | R           | Legal | Legal | 2               | 1         | 11        | 0                | 0      | 0.028                 | 0.303                  | 0.000                        |
| California | 2008 | 36,604,337 | R           | Legal | Legal | 2               | 1         | 16        | 0                | 0      | 0.027                 | 0.437                  | 0.000                        |
| California | 2009 | 36,961,229 | R           | Legal | Legal | 2               | 0         | 0         | 0                | 0      | 0.000                 | 0.000                  | 0.000                        |
| California | 2010 | 37,319,550 | R           | Legal | Legal | 3               | 0         | 0         | 0                | 0      | 0.000                 | 0.000                  | 0.000                        |
| California | 2011 | 37,636,311 | R           | Legal | Legal | 3               | 1         | 5         | 3                | 0      | 0.027                 | 0.133                  | 0.080                        |
| California | 2012 | 37,944,551 | R           | Legal | Legal | 3               | 1         | 33        | 2                | 0      | 0.026                 | 0.870                  | 0.053                        |
| California | 2013 | 38,253,768 | R           | Legal | Legal | 5               | 0         | 0         | 0                | 0      | 0.000                 | 0.000                  | 0.000                        |
| California | 2014 | 38,586,706 | R           | Legal | Legal | 5               | 0         | 0         | 0                | 0      | 0.000                 | 0.000                  | 0.000                        |
| California | 2015 | 38,904,296 | R           | Legal | Legal | 5               | 1         | 8         | 2                | 0      | 0.026                 | 0.206                  | 0.051                        |
| California | 2016 | 39,149,186 | R           | Legal | Legal | 5               | 1         | 10        | 4                | 0      | 0.026                 | 0.255                  | 0.102                        |
| California | 2017 | 39,337,785 | R           | Legal | Legal | 5               | 0         | 0         | 0                | 0      | 0.000                 | 0.000                  | 0.000                        |
| California | 2018 | 39,437,463 | R           | Legal | Legal | 6               | 0         | 0         | 0                | 0      | 0.000                 | 0.000                  | 0.000                        |
| California | 2019 | 39,437,610 | R           | Legal | Legal | 6               | 0         | 0         | 0                | 0      | 0.000                 | 0.000                  | 0.000                        |
| California | 2020 | 39,501,653 | R           | Legal | Legal | 6               | 0         | 0         | 0                | 0      | 0.000                 | 0.000                  | 0.000                        |
| Colorado   | 2005 | 4,631,888  | H           | Legal | Legal | 7               | 2         | 27        | 0                | 0      | 0.432                 | 5.829                  | 0.000                        |
| Colorado   | 2006 | 4,720,423  | H           | Legal | Legal | 4               | 1         | 5         | 4                | 0      | 0.212                 | 1.059                  | 0.847                        |
| Colorado   | 2007 | 4,803,868  | H           | Legal | Legal | 7               | 0         | 0         | 0                | 0      | 0.000                 | 0.000                  | 0.000                        |
| Colorado   | 2008 | 4,889,730  | H           | Legal | Legal | 20              | 0         | 0         | 0                | 0      | 0.000                 | 0.000                  | 0.000                        |
| Colorado   | 2009 | 4,972,195  | H           | Legal | Legal | 16              | 1         | 81        | 1                | 0      | 0.201                 | 16.291                 | 0.201                        |
| Colorado   | 2010 | 5,047,539  | H           | Legal | Legal | 28              | 0         | 0         | 0                | 0      | 0.000                 | 0.000                  | 0.000                        |
| Colorado   | 2011 | 5,121,900  | H           | Legal | Legal | 22              | 0         | 0         | 0                | 0      | 0.000                 | 0.000                  | 0.000                        |
| Colorado   | 2012 | 5,193,660  | H           | Legal | Legal | 17              | 1         | 2         | 0                | 0      | 0.193                 | 0.385                  | 0.000                        |
| Colorado   | 2013 | 5,270,774  | H           | Legal | Legal | 19              | 1         | 32        | 1                | 0      | 0.190                 | 6.071                  | 0.190                        |
| Colorado   | 2014 | 5,352,637  | H           | Legal | Legal | 18              | 0         | 0         | 0                | 0      | 0.000                 | 0.000                  | 0.000                        |
| Colorado   | 2015 | 5,454,328  | H           | Legal | Legal | 12              | 0         | 0         | 0                | 0      | 0.000                 | 0.000                  | 0.000                        |
| Colorado   | 2016 | 5,543,844  | H           | Legal | Legal | 20              | 1         | 17        | 1                | 0      | 0.180                 | 3.066                  | 0.180                        |
| Colorado   | 2017 | 5,617,421  | H           | Legal | Legal | 11              | 0         | 0         | 0                | 0      | 0.000                 | 0.000                  | 0.000                        |
| Colorado   | 2018 | 5,697,155  | H           | Legal | Legal | 9               | 0         | 0         | 0                | 0      | 0.000                 | 0.000                  | 0.000                        |
| Colorado   | 2019 | 5,758,486  | H           | Legal | Legal | 11              | 0         | 0         | 0                | 0      | 0.000                 | 0.000                  | 0.000                        |

| State                | Year | Population | Legal Class | Def 1   | Def 2   | Number Licenses | Outbreaks | Illnesses | Hospitalizations | Deaths | Outbreak Rate Per 1MM | Illnesses Rate Per 1MM | Hospitalization Rate Per 1MM |
|----------------------|------|------------|-------------|---------|---------|-----------------|-----------|-----------|------------------|--------|-----------------------|------------------------|------------------------------|
| Colorado             | 2020 | 5,784,865  | H           | Legal   | Legal   | 4               | 0         | 0         | 0                | 0      | 0.000                 | 0.000                  | 0.000                        |
| Connecticut          | 2005 | 3,506,956  | R           | Legal   | Legal   |                 | 0         | 0         | 0                | 0      | 0.000                 | 0.000                  | 0.000                        |
| Connecticut          | 2006 | 3,517,460  | R           | Legal   | Legal   |                 | 0         | 0         | 0                | 0      | 0.000                 | 0.000                  | 0.000                        |
| Connecticut          | 2007 | 3,527,270  | R           | Legal   | Legal   |                 | 0         | 0         | 0                | 0      | 0.000                 | 0.000                  | 0.000                        |
| Connecticut          | 2008 | 3,545,579  | R           | Legal   | Legal   |                 | 1         | 14        | 5                | 0      | 0.282                 | 3.949                  | 1.410                        |
| Connecticut          | 2009 | 3,561,807  | R           | Legal   | Legal   |                 | 0         | 0         | 0                | 0      | 0.000                 | 0.000                  | 0.000                        |
| Connecticut          | 2010 | 3,579,173  | R           | Legal   | Legal   |                 | 0         | 0         | 0                | 0      | 0.000                 | 0.000                  | 0.000                        |
| Connecticut          | 2011 | 3,588,632  | R           | Legal   | Legal   |                 | 0         | 0         | 0                | 0      | 0.000                 | 0.000                  | 0.000                        |
| Connecticut          | 2012 | 3,595,211  | R           | Legal   | Legal   |                 | 0         | 0         | 0                | 0      | 0.000                 | 0.000                  | 0.000                        |
| Connecticut          | 2013 | 3,595,792  | R           | Legal   | Legal   |                 | 1         | 7         | 1                | 0      | 0.278                 | 1.947                  | 0.278                        |
| Connecticut          | 2014 | 3,595,697  | R           | Legal   | Legal   |                 | 0         | 0         | 0                | 0      | 0.000                 | 0.000                  | 0.000                        |
| Connecticut          | 2015 | 3,588,561  | R           | Legal   | Legal   |                 | 0         | 0         | 0                | 0      | 0.000                 | 0.000                  | 0.000                        |
| Connecticut          | 2016 | 3,579,830  | R           | Legal   | Legal   |                 | 0         | 0         | 0                | 0      | 0.000                 | 0.000                  | 0.000                        |
| Connecticut          | 2017 | 3,575,324  | R           | Legal   | Legal   |                 | 0         | 0         | 0                | 0      | 0.000                 | 0.000                  | 0.000                        |
| Connecticut          | 2018 | 3,574,561  | R           | Legal   | Legal   |                 | 0         | 0         | 0                | 0      | 0.000                 | 0.000                  | 0.000                        |
| Connecticut          | 2019 | 3,566,022  | R           | Legal   | Legal   |                 | 0         | 0         | 0                | 0      | 0.000                 | 0.000                  | 0.000                        |
| Connecticut          | 2020 | 3,597,362  | R           | Legal   | Legal   |                 | 0         | 0         | 0                | 0      | 0.000                 | 0.000                  | 0.000                        |
| Delaware             | 2005 | 845,150    | I           | Illegal | Illegal |                 | 0         | 0         | 0                | 0      | 0.000                 | 0.000                  | 0.000                        |
| Delaware             | 2006 | 859,268    | I           | Illegal | Illegal |                 | 0         | 0         | 0                | 0      | 0.000                 | 0.000                  | 0.000                        |
| Delaware             | 2007 | 871,749    | I           | Illegal | Illegal |                 | 0         | 0         | 0                | 0      | 0.000                 | 0.000                  | 0.000                        |
| Delaware             | 2008 | 883,874    | I           | Illegal | Illegal |                 | 0         | 0         | 0                | 0      | 0.000                 | 0.000                  | 0.000                        |
| Delaware             | 2009 | 891,730    | I           | Illegal | Illegal |                 | 0         | 0         | 0                | 0      | 0.000                 | 0.000                  | 0.000                        |
| Delaware             | 2010 | 899,647    | I           | Illegal | Illegal |                 | 0         | 0         | 0                | 0      | 0.000                 | 0.000                  | 0.000                        |
| Delaware             | 2011 | 907,590    | I           | Illegal | Illegal |                 | 0         | 0         | 0                | 0      | 0.000                 | 0.000                  | 0.000                        |
| Delaware             | 2012 | 915,518    | I           | Illegal | Illegal |                 | 0         | 0         | 0                | 0      | 0.000                 | 0.000                  | 0.000                        |
| Delaware             | 2013 | 924,062    | I           | Illegal | Illegal |                 | 0         | 0         | 0                | 0      | 0.000                 | 0.000                  | 0.000                        |
| Delaware             | 2014 | 933,131    | I           | Illegal | Illegal |                 | 0         | 0         | 0                | 0      | 0.000                 | 0.000                  | 0.000                        |
| Delaware             | 2015 | 942,065    | I           | Illegal | Illegal |                 | 0         | 0         | 0                | 0      | 0.000                 | 0.000                  | 0.000                        |
| Delaware             | 2016 | 949,989    | I           | Illegal | Illegal |                 | 0         | 0         | 0                | 0      | 0.000                 | 0.000                  | 0.000                        |
| Delaware             | 2017 | 957,942    | I           | Illegal | Illegal |                 | 0         | 0         | 0                | 0      | 0.000                 | 0.000                  | 0.000                        |
| Delaware             | 2018 | 966,985    | I           | Illegal | Illegal |                 | 0         | 0         | 0                | 0      | 0.000                 | 0.000                  | 0.000                        |
| Delaware             | 2019 | 976,668    | I           | Illegal | Illegal |                 | 0         | 0         | 0                | 0      | 0.000                 | 0.000                  | 0.000                        |
| Delaware             | 2020 | 992,114    | I           | Illegal | Illegal |                 | 0         | 0         | 0                | 0      | 0.000                 | 0.000                  | 0.000                        |
| District of Columbia | 2005 | 567,136    | I           | Illegal | Illegal |                 | 0         | 0         | 0                | 0      | 0.000                 | 0.000                  | 0.000                        |

| State                | Year | Population | Legal Class | Def 1   | Def 2   | Number Licenses | Outbreaks | Illnesses | Hospitalizations | Deaths | Outbreak Rate Per 1MM | Illnesses Rate Per 1MM | Hospitalization Rate Per 1MM |
|----------------------|------|------------|-------------|---------|---------|-----------------|-----------|-----------|------------------|--------|-----------------------|------------------------|------------------------------|
| District of Columbia | 2006 | 570,681    | I           | Illegal | Illegal |                 | 0         | 0         | 0                | 0      | 0.000                 | 0.000                  | 0.000                        |
| District of Columbia | 2007 | 574,404    | I           | Illegal | Illegal |                 | 0         | 0         | 0                | 0      | 0.000                 | 0.000                  | 0.000                        |
| District of Columbia | 2008 | 580,236    | I           | Illegal | Illegal |                 | 0         | 0         | 0                | 0      | 0.000                 | 0.000                  | 0.000                        |
| District of Columbia | 2009 | 592,228    | I           | Illegal | Illegal |                 | 0         | 0         | 0                | 0      | 0.000                 | 0.000                  | 0.000                        |
| District of Columbia | 2010 | 605,282    | I           | Illegal | Illegal |                 | 0         | 0         | 0                | 0      | 0.000                 | 0.000                  | 0.000                        |
| District of Columbia | 2011 | 620,290    | I           | Illegal | Illegal |                 | 0         | 0         | 0                | 0      | 0.000                 | 0.000                  | 0.000                        |
| District of Columbia | 2012 | 635,737    | I           | Illegal | Illegal |                 | 0         | 0         | 0                | 0      | 0.000                 | 0.000                  | 0.000                        |
| District of Columbia | 2013 | 651,559    | I           | Illegal | Illegal |                 | 0         | 0         | 0                | 0      | 0.000                 | 0.000                  | 0.000                        |
| District of Columbia | 2014 | 663,603    | I           | Illegal | Illegal |                 | 0         | 0         | 0                | 0      | 0.000                 | 0.000                  | 0.000                        |
| District of Columbia | 2015 | 677,014    | I           | Illegal | Illegal |                 | 0         | 0         | 0                | 0      | 0.000                 | 0.000                  | 0.000                        |
| District of Columbia | 2016 | 687,576    | I           | Illegal | Illegal |                 | 0         | 0         | 0                | 0      | 0.000                 | 0.000                  | 0.000                        |
| District of Columbia | 2017 | 697,079    | I           | Illegal | Illegal |                 | 0         | 0         | 0                | 0      | 0.000                 | 0.000                  | 0.000                        |
| District of Columbia | 2018 | 704,147    | I           | Illegal | Illegal |                 | 0         | 0         | 0                | 0      | 0.000                 | 0.000                  | 0.000                        |
| District of Columbia | 2019 | 708,253    | I           | Illegal | Illegal |                 | 0         | 0         | 0                | 0      | 0.000                 | 0.000                  | 0.000                        |
| District of Columbia | 2020 | 670,868    | I           | Illegal | Illegal |                 | 0         | 0         | 0                | 0      | 0.000                 | 0.000                  | 0.000                        |
| Florida              | 2005 | 17,842,038 | P           | Legal   | Illegal |                 | 0         | 0         | 0                | 0      | 0.000                 | 0.000                  | 0.000                        |
| Florida              | 2006 | 18,166,990 | P           | Legal   | Illegal |                 | 0         | 0         | 0                | 0      | 0.000                 | 0.000                  | 0.000                        |
| Florida              | 2007 | 18,367,842 | P           | Legal   | Illegal |                 | 0         | 0         | 0                | 0      | 0.000                 | 0.000                  | 0.000                        |
| Florida              | 2008 | 18,527,305 | P           | Legal   | Illegal |                 | 0         | 0         | 0                | 0      | 0.000                 | 0.000                  | 0.000                        |
| Florida              | 2009 | 18,652,644 | P           | Legal   | Illegal |                 | 0         | 0         | 0                | 0      | 0.000                 | 0.000                  | 0.000                        |
| Florida              | 2010 | 18,846,143 | P           | Legal   | Illegal |                 | 0         | 0         | 0                | 0      | 0.000                 | 0.000                  | 0.000                        |
| Florida              | 2011 | 19,055,607 | P           | Legal   | Illegal |                 | 0         | 0         | 0                | 0      | 0.000                 | 0.000                  | 0.000                        |
| Florida              | 2012 | 19,302,016 | P           | Legal   | Illegal |                 | 0         | 0         | 0                | 0      | 0.000                 | 0.000                  | 0.000                        |
| Florida              | 2013 | 19,551,678 | P           | Legal   | Illegal |                 | 0         | 0         | 0                | 0      | 0.000                 | 0.000                  | 0.000                        |
| Florida              | 2014 | 19,853,880 | P           | Legal   | Illegal |                 | 0         | 0         | 0                | 0      | 0.000                 | 0.000                  | 0.000                        |
| Florida              | 2015 | 20,219,111 | P           | Legal   | Illegal |                 | 0         | 0         | 0                | 0      | 0.000                 | 0.000                  | 0.000                        |
| Florida              | 2016 | 20,627,237 | P           | Legal   | Illegal |                 | 1         | 3         | 0                | 0      | 0.048                 | 0.145                  | 0.000                        |
| Florida              | 2017 | 20,977,089 | P           | Legal   | Illegal |                 | 0         | 0         | 0                | 0      | 0.000                 | 0.000                  | 0.000                        |
| Florida              | 2018 | 21,254,926 | P           | Legal   | Illegal |                 | 0         | 0         | 0                | 0      | 0.000                 | 0.000                  | 0.000                        |
| Florida              | 2019 | 21,492,056 | P           | Legal   | Illegal |                 | 0         | 0         | 0                | 0      | 0.000                 | 0.000                  | 0.000                        |
| Florida              | 2020 | 21,589,602 | P           | Legal   | Illegal |                 | 0         | 0         | 0                | 0      | 0.000                 | 0.000                  | 0.000                        |
| Georgia              | 2005 | 8,925,922  | P           | Legal   | Illegal |                 | 0         | 0         | 0                | 0      | 0.000                 | 0.000                  | 0.000                        |
| Georgia              | 2006 | 9,155,813  | P           | Legal   | Illegal |                 | 0         | 0         | 0                | 0      | 0.000                 | 0.000                  | 0.000                        |
| Georgia              | 2007 | 9,349,988  | P           | Legal   | Illegal |                 | 1         | 8         | 0                | 0      | 0.107                 | 0.856                  | 0.000                        |

| State   | Year | Population | Legal Class | Def 1   | Def 2   | Number Licenses | Outbreaks | Illnesses | Hospitalizations | Deaths | Outbreak Rate Per 1MM | Illnesses Rate Per 1MM | Hospitalization Rate Per 1MM |
|---------|------|------------|-------------|---------|---------|-----------------|-----------|-----------|------------------|--------|-----------------------|------------------------|------------------------------|
| Georgia | 2008 | 9,504,843  | P           | Legal   | Illegal |                 | 0         | 0         | 0                | 0      | 0.000                 | 0.000                  | 0.000                        |
| Georgia | 2009 | 9,620,846  | P           | Legal   | Illegal |                 | 0         | 0         | 0                | 0      | 0.000                 | 0.000                  | 0.000                        |
| Georgia | 2010 | 9,712,209  | P           | Legal   | Illegal |                 | 0         | 0         | 0                | 0      | 0.000                 | 0.000                  | 0.000                        |
| Georgia | 2011 | 9,803,630  | P           | Legal   | Illegal |                 | 0         | 0         | 0                | 0      | 0.000                 | 0.000                  | 0.000                        |
| Georgia | 2012 | 9,903,580  | P           | Legal   | Illegal |                 | 0         | 0         | 0                | 0      | 0.000                 | 0.000                  | 0.000                        |
| Georgia | 2013 | 9,975,592  | P           | Legal   | Illegal |                 | 0         | 0         | 0                | 0      | 0.000                 | 0.000                  | 0.000                        |
| Georgia | 2014 | 10,071,204 | P           | Legal   | Illegal |                 | 0         | 0         | 0                | 0      | 0.000                 | 0.000                  | 0.000                        |
| Georgia | 2015 | 10,183,353 | P           | Legal   | Illegal |                 | 0         | 0         | 0                | 0      | 0.000                 | 0.000                  | 0.000                        |
| Georgia | 2016 | 10,308,442 | P           | Legal   | Illegal |                 | 0         | 0         | 0                | 0      | 0.000                 | 0.000                  | 0.000                        |
| Georgia | 2017 | 10,417,031 | P           | Legal   | Illegal |                 | 0         | 0         | 0                | 0      | 0.000                 | 0.000                  | 0.000                        |
| Georgia | 2018 | 10,519,389 | P           | Legal   | Illegal |                 | 0         | 0         | 0                | 0      | 0.000                 | 0.000                  | 0.000                        |
| Georgia | 2019 | 10,628,020 | P           | Legal   | Illegal |                 | 0         | 0         | 0                | 0      | 0.000                 | 0.000                  | 0.000                        |
| Georgia | 2020 | 10,729,828 | P           | Legal   | Illegal |                 | 0         | 0         | 0                | 0      | 0.000                 | 0.000                  | 0.000                        |
| Hawaii  | 2005 | 1,292,729  | I           | Illegal | Illegal |                 | 0         | 0         | 0                | 0      | 0.000                 | 0.000                  | 0.000                        |
| Hawaii  | 2006 | 1,309,731  | I           | Illegal | Illegal |                 | 0         | 0         | 0                | 0      | 0.000                 | 0.000                  | 0.000                        |
| Hawaii  | 2007 | 1,315,675  | I           | Illegal | Illegal |                 | 0         | 0         | 0                | 0      | 0.000                 | 0.000                  | 0.000                        |
| Hawaii  | 2008 | 1,332,213  | I           | Illegal | Illegal |                 | 0         | 0         | 0                | 0      | 0.000                 | 0.000                  | 0.000                        |
| Hawaii  | 2009 | 1,346,717  | I           | Illegal | Illegal |                 | 0         | 0         | 0                | 0      | 0.000                 | 0.000                  | 0.000                        |
| Hawaii  | 2010 | 1,364,004  | I           | Illegal | Illegal |                 | 0         | 0         | 0                | 0      | 0.000                 | 0.000                  | 0.000                        |
| Hawaii  | 2011 | 1,379,562  | I           | Illegal | Illegal |                 | 0         | 0         | 0                | 0      | 0.000                 | 0.000                  | 0.000                        |
| Hawaii  | 2012 | 1,395,199  | I           | Illegal | Illegal |                 | 0         | 0         | 0                | 0      | 0.000                 | 0.000                  | 0.000                        |
| Hawaii  | 2013 | 1,408,822  | I           | Illegal | Illegal |                 | 0         | 0         | 0                | 0      | 0.000                 | 0.000                  | 0.000                        |
| Hawaii  | 2014 | 1,415,335  | I           | Illegal | Illegal |                 | 0         | 0         | 0                | 0      | 0.000                 | 0.000                  | 0.000                        |
| Hawaii  | 2015 | 1,422,999  | I           | Illegal | Illegal |                 | 0         | 0         | 0                | 0      | 0.000                 | 0.000                  | 0.000                        |
| Hawaii  | 2016 | 1,428,885  | I           | Illegal | Illegal |                 | 0         | 0         | 0                | 0      | 0.000                 | 0.000                  | 0.000                        |
| Hawaii  | 2017 | 1,425,763  | I           | Illegal | Illegal |                 | 0         | 0         | 0                | 0      | 0.000                 | 0.000                  | 0.000                        |
| Hawaii  | 2018 | 1,423,102  | I           | Illegal | Illegal |                 | 0         | 0         | 0                | 0      | 0.000                 | 0.000                  | 0.000                        |
| Hawaii  | 2019 | 1,415,615  | I           | Illegal | Illegal |                 | 0         | 0         | 0                | 0      | 0.000                 | 0.000                  | 0.000                        |
| Hawaii  | 2020 | 1,451,043  | I           | Illegal | Illegal |                 | 0         | 0         | 0                | 0      | 0.000                 | 0.000                  | 0.000                        |
| Idaho   | 2005 | 1,428,241  | R           | Legal   | Legal   |                 | 0         | 0         | 0                | 0      | 0.000                 | 0.000                  | 0.000                        |
| Idaho   | 2006 | 1,468,669  | R           | Legal   | Legal   |                 | 1         | 4         | 0                | 0      | 0.681                 | 2.724                  | 0.000                        |
| Idaho   | 2007 | 1,505,105  | R           | Legal   | Legal   |                 | 0         | 0         | 0                | 0      | 0.000                 | 0.000                  | 0.000                        |
| Idaho   | 2008 | 1,534,320  | R           | Legal   | Legal   |                 | 1         | 5         | 0                | 0      | 0.652                 | 3.259                  | 0.000                        |
| Idaho   | 2009 | 1,554,439  | R           | Legal   | Legal   |                 | 0         | 0         | 0                | 0      | 0.000                 | 0.000                  | 0.000                        |

| State    | Year | Population | Legal Class | Def 1 | Def 2 | Number Licenses | Outbreaks | Illnesses | Hospitalizations | Deaths | Outbreak Rate Per 1MM | Illnesses Rate Per 1MM | Hospitalization Rate Per 1MM |
|----------|------|------------|-------------|-------|-------|-----------------|-----------|-----------|------------------|--------|-----------------------|------------------------|------------------------------|
| Idaho    | 2010 | 1,570,819  | R           | Legal | Legal |                 | 0         | 0         | 0                | 0      | 0.000                 | 0.000                  | 0.000                        |
| Idaho    | 2011 | 1,584,272  | R           | Legal | Legal |                 | 0         | 0         | 0                | 0      | 0.000                 | 0.000                  | 0.000                        |
| Idaho    | 2012 | 1,595,910  | R           | Legal | Legal |                 | 0         | 0         | 0                | 0      | 0.000                 | 0.000                  | 0.000                        |
| Idaho    | 2013 | 1,612,053  | R           | Legal | Legal |                 | 0         | 0         | 0                | 0      | 0.000                 | 0.000                  | 0.000                        |
| Idaho    | 2014 | 1,632,248  | R           | Legal | Legal |                 | 1         | 4         | 1                | 0      | 0.613                 | 2.451                  | 0.613                        |
| Idaho    | 2015 | 1,652,495  | R           | Legal | Legal |                 | 1         | 15        | 3                | 0      | 0.605                 | 9.077                  | 1.815                        |
| Idaho    | 2016 | 1,684,036  | R           | Legal | Legal |                 | 0         | 0         | 0                | 0      | 0.000                 | 0.000                  | 0.000                        |
| Idaho    | 2017 | 1,719,745  | R           | Legal | Legal |                 | 1         | 2         | 0                | 0      | 0.581                 | 1.163                  | 0.000                        |
| Idaho    | 2018 | 1,752,074  | R           | Legal | Legal |                 | 1         | 2         | 0                | 0      | 0.571                 | 1.142                  | 0.000                        |
| Idaho    | 2019 | 1,789,060  | R           | Legal | Legal |                 | 0         | 0         | 0                | 0      | 0.000                 | 0.000                  | 0.000                        |
| Idaho    | 2020 | 1,849,202  | R           | Legal | Legal |                 | 0         | 0         | 0                | 0      | 0.000                 | 0.000                  | 0.000                        |
| Illinois | 2005 | 12,609,903 | H           | Legal | Legal |                 | 0         | 0         | 0                | 0      | 0.000                 | 0.000                  | 0.000                        |
| Illinois | 2006 | 12,643,955 | H           | Legal | Legal |                 | 1         | 18        | 0                | 0      | 0.079                 | 1.424                  | 0.000                        |
| Illinois | 2007 | 12,695,866 | H           | Legal | Legal |                 | 0         | 0         | 0                | 0      | 0.000                 | 0.000                  | 0.000                        |
| Illinois | 2008 | 12,747,038 | H           | Legal | Legal |                 | 0         | 0         | 0                | 0      | 0.000                 | 0.000                  | 0.000                        |
| Illinois | 2009 | 12,796,778 | H           | Legal | Legal |                 | 0         | 0         | 0                | 0      | 0.000                 | 0.000                  | 0.000                        |
| Illinois | 2010 | 12,840,545 | H           | Legal | Legal |                 | 1         | 2         | 0                | 0      | 0.078                 | 0.156                  | 0.000                        |
| Illinois | 2011 | 12,867,783 | H           | Legal | Legal |                 | 0         | 0         | 0                | 0      | 0.000                 | 0.000                  | 0.000                        |
| Illinois | 2012 | 12,883,029 | H           | Legal | Legal |                 | 0         | 0         | 0                | 0      | 0.000                 | 0.000                  | 0.000                        |
| Illinois | 2013 | 12,895,778 | H           | Legal | Legal |                 | 0         | 0         | 0                | 0      | 0.000                 | 0.000                  | 0.000                        |
| Illinois | 2014 | 12,885,092 | H           | Legal | Legal |                 | 0         | 0         | 0                | 0      | 0.000                 | 0.000                  | 0.000                        |
| Illinois | 2015 | 12,859,585 | H           | Legal | Legal |                 | 0         | 0         | 0                | 0      | 0.000                 | 0.000                  | 0.000                        |
| Illinois | 2016 | 12,821,709 | F           | Legal | Legal |                 | 1         | 7         | 1                | 0      | 0.078                 | 0.546                  | 0.078                        |
| Illinois | 2017 | 12,779,893 | F           | Legal | Legal |                 | 1         | 11        | 1                | 0      | 0.078                 | 0.861                  | 0.078                        |
| Illinois | 2018 | 12,724,685 | F           | Legal | Legal |                 | 0         | 0         | 0                | 0      | 0.000                 | 0.000                  | 0.000                        |
| Illinois | 2019 | 12,667,017 | F           | Legal | Legal |                 | 0         | 0         | 0                | 0      | 0.000                 | 0.000                  | 0.000                        |
| Illinois | 2020 | 12,786,580 | F           | Legal | Legal |                 | 0         | 0         | 0                | 0      | 0.000                 | 0.000                  | 0.000                        |
| Indiana  | 2005 | 6,278,616  | H           | Legal | Legal |                 | 0         | 0         | 0                | 0      | 0.000                 | 0.000                  | 0.000                        |
| Indiana  | 2006 | 6,332,669  | H           | Legal | Legal |                 | 0         | 0         | 0                | 0      | 0.000                 | 0.000                  | 0.000                        |
| Indiana  | 2007 | 6,379,599  | H           | Legal | Legal |                 | 0         | 0         | 0                | 0      | 0.000                 | 0.000                  | 0.000                        |
| Indiana  | 2008 | 6,424,806  | H           | Legal | Legal |                 | 0         | 0         | 0                | 0      | 0.000                 | 0.000                  | 0.000                        |
| Indiana  | 2009 | 6,459,325  | H           | Legal | Legal |                 | 0         | 0         | 0                | 0      | 0.000                 | 0.000                  | 0.000                        |
| Indiana  | 2010 | 6,490,555  | H           | Legal | Legal |                 | 1         | 25        | 0                | 0      | 0.154                 | 3.852                  | 0.000                        |
| Indiana  | 2011 | 6,517,250  | H           | Legal | Legal |                 | 0         | 0         | 0                | 0      | 0.000                 | 0.000                  | 0.000                        |

| State   | Year | Population | Legal Class | Def 1   | Def 2   | Number Licenses | Outbreaks | Illnesses | Hospitalizations | Deaths | Outbreak Rate Per 1MM | Illnesses Rate Per 1MM | Hospitalization Rate Per 1MM |
|---------|------|------------|-------------|---------|---------|-----------------|-----------|-----------|------------------|--------|-----------------------|------------------------|------------------------------|
| Indiana | 2012 | 6,538,989  | H           | Legal   | Legal   |                 | 0         | 0         | 0                | 0      | 0.000                 | 0.000                  | 0.000                        |
| Indiana | 2013 | 6,570,575  | H           | Legal   | Legal   |                 | 0         | 0         | 0                | 0      | 0.000                 | 0.000                  | 0.000                        |
| Indiana | 2014 | 6,596,019  | H           | Legal   | Legal   |                 | 0         | 0         | 0                | 0      | 0.000                 | 0.000                  | 0.000                        |
| Indiana | 2015 | 6,611,442  | H           | Legal   | Legal   |                 | 0         | 0         | 0                | 0      | 0.000                 | 0.000                  | 0.000                        |
| Indiana | 2016 | 6,637,898  | H           | Legal   | Legal   |                 | 0         | 0         | 0                | 0      | 0.000                 | 0.000                  | 0.000                        |
| Indiana | 2017 | 6,662,068  | H           | Legal   | Legal   |                 | 0         | 0         | 0                | 0      | 0.000                 | 0.000                  | 0.000                        |
| Indiana | 2018 | 6,698,481  | H           | Legal   | Legal   |                 | 0         | 0         | 0                | 0      | 0.000                 | 0.000                  | 0.000                        |
| Indiana | 2019 | 6,731,010  | H           | Legal   | Legal   |                 | 0         | 0         | 0                | 0      | 0.000                 | 0.000                  | 0.000                        |
| Indiana | 2020 | 6,788,799  | H           | Legal   | Legal   |                 | 0         | 0         | 0                | 0      | 0.000                 | 0.000                  | 0.000                        |
| Iowa    | 2005 | 2,964,454  | I           | Illegal | Illegal |                 | 1         | 33        | 0                | 0      | 0.337                 | 11.132                 | 0.000                        |
| Iowa    | 2006 | 2,982,644  | I           | Illegal | Illegal |                 | 0         | 0         | 0                | 0      | 0.000                 | 0.000                  | 0.000                        |
| Iowa    | 2007 | 2,999,212  | I           | Illegal | Illegal |                 | 0         | 0         | 0                | 0      | 0.000                 | 0.000                  | 0.000                        |
| Iowa    | 2008 | 3,016,734  | I           | Illegal | Illegal |                 | 0         | 0         | 0                | 0      | 0.000                 | 0.000                  | 0.000                        |
| Iowa    | 2009 | 3,032,870  | I           | Illegal | Illegal |                 | 0         | 0         | 0                | 0      | 0.000                 | 0.000                  | 0.000                        |
| Iowa    | 2010 | 3,050,819  | I           | Illegal | Illegal |                 | 0         | 0         | 0                | 0      | 0.000                 | 0.000                  | 0.000                        |
| Iowa    | 2011 | 3,066,772  | I           | Illegal | Illegal |                 | 0         | 0         | 0                | 0      | 0.000                 | 0.000                  | 0.000                        |
| Iowa    | 2012 | 3,076,844  | I           | Illegal | Illegal |                 | 1         | 5         | 0                | 0      | 0.325                 | 1.625                  | 0.000                        |
| Iowa    | 2013 | 3,093,935  | I           | Illegal | Illegal |                 | 0         | 0         | 0                | 0      | 0.000                 | 0.000                  | 0.000                        |
| Iowa    | 2014 | 3,110,643  | I           | Illegal | Illegal |                 | 0         | 0         | 0                | 0      | 0.000                 | 0.000                  | 0.000                        |
| Iowa    | 2015 | 3,122,541  | I           | Illegal | Illegal |                 | 0         | 0         | 0                | 0      | 0.000                 | 0.000                  | 0.000                        |
| Iowa    | 2016 | 3,133,210  | I           | Illegal | Illegal |                 | 0         | 0         | 0                | 0      | 0.000                 | 0.000                  | 0.000                        |
| Iowa    | 2017 | 3,143,734  | I           | Illegal | Illegal |                 | 0         | 0         | 0                | 0      | 0.000                 | 0.000                  | 0.000                        |
| Iowa    | 2018 | 3,149,900  | I           | Illegal | Illegal |                 | 0         | 0         | 0                | 0      | 0.000                 | 0.000                  | 0.000                        |
| Iowa    | 2019 | 3,159,596  | I           | Illegal | Illegal |                 | 0         | 0         | 0                | 0      | 0.000                 | 0.000                  | 0.000                        |
| Iowa    | 2020 | 3,190,571  | I           | Illegal | Illegal |                 | 1         | 9         | 0                | 0      | 0.313                 | 2.821                  | 0.000                        |
| Kansas  | 2005 | 2,745,299  | F           | Legal   | Legal   |                 | 1         | 4         | 0                | 0      | 0.364                 | 1.457                  | 0.000                        |
| Kansas  | 2006 | 2,762,931  | F           | Legal   | Legal   |                 | 0         | 0         | 0                | 0      | 0.000                 | 0.000                  | 0.000                        |
| Kansas  | 2007 | 2,783,785  | F           | Legal   | Legal   |                 | 0         | 0         | 0                | 0      | 0.000                 | 0.000                  | 0.000                        |
| Kansas  | 2008 | 2,808,076  | F           | Legal   | Legal   |                 | 0         | 0         | 0                | 0      | 0.000                 | 0.000                  | 0.000                        |
| Kansas  | 2009 | 2,832,704  | F           | Legal   | Legal   |                 | 0         | 0         | 0                | 0      | 0.000                 | 0.000                  | 0.000                        |
| Kansas  | 2010 | 2,858,266  | F           | Legal   | Legal   |                 | 0         | 0         | 0                | 0      | 0.000                 | 0.000                  | 0.000                        |
| Kansas  | 2011 | 2,869,677  | F           | Legal   | Legal   |                 | 0         | 0         | 0                | 0      | 0.000                 | 0.000                  | 0.000                        |
| Kansas  | 2012 | 2,886,024  | F           | Legal   | Legal   |                 | 0         | 0         | 0                | 0      | 0.000                 | 0.000                  | 0.000                        |
| Kansas  | 2013 | 2,894,306  | F           | Legal   | Legal   |                 | 0         | 0         | 0                | 0      | 0.000                 | 0.000                  | 0.000                        |

| State     | Year | Population | Legal Class | Def 1   | Def 2   | Number Licenses | Outbreaks | Illnesses | Hospitalizations | Deaths | Outbreak Rate Per 1MM | Illnesses Rate Per 1MM | Hospitalization Rate Per 1MM |
|-----------|------|------------|-------------|---------|---------|-----------------|-----------|-----------|------------------|--------|-----------------------|------------------------|------------------------------|
| Kansas    | 2014 | 2,901,861  | F           | Legal   | Legal   |                 | 0         | 0         | 0                | 0      | 0.000                 | 0.000                  | 0.000                        |
| Kansas    | 2015 | 2,910,717  | F           | Legal   | Legal   |                 | 0         | 0         | 0                | 0      | 0.000                 | 0.000                  | 0.000                        |
| Kansas    | 2016 | 2,912,977  | F           | Legal   | Legal   |                 | 0         | 0         | 0                | 0      | 0.000                 | 0.000                  | 0.000                        |
| Kansas    | 2017 | 2,910,892  | F           | Legal   | Legal   |                 | 0         | 0         | 0                | 0      | 0.000                 | 0.000                  | 0.000                        |
| Kansas    | 2018 | 2,912,748  | F           | Legal   | Legal   |                 | 0         | 0         | 0                | 0      | 0.000                 | 0.000                  | 0.000                        |
| Kansas    | 2019 | 2,912,635  | F           | Legal   | Legal   |                 | 0         | 0         | 0                | 0      | 0.000                 | 0.000                  | 0.000                        |
| Kansas    | 2020 | 2,937,919  | F           | Legal   | Legal   |                 | 0         | 0         | 0                | 0      | 0.000                 | 0.000                  | 0.000                        |
| Kentucky  | 2005 | 4,182,742  | I           | Illegal | Illegal |                 | 0         | 0         | 0                | 0      | 0.000                 | 0.000                  | 0.000                        |
| Kentucky  | 2006 | 4,219,239  | I           | Illegal | Illegal |                 | 0         | 0         | 0                | 0      | 0.000                 | 0.000                  | 0.000                        |
| Kentucky  | 2007 | 4,256,672  | I           | Illegal | Illegal |                 | 0         | 0         | 0                | 0      | 0.000                 | 0.000                  | 0.000                        |
| Kentucky  | 2008 | 4,289,878  | I           | Illegal | Illegal |                 | 0         | 0         | 0                | 0      | 0.000                 | 0.000                  | 0.000                        |
| Kentucky  | 2009 | 4,317,074  | I           | Illegal | Illegal |                 | 0         | 0         | 0                | 0      | 0.000                 | 0.000                  | 0.000                        |
| Kentucky  | 2010 | 4,348,464  | I           | Illegal | Illegal |                 | 0         | 0         | 0                | 0      | 0.000                 | 0.000                  | 0.000                        |
| Kentucky  | 2011 | 4,370,817  | H           | Legal   | Legal   |                 | 0         | 0         | 0                | 0      | 0.000                 | 0.000                  | 0.000                        |
| Kentucky  | 2012 | 4,387,865  | H           | Legal   | Legal   |                 | 0         | 0         | 0                | 0      | 0.000                 | 0.000                  | 0.000                        |
| Kentucky  | 2013 | 4,406,906  | H           | Legal   | Legal   |                 | 0         | 0         | 0                | 0      | 0.000                 | 0.000                  | 0.000                        |
| Kentucky  | 2014 | 4,416,992  | H           | Legal   | Legal   |                 | 1         | 4         | 4                | 0      | 0.226                 | 0.906                  | 0.906                        |
| Kentucky  | 2015 | 4,429,126  | H           | Legal   | Legal   |                 | 0         | 0         | 0                | 0      | 0.000                 | 0.000                  | 0.000                        |
| Kentucky  | 2016 | 4,440,306  | H           | Legal   | Legal   |                 | 0         | 0         | 0                | 0      | 0.000                 | 0.000                  | 0.000                        |
| Kentucky  | 2017 | 4,455,590  | H           | Legal   | Legal   |                 | 0         | 0         | 0                | 0      | 0.000                 | 0.000                  | 0.000                        |
| Kentucky  | 2018 | 4,464,273  | H           | Legal   | Legal   |                 | 0         | 0         | 0                | 0      | 0.000                 | 0.000                  | 0.000                        |
| Kentucky  | 2019 | 4,472,345  | H           | Legal   | Legal   |                 | 0         | 0         | 0                | 0      | 0.000                 | 0.000                  | 0.000                        |
| Kentucky  | 2020 | 4,507,445  | H           | Legal   | Legal   |                 | 0         | 0         | 0                | 0      | 0.000                 | 0.000                  | 0.000                        |
| Louisiana | 2005 | 4,576,628  | I           | Illegal | Illegal |                 | 0         | 0         | 0                | 0      | 0.000                 | 0.000                  | 0.000                        |
| Louisiana | 2006 | 4,302,665  | I           | Illegal | Illegal |                 | 0         | 0         | 0                | 0      | 0.000                 | 0.000                  | 0.000                        |
| Louisiana | 2007 | 4,375,581  | I           | Illegal | Illegal |                 | 0         | 0         | 0                | 0      | 0.000                 | 0.000                  | 0.000                        |
| Louisiana | 2008 | 4,435,586  | I           | Illegal | Illegal |                 | 0         | 0         | 0                | 0      | 0.000                 | 0.000                  | 0.000                        |
| Louisiana | 2009 | 4,491,648  | I           | Illegal | Illegal |                 | 0         | 0         | 0                | 0      | 0.000                 | 0.000                  | 0.000                        |
| Louisiana | 2010 | 4,544,635  | I           | Illegal | Illegal |                 | 0         | 0         | 0                | 0      | 0.000                 | 0.000                  | 0.000                        |
| Louisiana | 2011 | 4,576,244  | I           | Illegal | Illegal |                 | 0         | 0         | 0                | 0      | 0.000                 | 0.000                  | 0.000                        |
| Louisiana | 2012 | 4,602,067  | I           | Illegal | Illegal |                 | 0         | 0         | 0                | 0      | 0.000                 | 0.000                  | 0.000                        |
| Louisiana | 2013 | 4,626,040  | I           | Illegal | Illegal |                 | 0         | 0         | 0                | 0      | 0.000                 | 0.000                  | 0.000                        |
| Louisiana | 2014 | 4,645,938  | I           | Illegal | Illegal |                 | 0         | 0         | 0                | 0      | 0.000                 | 0.000                  | 0.000                        |
| Louisiana | 2015 | 4,666,998  | I           | Illegal | Illegal |                 | 0         | 0         | 0                | 0      | 0.000                 | 0.000                  | 0.000                        |

| State     | Year | Population | Legal Class | Def 1   | Def 2   | Number Licenses | Outbreaks | Illnesses | Hospitalizations | Deaths | Outbreak Rate Per 1MM | Illnesses Rate Per 1MM | Hospitalization Rate Per 1MM |
|-----------|------|------------|-------------|---------|---------|-----------------|-----------|-----------|------------------|--------|-----------------------|------------------------|------------------------------|
| Louisiana | 2016 | 4,681,346  | I           | Illegal | Illegal |                 | 0         | 0         | 0                | 0      | 0.000                 | 0.000                  | 0.000                        |
| Louisiana | 2017 | 4,673,673  | I           | Illegal | Illegal |                 | 0         | 0         | 0                | 0      | 0.000                 | 0.000                  | 0.000                        |
| Louisiana | 2018 | 4,664,450  | I           | Illegal | Illegal |                 | 0         | 0         | 0                | 0      | 0.000                 | 0.000                  | 0.000                        |
| Louisiana | 2019 | 4,658,285  | I           | Illegal | Illegal |                 | 0         | 0         | 0                | 0      | 0.000                 | 0.000                  | 0.000                        |
| Louisiana | 2020 | 4,651,664  | I           | Illegal | Illegal |                 | 0         | 0         | 0                | 0      | 0.000                 | 0.000                  | 0.000                        |
| Maine     | 2005 | 1,318,787  | R           | Legal   | Legal   | 16              | 0         | 0         | 0                | 0      | 0.000                 | 0.000                  | 0.000                        |
| Maine     | 2006 | 1,323,619  | R           | Legal   | Legal   | 15              | 0         | 0         | 0                | 0      | 0.000                 | 0.000                  | 0.000                        |
| Maine     | 2007 | 1,327,040  | R           | Legal   | Legal   | 18              | 0         | 0         | 0                | 0      | 0.000                 | 0.000                  | 0.000                        |
| Maine     | 2008 | 1,330,509  | R           | Legal   | Legal   | 29              | 0         | 0         | 0                | 0      | 0.000                 | 0.000                  | 0.000                        |
| Maine     | 2009 | 1,329,590  | R           | Legal   | Legal   | 38              | 0         | 0         | 0                | 0      | 0.000                 | 0.000                  | 0.000                        |
| Maine     | 2010 | 1,327,651  | R           | Legal   | Legal   | 42              | 0         | 0         | 0                | 0      | 0.000                 | 0.000                  | 0.000                        |
| Maine     | 2011 | 1,328,473  | R           | Legal   | Legal   | 50              | 0         | 0         | 0                | 0      | 0.000                 | 0.000                  | 0.000                        |
| Maine     | 2012 | 1,328,094  | R           | Legal   | Legal   | 57              | 0         | 0         | 0                | 0      | 0.000                 | 0.000                  | 0.000                        |
| Maine     | 2013 | 1,328,543  | R           | Legal   | Legal   | 60              | 0         | 0         | 0                | 0      | 0.000                 | 0.000                  | 0.000                        |
| Maine     | 2014 | 1,331,217  | R           | Legal   | Legal   | 60              | 1         | 4         | 0                | 0      | 0.751                 | 3.005                  | 0.000                        |
| Maine     | 2015 | 1,329,098  | R           | Legal   | Legal   | 62              | 0         | 0         | 0                | 0      | 0.000                 | 0.000                  | 0.000                        |
| Maine     | 2016 | 1,332,348  | R           | Legal   | Legal   | 67              | 0         | 0         | 0                | 0      | 0.000                 | 0.000                  | 0.000                        |
| Maine     | 2017 | 1,335,743  | R           | Legal   | Legal   | 74              | 0         | 0         | 0                | 0      | 0.000                 | 0.000                  | 0.000                        |
| Maine     | 2018 | 1,340,123  | R           | Legal   | Legal   | 61              | 0         | 0         | 0                | 0      | 0.000                 | 0.000                  | 0.000                        |
| Maine     | 2019 | 1,345,770  | R           | Legal   | Legal   | 55              | 0         | 0         | 0                | 0      | 0.000                 | 0.000                  | 0.000                        |
| Maine     | 2020 | 1,363,557  | R           | Legal   | Legal   | 59              | 1         | 4         | 0                | 0      | 0.733                 | 2.934                  | 0.000                        |
| Maryland  | 2005 | 5,592,379  | I           | Illegal | Illegal |                 | 0         | 0         | 0                | 0      | 0.000                 | 0.000                  | 0.000                        |
| Maryland  | 2006 | 5,627,367  | I           | Illegal | Illegal |                 | 0         | 0         | 0                | 0      | 0.000                 | 0.000                  | 0.000                        |
| Maryland  | 2007 | 5,653,408  | I           | Illegal | Illegal |                 | 0         | 0         | 0                | 0      | 0.000                 | 0.000                  | 0.000                        |
| Maryland  | 2008 | 5,684,965  | I           | Illegal | Illegal |                 | 0         | 0         | 0                | 0      | 0.000                 | 0.000                  | 0.000                        |
| Maryland  | 2009 | 5,730,388  | I           | Illegal | Illegal |                 | 0         | 0         | 0                | 0      | 0.000                 | 0.000                  | 0.000                        |
| Maryland  | 2010 | 5,788,784  | I           | Illegal | Illegal |                 | 0         | 0         | 0                | 0      | 0.000                 | 0.000                  | 0.000                        |
| Maryland  | 2011 | 5,840,241  | I           | Illegal | Illegal |                 | 0         | 0         | 0                | 0      | 0.000                 | 0.000                  | 0.000                        |
| Maryland  | 2012 | 5,888,375  | I           | Illegal | Illegal |                 | 0         | 0         | 0                | 0      | 0.000                 | 0.000                  | 0.000                        |
| Maryland  | 2013 | 5,925,197  | I           | Illegal | Illegal |                 | 0         | 0         | 0                | 0      | 0.000                 | 0.000                  | 0.000                        |
| Maryland  | 2014 | 5,960,064  | I           | Illegal | Illegal |                 | 0         | 0         | 0                | 0      | 0.000                 | 0.000                  | 0.000                        |
| Maryland  | 2015 | 5,988,528  | I           | Illegal | Illegal |                 | 0         | 0         | 0                | 0      | 0.000                 | 0.000                  | 0.000                        |
| Maryland  | 2016 | 6,007,014  | P           | Legal   | Illegal |                 | 0         | 0         | 0                | 0      | 0.000                 | 0.000                  | 0.000                        |
| Maryland  | 2017 | 6,028,186  | P           | Legal   | Illegal |                 | 0         | 0         | 0                | 0      | 0.000                 | 0.000                  | 0.000                        |



| State         | Year | Population | Legal Class | Def 1   | Def 2   | Number Licenses | Outbreaks | Illnesses | Hospitalizations | Deaths | Outbreak Rate Per 1MM | Illnesses Rate Per 1MM | Hospitalization Rate Per 1MM |
|---------------|------|------------|-------------|---------|---------|-----------------|-----------|-----------|------------------|--------|-----------------------|------------------------|------------------------------|
| Maryland      | 2018 | 6,042,153  | P           | Legal   | Illegal |                 | 0         | 0         | 0                | 0      | 0.000                 | 0.000                  | 0.000                        |
| Maryland      | 2019 | 6,054,954  | P           | Legal   | Illegal |                 | 0         | 0         | 0                | 0      | 0.000                 | 0.000                  | 0.000                        |
| Maryland      | 2020 | 6,173,205  | P           | Legal   | Illegal |                 | 0         | 0         | 0                | 0      | 0.000                 | 0.000                  | 0.000                        |
| Massachusetts | 2005 | 6,403,290  | F           | Legal   | Legal   | 6               | 0         | 0         | 0                | 0      | 0.000                 | 0.000                  | 0.000                        |
| Massachusetts | 2006 | 6,410,084  | F           | Legal   | Legal   | 7               | 0         | 0         | 0                | 0      | 0.000                 | 0.000                  | 0.000                        |
| Massachusetts | 2007 | 6,431,559  | F           | Legal   | Legal   | 8               | 0         | 0         | 0                | 0      | 0.000                 | 0.000                  | 0.000                        |
| Massachusetts | 2008 | 6,468,967  | F           | Legal   | Legal   | 9               | 1         | 8         | 0                | 0      | 0.155                 | 1.237                  | 0.000                        |
| Massachusetts | 2009 | 6,517,613  | F           | Legal   | Legal   | 10              | 0         | 0         | 0                | 0      | 0.000                 | 0.000                  | 0.000                        |
| Massachusetts | 2010 | 6,566,440  | F           | Legal   | Legal   | 10              | 1         | 2         | 1                | 0      | 0.152                 | 0.305                  | 0.152                        |
| Massachusetts | 2011 | 6,614,218  | F           | Legal   | Legal   | 11              | 0         | 0         | 0                | 0      | 0.000                 | 0.000                  | 0.000                        |
| Massachusetts | 2012 | 6,664,269  | F           | Legal   | Legal   | 11              | 0         | 0         | 0                | 0      | 0.000                 | 0.000                  | 0.000                        |
| Massachusetts | 2013 | 6,715,158  | F           | Legal   | Legal   | 12              | 0         | 0         | 0                | 0      | 0.000                 | 0.000                  | 0.000                        |
| Massachusetts | 2014 | 6,764,864  | F           | Legal   | Legal   | 16              | 0         | 0         | 0                | 0      | 0.000                 | 0.000                  | 0.000                        |
| Massachusetts | 2015 | 6,797,484  | F           | Legal   | Legal   | 17              | 1         | 2         | 1                | 0      | 0.147                 | 0.294                  | 0.147                        |
| Massachusetts | 2016 | 6,827,280  | F           | Legal   | Legal   | 18              | 1         | 2         | 1                | 0      | 0.146                 | 0.293                  | 0.146                        |
| Massachusetts | 2017 | 6,863,560  | F           | Legal   | Legal   | 20              | 0         | 0         | 0                | 0      | 0.000                 | 0.000                  | 0.000                        |
| Massachusetts | 2018 | 6,885,720  | F           | Legal   | Legal   | 20              | 0         | 0         | 0                | 0      | 0.000                 | 0.000                  | 0.000                        |
| Massachusetts | 2019 | 6,894,883  | F           | Legal   | Legal   | 21              | 0         | 0         | 0                | 0      | 0.000                 | 0.000                  | 0.000                        |
| Massachusetts | 2020 | 6,995,729  | F           | Legal   | Legal   | 21              | 0         | 0         | 0                | 0      | 0.000                 | 0.000                  | 0.000                        |
| Michigan      | 2005 | 10,051,137 | I           | Illegal | Illegal |                 | 0         | 0         | 0                | 0      | 0.000                 | 0.000                  | 0.000                        |
| Michigan      | 2006 | 10,036,081 | I           | Illegal | Illegal |                 | 0         | 0         | 0                | 0      | 0.000                 | 0.000                  | 0.000                        |
| Michigan      | 2007 | 10,001,284 | I           | Illegal | Illegal |                 | 0         | 0         | 0                | 0      | 0.000                 | 0.000                  | 0.000                        |
| Michigan      | 2008 | 9,946,889  | I           | Illegal | Illegal |                 | 0         | 0         | 0                | 0      | 0.000                 | 0.000                  | 0.000                        |
| Michigan      | 2009 | 9,901,591  | I           | Illegal | Illegal |                 | 0         | 0         | 0                | 0      | 0.000                 | 0.000                  | 0.000                        |
| Michigan      | 2010 | 9,877,597  | I           | Illegal | Illegal |                 | 1         | 11        | 0                | 0      | 0.101                 | 1.114                  | 0.000                        |
| Michigan      | 2011 | 9,883,053  | I           | Illegal | Illegal |                 | 2         | 7         | 1                | 0      | 0.202                 | 0.708                  | 0.101                        |
| Michigan      | 2012 | 9,898,289  | I           | Illegal | Illegal |                 | 0         | 0         | 0                | 0      | 0.000                 | 0.000                  | 0.000                        |
| Michigan      | 2013 | 9,914,802  | H           | Legal   | Legal   |                 | 0         | 0         | 0                | 0      | 0.000                 | 0.000                  | 0.000                        |
| Michigan      | 2014 | 9,932,033  | H           | Legal   | Legal   |                 | 1         | 2         | 0                | 0      | 0.101                 | 0.201                  | 0.000                        |
| Michigan      | 2015 | 9,934,483  | H           | Legal   | Legal   |                 | 1         | 6         | 1                | 0      | 0.101                 | 0.604                  | 0.101                        |
| Michigan      | 2016 | 9,954,117  | H           | Legal   | Legal   |                 | 1         | 4         | 2                | 0      | 0.100                 | 0.402                  | 0.201                        |
| Michigan      | 2017 | 9,976,752  | H           | Legal   | Legal   |                 | 0         | 0         | 0                | 0      | 0.000                 | 0.000                  | 0.000                        |
| Michigan      | 2018 | 9,987,286  | H           | Legal   | Legal   |                 | 0         | 0         | 0                | 0      | 0.000                 | 0.000                  | 0.000                        |
| Michigan      | 2019 | 9,984,795  | H           | Legal   | Legal   |                 | 0         | 0         | 0                | 0      | 0.000                 | 0.000                  | 0.000                        |

| State       | Year | Population | Legal Class | Def 1 | Def 2 | Number Licenses | Outbreaks | Illnesses | Hospitalizations | Deaths | Outbreak Rate Per 1MM | Illnesses Rate Per 1MM | Hospitalization Rate Per 1MM |
|-------------|------|------------|-------------|-------|-------|-----------------|-----------|-----------|------------------|--------|-----------------------|------------------------|------------------------------|
| Michigan    | 2020 | 10,069,577 | H           | Legal | Legal |                 | 0         | 0         | 0                | 0      | 0.000                 | 0.000                  | 0.000                        |
| Minnesota   | 2005 | 5,119,598  | F           | Legal | Legal |                 | 0         | 0         | 0                | 0      | 0.000                 | 0.000                  | 0.000                        |
| Minnesota   | 2006 | 5,163,555  | F           | Legal | Legal |                 | 0         | 0         | 0                | 0      | 0.000                 | 0.000                  | 0.000                        |
| Minnesota   | 2007 | 5,207,203  | F           | Legal | Legal |                 | 0         | 0         | 0                | 0      | 0.000                 | 0.000                  | 0.000                        |
| Minnesota   | 2008 | 5,247,018  | F           | Legal | Legal |                 | 2         | 4         | 2                | 0      | 0.381                 | 0.762                  | 0.381                        |
| Minnesota   | 2009 | 5,281,203  | F           | Legal | Legal |                 | 0         | 0         | 0                | 0      | 0.000                 | 0.000                  | 0.000                        |
| Minnesota   | 2010 | 5,310,934  | F           | Legal | Legal |                 | 2         | 15        | 5                | 0      | 0.377                 | 2.824                  | 0.941                        |
| Minnesota   | 2011 | 5,346,620  | F           | Legal | Legal |                 | 2         | 5         | 2                | 0      | 0.374                 | 0.935                  | 0.374                        |
| Minnesota   | 2012 | 5,377,500  | F           | Legal | Legal |                 | 1         | 7         | 0                | 0      | 0.186                 | 1.302                  | 0.000                        |
| Minnesota   | 2013 | 5,414,722  | F           | Legal | Legal |                 | 1         | 6         | 0                | 0      | 0.185                 | 1.108                  | 0.000                        |
| Minnesota   | 2014 | 5,452,665  | F           | Legal | Legal |                 | 1         | 9         | 2                | 0      | 0.183                 | 1.651                  | 0.367                        |
| Minnesota   | 2015 | 5,484,002  | F           | Legal | Legal |                 | 0         | 0         | 0                | 0      | 0.000                 | 0.000                  | 0.000                        |
| Minnesota   | 2016 | 5,525,360  | F           | Legal | Legal |                 | 0         | 0         | 0                | 0      | 0.000                 | 0.000                  | 0.000                        |
| Minnesota   | 2017 | 5,569,283  | F           | Legal | Legal |                 | 0         | 0         | 0                | 0      | 0.000                 | 0.000                  | 0.000                        |
| Minnesota   | 2018 | 5,608,762  | F           | Legal | Legal |                 | 0         | 0         | 0                | 0      | 0.000                 | 0.000                  | 0.000                        |
| Minnesota   | 2019 | 5,640,053  | F           | Legal | Legal |                 | 1         | 5         | 0                | 0      | 0.177                 | 0.887                  | 0.000                        |
| Minnesota   | 2020 | 5,709,852  | F           | Legal | Legal |                 | 0         | 0         | 0                | 0      | 0.000                 | 0.000                  | 0.000                        |
| Mississippi | 2005 | 2,905,943  | F           | Legal | Legal |                 | 0         | 0         | 0                | 0      | 0.000                 | 0.000                  | 0.000                        |
| Mississippi | 2006 | 2,904,978  | F           | Legal | Legal |                 | 0         | 0         | 0                | 0      | 0.000                 | 0.000                  | 0.000                        |
| Mississippi | 2007 | 2,928,350  | F           | Legal | Legal |                 | 0         | 0         | 0                | 0      | 0.000                 | 0.000                  | 0.000                        |
| Mississippi | 2008 | 2,947,806  | F           | Legal | Legal |                 | 0         | 0         | 0                | 0      | 0.000                 | 0.000                  | 0.000                        |
| Mississippi | 2009 | 2,958,774  | F           | Legal | Legal |                 | 0         | 0         | 0                | 0      | 0.000                 | 0.000                  | 0.000                        |
| Mississippi | 2010 | 2,970,615  | F           | Legal | Legal |                 | 0         | 0         | 0                | 0      | 0.000                 | 0.000                  | 0.000                        |
| Mississippi | 2011 | 2,979,147  | F           | Legal | Legal |                 | 0         | 0         | 0                | 0      | 0.000                 | 0.000                  | 0.000                        |
| Mississippi | 2012 | 2,984,599  | F           | Legal | Legal |                 | 0         | 0         | 0                | 0      | 0.000                 | 0.000                  | 0.000                        |
| Mississippi | 2013 | 2,989,839  | F           | Legal | Legal |                 | 0         | 0         | 0                | 0      | 0.000                 | 0.000                  | 0.000                        |
| Mississippi | 2014 | 2,991,892  | F           | Legal | Legal |                 | 0         | 0         | 0                | 0      | 0.000                 | 0.000                  | 0.000                        |
| Mississippi | 2015 | 2,990,231  | F           | Legal | Legal |                 | 0         | 0         | 0                | 0      | 0.000                 | 0.000                  | 0.000                        |
| Mississippi | 2016 | 2,990,595  | F           | Legal | Legal |                 | 0         | 0         | 0                | 0      | 0.000                 | 0.000                  | 0.000                        |
| Mississippi | 2017 | 2,990,674  | F           | Legal | Legal |                 | 0         | 0         | 0                | 0      | 0.000                 | 0.000                  | 0.000                        |
| Mississippi | 2018 | 2,982,879  | F           | Legal | Legal |                 | 0         | 0         | 0                | 0      | 0.000                 | 0.000                  | 0.000                        |
| Mississippi | 2019 | 2,978,227  | F           | Legal | Legal |                 | 0         | 0         | 0                | 0      | 0.000                 | 0.000                  | 0.000                        |
| Mississippi | 2020 | 2,958,141  | F           | Legal | Legal |                 | 0         | 0         | 0                | 0      | 0.000                 | 0.000                  | 0.000                        |
| Missouri    | 2005 | 5,790,300  | F           | Legal | Legal |                 | 0         | 0         | 0                | 0      | 0.000                 | 0.000                  | 0.000                        |

| State      | Year | Population | Legal Class | Def 1   | Def 2   | Number Licenses | Outbreaks | Illnesses | Hospitalizations | Deaths | Outbreak Rate Per 1MM | Illnesses Rate Per 1MM | Hospitalization Rate Per 1MM |
|------------|------|------------|-------------|---------|---------|-----------------|-----------|-----------|------------------|--------|-----------------------|------------------------|------------------------------|
| Missouri   | 2006 | 5,842,704  | F           | Legal   | Legal   |                 | 0         | 0         | 0                | 0      | 0.000                 | 0.000                  | 0.000                        |
| Missouri   | 2007 | 5,887,612  | F           | Legal   | Legal   |                 | 0         | 0         | 0                | 0      | 0.000                 | 0.000                  | 0.000                        |
| Missouri   | 2008 | 5,923,916  | F           | Legal   | Legal   |                 | 0         | 0         | 0                | 0      | 0.000                 | 0.000                  | 0.000                        |
| Missouri   | 2009 | 5,961,088  | F           | Legal   | Legal   |                 | 0         | 0         | 0                | 0      | 0.000                 | 0.000                  | 0.000                        |
| Missouri   | 2010 | 5,996,089  | F           | Legal   | Legal   |                 | 0         | 0         | 0                | 0      | 0.000                 | 0.000                  | 0.000                        |
| Missouri   | 2011 | 6,011,182  | F           | Legal   | Legal   |                 | 0         | 0         | 0                | 0      | 0.000                 | 0.000                  | 0.000                        |
| Missouri   | 2012 | 6,026,027  | F           | Legal   | Legal   |                 | 0         | 0         | 0                | 0      | 0.000                 | 0.000                  | 0.000                        |
| Missouri   | 2013 | 6,042,989  | F           | Legal   | Legal   |                 | 0         | 0         | 0                | 0      | 0.000                 | 0.000                  | 0.000                        |
| Missouri   | 2014 | 6,059,130  | F           | Legal   | Legal   |                 | 0         | 0         | 0                | 0      | 0.000                 | 0.000                  | 0.000                        |
| Missouri   | 2015 | 6,075,411  | F           | Legal   | Legal   |                 | 0         | 0         | 0                | 0      | 0.000                 | 0.000                  | 0.000                        |
| Missouri   | 2016 | 6,091,384  | F           | Legal   | Legal   |                 | 0         | 0         | 0                | 0      | 0.000                 | 0.000                  | 0.000                        |
| Missouri   | 2017 | 6,111,382  | F           | Legal   | Legal   |                 | 1         | 13        | 0                | 0      | 0.164                 | 2.127                  | 0.000                        |
| Missouri   | 2018 | 6,125,986  | F           | Legal   | Legal   |                 | 0         | 0         | 0                | 0      | 0.000                 | 0.000                  | 0.000                        |
| Missouri   | 2019 | 6,140,475  | F           | Legal   | Legal   |                 | 0         | 0         | 0                | 0      | 0.000                 | 0.000                  | 0.000                        |
| Missouri   | 2020 | 6,153,998  | F           | Legal   | Legal   |                 | 0         | 0         | 0                | 0      | 0.000                 | 0.000                  | 0.000                        |
| Montana    | 2005 | 940,102    | I           | Illegal | Illegal |                 | 0         | 0         | 0                | 0      | 0.000                 | 0.000                  | 0.000                        |
| Montana    | 2006 | 952,692    | I           | Illegal | Illegal |                 | 0         | 0         | 0                | 0      | 0.000                 | 0.000                  | 0.000                        |
| Montana    | 2007 | 964,706    | I           | Illegal | Illegal |                 | 0         | 0         | 0                | 0      | 0.000                 | 0.000                  | 0.000                        |
| Montana    | 2008 | 976,415    | I           | Illegal | Illegal |                 | 0         | 0         | 0                | 0      | 0.000                 | 0.000                  | 0.000                        |
| Montana    | 2009 | 983,982    | I           | Illegal | Illegal |                 | 0         | 0         | 0                | 0      | 0.000                 | 0.000                  | 0.000                        |
| Montana    | 2010 | 990,730    | I           | Illegal | Illegal |                 | 0         | 0         | 0                | 0      | 0.000                 | 0.000                  | 0.000                        |
| Montana    | 2011 | 997,518    | I           | Illegal | Illegal |                 | 0         | 0         | 0                | 0      | 0.000                 | 0.000                  | 0.000                        |
| Montana    | 2012 | 1,004,168  | I           | Illegal | Illegal |                 | 0         | 0         | 0                | 0      | 0.000                 | 0.000                  | 0.000                        |
| Montana    | 2013 | 1,014,158  | I           | Illegal | Illegal |                 | 0         | 0         | 0                | 0      | 0.000                 | 0.000                  | 0.000                        |
| Montana    | 2014 | 1,022,657  | I           | Illegal | Illegal |                 | 1         | 7         | 3                | 0      | 0.978                 | 6.845                  | 2.934                        |
| Montana    | 2015 | 1,031,495  | I           | Illegal | Illegal |                 | 0         | 0         | 0                | 0      | 0.000                 | 0.000                  | 0.000                        |
| Montana    | 2016 | 1,042,137  | I           | Illegal | Illegal |                 | 0         | 0         | 0                | 0      | 0.000                 | 0.000                  | 0.000                        |
| Montana    | 2017 | 1,053,862  | H           | Legal   | Legal   |                 | 0         | 0         | 0                | 0      | 0.000                 | 0.000                  | 0.000                        |
| Montana    | 2018 | 1,061,818  | H           | Legal   | Legal   |                 | 0         | 0         | 0                | 0      | 0.000                 | 0.000                  | 0.000                        |
| Montana    | 2019 | 1,070,123  | H           | Legal   | Legal   |                 | 0         | 0         | 0                | 0      | 0.000                 | 0.000                  | 0.000                        |
| Montana    | 2020 | 1,087,075  | H           | Legal   | Legal   |                 | 0         | 0         | 0                | 0      | 0.000                 | 0.000                  | 0.000                        |
| Multistate | 2005 |            |             |         |         |                 | 1         | 18        | 5                | 0      |                       |                        |                              |
| Multistate | 2006 |            |             |         |         |                 | 0         | 0         | 0                | 0      |                       |                        |                              |
| Multistate | 2007 |            |             |         |         |                 | 0         | 0         | 0                | 0      |                       |                        |                              |

| State      | Year | Population | Legal Class | Def 1   | Def 2   | Number Licenses | Outbreaks | Illnesses | Hospitalizations | Deaths | Outbreak Rate Per 1MM | Illnesses Rate Per 1MM | Hospitalization Rate Per 1MM |
|------------|------|------------|-------------|---------|---------|-----------------|-----------|-----------|------------------|--------|-----------------------|------------------------|------------------------------|
| Multistate | 2008 |            |             |         |         |                 | 1         | 65        | 1                | 0      |                       |                        |                              |
| Multistate | 2009 |            |             |         |         |                 | 0         | 0         | 0                | 0      |                       |                        |                              |
| Multistate | 2010 |            |             |         |         |                 | 0         | 0         | 0                | 0      |                       |                        |                              |
| Multistate | 2011 |            |             |         |         |                 | 0         | 0         | 0                | 0      |                       |                        |                              |
| Multistate | 2012 |            |             |         |         |                 | 1         | 16        | 4                | 0      |                       |                        |                              |
| Multistate | 2013 |            |             |         |         |                 | 0         | 0         | 0                | 0      |                       |                        |                              |
| Multistate | 2014 |            |             |         |         |                 | 1         | 2         | 2                | 1      |                       |                        |                              |
| Multistate | 2015 |            |             |         |         |                 | 0         | 0         | 0                | 0      |                       |                        |                              |
| Multistate | 2016 |            |             |         |         |                 | 0         | 0         | 0                | 0      |                       |                        |                              |
| Multistate | 2017 |            |             |         |         |                 | 0         | 0         | 0                | 0      |                       |                        |                              |
| Multistate | 2018 |            |             |         |         |                 | 0         | 0         | 0                | 0      |                       |                        |                              |
| Multistate | 2019 |            |             |         |         |                 | 0         | 0         | 0                | 0      |                       |                        |                              |
| Multistate | 2020 |            |             |         |         |                 | 0         | 0         | 0                | 0      |                       |                        |                              |
| Nebraska   | 2005 | 1,761,497  | F           | Legal   | Legal   |                 | 0         | 0         | 0                | 0      | 0.000                 | 0.000                  | 0.000                        |
| Nebraska   | 2006 | 1,772,693  | F           | Legal   | Legal   |                 | 0         | 0         | 0                | 0      | 0.000                 | 0.000                  | 0.000                        |
| Nebraska   | 2007 | 1,783,440  | F           | Legal   | Legal   |                 | 0         | 0         | 0                | 0      | 0.000                 | 0.000                  | 0.000                        |
| Nebraska   | 2008 | 1,796,378  | F           | Legal   | Legal   |                 | 0         | 0         | 0                | 0      | 0.000                 | 0.000                  | 0.000                        |
| Nebraska   | 2009 | 1,812,683  | F           | Legal   | Legal   |                 | 0         | 0         | 0                | 0      | 0.000                 | 0.000                  | 0.000                        |
| Nebraska   | 2010 | 1,829,591  | F           | Legal   | Legal   |                 | 0         | 0         | 0                | 0      | 0.000                 | 0.000                  | 0.000                        |
| Nebraska   | 2011 | 1,840,914  | F           | Legal   | Legal   |                 | 0         | 0         | 0                | 0      | 0.000                 | 0.000                  | 0.000                        |
| Nebraska   | 2012 | 1,853,691  | F           | Legal   | Legal   |                 | 0         | 0         | 0                | 0      | 0.000                 | 0.000                  | 0.000                        |
| Nebraska   | 2013 | 1,865,813  | F           | Legal   | Legal   |                 | 0         | 0         | 0                | 0      | 0.000                 | 0.000                  | 0.000                        |
| Nebraska   | 2014 | 1,879,955  | F           | Legal   | Legal   |                 | 0         | 0         | 0                | 0      | 0.000                 | 0.000                  | 0.000                        |
| Nebraska   | 2015 | 1,892,059  | F           | Legal   | Legal   |                 | 0         | 0         | 0                | 0      | 0.000                 | 0.000                  | 0.000                        |
| Nebraska   | 2016 | 1,906,483  | F           | Legal   | Legal   |                 | 0         | 0         | 0                | 0      | 0.000                 | 0.000                  | 0.000                        |
| Nebraska   | 2017 | 1,916,998  | F           | Legal   | Legal   |                 | 0         | 0         | 0                | 0      | 0.000                 | 0.000                  | 0.000                        |
| Nebraska   | 2018 | 1,925,512  | F           | Legal   | Legal   |                 | 0         | 0         | 0                | 0      | 0.000                 | 0.000                  | 0.000                        |
| Nebraska   | 2019 | 1,932,571  | F           | Legal   | Legal   |                 | 0         | 0         | 0                | 0      | 0.000                 | 0.000                  | 0.000                        |
| Nebraska   | 2020 | 1,962,642  | F           | Legal   | Legal   |                 | 0         | 0         | 0                | 0      | 0.000                 | 0.000                  | 0.000                        |
| Nevada     | 2005 | 2,432,143  | I           | Illegal | Illegal |                 | 0         | 0         | 0                | 0      | 0.000                 | 0.000                  | 0.000                        |
| Nevada     | 2006 | 2,522,658  | I           | Illegal | Illegal |                 | 0         | 0         | 0                | 0      | 0.000                 | 0.000                  | 0.000                        |
| Nevada     | 2007 | 2,601,072  | I           | Illegal | Illegal |                 | 0         | 0         | 0                | 0      | 0.000                 | 0.000                  | 0.000                        |
| Nevada     | 2008 | 2,653,630  | I           | Illegal | Illegal |                 | 0         | 0         | 0                | 0      | 0.000                 | 0.000                  | 0.000                        |
| Nevada     | 2009 | 2,684,665  | I           | Illegal | Illegal |                 | 0         | 0         | 0                | 0      | 0.000                 | 0.000                  | 0.000                        |

| State         | Year | Population | Legal Class | Def 1   | Def 2   | Number Licenses | Outbreaks | Illnesses | Hospitalizations | Deaths | Outbreak Rate Per 1MM | Illnesses Rate Per 1MM | Hospitalization Rate Per 1MM |
|---------------|------|------------|-------------|---------|---------|-----------------|-----------|-----------|------------------|--------|-----------------------|------------------------|------------------------------|
| Nevada        | 2010 | 2,702,483  | I           | Illegal | Illegal |                 | 0         | 0         | 0                | 0      | 0.000                 | 0.000                  | 0.000                        |
| Nevada        | 2011 | 2,713,114  | I           | Illegal | Illegal |                 | 0         | 0         | 0                | 0      | 0.000                 | 0.000                  | 0.000                        |
| Nevada        | 2012 | 2,744,670  | I           | Illegal | Illegal |                 | 0         | 0         | 0                | 0      | 0.000                 | 0.000                  | 0.000                        |
| Nevada        | 2013 | 2,776,956  | I           | Illegal | Illegal |                 | 0         | 0         | 0                | 0      | 0.000                 | 0.000                  | 0.000                        |
| Nevada        | 2014 | 2,818,935  | I           | Illegal | Illegal |                 | 0         | 0         | 0                | 0      | 0.000                 | 0.000                  | 0.000                        |
| Nevada        | 2015 | 2,868,531  | I           | Illegal | Illegal |                 | 0         | 0         | 0                | 0      | 0.000                 | 0.000                  | 0.000                        |
| Nevada        | 2016 | 2,919,555  | I           | Illegal | Illegal |                 | 0         | 0         | 0                | 0      | 0.000                 | 0.000                  | 0.000                        |
| Nevada        | 2017 | 2,972,097  | I           | Illegal | Illegal |                 | 0         | 0         | 0                | 0      | 0.000                 | 0.000                  | 0.000                        |
| Nevada        | 2018 | 3,030,725  | I           | Illegal | Illegal |                 | 0         | 0         | 0                | 0      | 0.000                 | 0.000                  | 0.000                        |
| Nevada        | 2019 | 3,090,771  | I           | Illegal | Illegal |                 | 0         | 0         | 0                | 0      | 0.000                 | 0.000                  | 0.000                        |
| Nevada        | 2020 | 3,115,648  | I           | Illegal | Illegal |                 | 0         | 0         | 0                | 0      | 0.000                 | 0.000                  | 0.000                        |
| New Hampshire | 2005 | 1,298,492  | R           | Legal   | Legal   |                 | 0         | 0         | 0                | 0      | 0.000                 | 0.000                  | 0.000                        |
| New Hampshire | 2006 | 1,308,389  | R           | Legal   | Legal   |                 | 0         | 0         | 0                | 0      | 0.000                 | 0.000                  | 0.000                        |
| New Hampshire | 2007 | 1,312,540  | R           | Legal   | Legal   |                 | 0         | 0         | 0                | 0      | 0.000                 | 0.000                  | 0.000                        |
| New Hampshire | 2008 | 1,315,906  | R           | Legal   | Legal   |                 | 0         | 0         | 0                | 0      | 0.000                 | 0.000                  | 0.000                        |
| New Hampshire | 2009 | 1,316,102  | R           | Legal   | Legal   |                 | 0         | 0         | 0                | 0      | 0.000                 | 0.000                  | 0.000                        |
| New Hampshire | 2010 | 1,316,807  | R           | Legal   | Legal   |                 | 0         | 0         | 0                | 0      | 0.000                 | 0.000                  | 0.000                        |
| New Hampshire | 2011 | 1,320,444  | R           | Legal   | Legal   |                 | 0         | 0         | 0                | 0      | 0.000                 | 0.000                  | 0.000                        |
| New Hampshire | 2012 | 1,324,677  | R           | Legal   | Legal   |                 | 0         | 0         | 0                | 0      | 0.000                 | 0.000                  | 0.000                        |
| New Hampshire | 2013 | 1,327,272  | R           | Legal   | Legal   |                 | 0         | 0         | 0                | 0      | 0.000                 | 0.000                  | 0.000                        |
| New Hampshire | 2014 | 1,334,257  | R           | Legal   | Legal   |                 | 0         | 0         | 0                | 0      | 0.000                 | 0.000                  | 0.000                        |
| New Hampshire | 2015 | 1,337,480  | R           | Legal   | Legal   |                 | 0         | 0         | 0                | 0      | 0.000                 | 0.000                  | 0.000                        |
| New Hampshire | 2016 | 1,343,694  | R           | Legal   | Legal   |                 | 0         | 0         | 0                | 0      | 0.000                 | 0.000                  | 0.000                        |
| New Hampshire | 2017 | 1,350,395  | R           | Legal   | Legal   |                 | 0         | 0         | 0                | 0      | 0.000                 | 0.000                  | 0.000                        |
| New Hampshire | 2018 | 1,355,064  | R           | Legal   | Legal   |                 | 1         | 3         | 0                | 0      | 0.738                 | 2.214                  | 0.000                        |
| New Hampshire | 2019 | 1,360,783  | R           | Legal   | Legal   |                 | 1         | 2         | 1                | 0      | 0.735                 | 1.470                  | 0.735                        |
| New Hampshire | 2020 | 1,378,587  | R           | Legal   | Legal   |                 | 0         | 0         | 0                | 0      | 0.000                 | 0.000                  | 0.000                        |
| New Jersey    | 2005 | 8,651,974  | I           | Illegal | Illegal |                 | 0         | 0         | 0                | 0      | 0.000                 | 0.000                  | 0.000                        |
| New Jersey    | 2006 | 8,661,679  | I           | Illegal | Illegal |                 | 0         | 0         | 0                | 0      | 0.000                 | 0.000                  | 0.000                        |
| New Jersey    | 2007 | 8,677,885  | I           | Illegal | Illegal |                 | 0         | 0         | 0                | 0      | 0.000                 | 0.000                  | 0.000                        |
| New Jersey    | 2008 | 8,711,090  | I           | Illegal | Illegal |                 | 0         | 0         | 0                | 0      | 0.000                 | 0.000                  | 0.000                        |
| New Jersey    | 2009 | 8,755,602  | I           | Illegal | Illegal |                 | 0         | 0         | 0                | 0      | 0.000                 | 0.000                  | 0.000                        |
| New Jersey    | 2010 | 8,799,451  | I           | Illegal | Illegal |                 | 0         | 0         | 0                | 0      | 0.000                 | 0.000                  | 0.000                        |
| New Jersey    | 2011 | 8,828,552  | I           | Illegal | Illegal |                 | 0         | 0         | 0                | 0      | 0.000                 | 0.000                  | 0.000                        |

| State      | Year | Population | Legal Class | Def 1   | Def 2   | Number Licenses | Outbreaks | Illnesses | Hospitalizations | Deaths | Outbreak Rate Per 1MM | Illnesses Rate Per 1MM | Hospitalization Rate Per 1MM |
|------------|------|------------|-------------|---------|---------|-----------------|-----------|-----------|------------------|--------|-----------------------|------------------------|------------------------------|
| New Jersey | 2012 | 8,845,671  | I           | Illegal | Illegal |                 | 0         | 0         | 0                | 0      | 0.000                 | 0.000                  | 0.000                        |
| New Jersey | 2013 | 8,857,821  | I           | Illegal | Illegal |                 | 0         | 0         | 0                | 0      | 0.000                 | 0.000                  | 0.000                        |
| New Jersey | 2014 | 8,867,277  | I           | Illegal | Illegal |                 | 0         | 0         | 0                | 0      | 0.000                 | 0.000                  | 0.000                        |
| New Jersey | 2015 | 8,870,312  | I           | Illegal | Illegal |                 | 0         | 0         | 0                | 0      | 0.000                 | 0.000                  | 0.000                        |
| New Jersey | 2016 | 8,873,584  | I           | Illegal | Illegal |                 | 0         | 0         | 0                | 0      | 0.000                 | 0.000                  | 0.000                        |
| New Jersey | 2017 | 8,888,147  | I           | Illegal | Illegal |                 | 0         | 0         | 0                | 0      | 0.000                 | 0.000                  | 0.000                        |
| New Jersey | 2018 | 8,891,730  | I           | Illegal | Illegal |                 | 0         | 0         | 0                | 0      | 0.000                 | 0.000                  | 0.000                        |
| New Jersey | 2019 | 8,891,258  | I           | Illegal | Illegal |                 | 0         | 0         | 0                | 0      | 0.000                 | 0.000                  | 0.000                        |
| New Jersey | 2020 | 9,271,689  | I           | Illegal | Illegal |                 | 0         | 0         | 0                | 0      | 0.000                 | 0.000                  | 0.000                        |
| New Mexico | 2005 | 1,932,274  | R           | Legal   | Legal   |                 | 0         | 0         | 0                | 0      | 0.000                 | 0.000                  | 0.000                        |
| New Mexico | 2006 | 1,962,137  | R           | Legal   | Legal   |                 | 0         | 0         | 0                | 0      | 0.000                 | 0.000                  | 0.000                        |
| New Mexico | 2007 | 1,990,070  | R           | Legal   | Legal   |                 | 0         | 0         | 0                | 0      | 0.000                 | 0.000                  | 0.000                        |
| New Mexico | 2008 | 2,010,662  | R           | Legal   | Legal   |                 | 0         | 0         | 0                | 0      | 0.000                 | 0.000                  | 0.000                        |
| New Mexico | 2009 | 2,036,802  | R           | Legal   | Legal   |                 | 0         | 0         | 0                | 0      | 0.000                 | 0.000                  | 0.000                        |
| New Mexico | 2010 | 2,064,614  | R           | Legal   | Legal   |                 | 0         | 0         | 0                | 0      | 0.000                 | 0.000                  | 0.000                        |
| New Mexico | 2011 | 2,080,707  | R           | Legal   | Legal   |                 | 0         | 0         | 0                | 0      | 0.000                 | 0.000                  | 0.000                        |
| New Mexico | 2012 | 2,087,715  | R           | Legal   | Legal   |                 | 0         | 0         | 0                | 0      | 0.000                 | 0.000                  | 0.000                        |
| New Mexico | 2013 | 2,092,833  | R           | Legal   | Legal   |                 | 0         | 0         | 0                | 0      | 0.000                 | 0.000                  | 0.000                        |
| New Mexico | 2014 | 2,090,236  | R           | Legal   | Legal   |                 | 0         | 0         | 0                | 0      | 0.000                 | 0.000                  | 0.000                        |
| New Mexico | 2015 | 2,090,071  | R           | Legal   | Legal   |                 | 0         | 0         | 0                | 0      | 0.000                 | 0.000                  | 0.000                        |
| New Mexico | 2016 | 2,092,555  | R           | Legal   | Legal   |                 | 1         | 6         | 0                | 0      | 0.478                 | 2.867                  | 0.000                        |
| New Mexico | 2017 | 2,092,844  | R           | Legal   | Legal   |                 | 0         | 0         | 0                | 0      | 0.000                 | 0.000                  | 0.000                        |
| New Mexico | 2018 | 2,093,754  | R           | Legal   | Legal   |                 | 0         | 0         | 0                | 0      | 0.000                 | 0.000                  | 0.000                        |
| New Mexico | 2019 | 2,099,634  | R           | Legal   | Legal   |                 | 0         | 0         | 0                | 0      | 0.000                 | 0.000                  | 0.000                        |
| New Mexico | 2020 | 2,118,390  | R           | Legal   | Legal   |                 | 0         | 0         | 0                | 0      | 0.000                 | 0.000                  | 0.000                        |
| New York   | 2005 | 19,132,610 | F           | Legal   | Legal   | 10              | 0         | 0         | 0                | 0      | 0.000                 | 0.000                  | 0.000                        |
| New York   | 2006 | 19,104,631 | F           | Legal   | Legal   | 12              | 1         | 2         | 0                | 0      | 0.052                 | 0.105                  | 0.000                        |
| New York   | 2007 | 19,132,335 | F           | Legal   | Legal   | 23              | 1         | 2         | 1                | 0      | 0.052                 | 0.105                  | 0.052                        |
| New York   | 2008 | 19,212,436 | F           | Legal   | Legal   | 0               | 0         | 0         | 0                | 0      | 0.000                 | 0.000                  | 0.000                        |
| New York   | 2009 | 19,307,066 | F           | Legal   | Legal   | 0               | 0         | 0         | 0                | 0      | 0.000                 | 0.000                  | 0.000                        |
| New York   | 2010 | 19,399,956 | F           | Legal   | Legal   | 34              | 1         | 20        | 1                | 0      | 0.052                 | 1.031                  | 0.052                        |
| New York   | 2011 | 19,499,921 | F           | Legal   | Legal   | 36              | 3         | 20        | 0                | 0      | 0.154                 | 1.026                  | 0.000                        |
| New York   | 2012 | 19,574,362 | F           | Legal   | Legal   | 42              | 1         | 6         | 2                | 0      | 0.051                 | 0.307                  | 0.102                        |
| New York   | 2013 | 19,626,488 | F           | Legal   | Legal   | 48              | 0         | 0         | 0                | 0      | 0.000                 | 0.000                  | 0.000                        |

| State          | Year | Population | Legal Class | Def 1   | Def 2   | Number Licenses | Outbreaks | Illnesses | Hospitalizations | Deaths | Outbreak Rate Per 1MM | Illnesses Rate Per 1MM | Hospitalization Rate Per 1MM |
|----------------|------|------------|-------------|---------|---------|-----------------|-----------|-----------|------------------|--------|-----------------------|------------------------|------------------------------|
| New York       | 2014 | 19,653,431 | F           | Legal   | Legal   | 46              | 1         | 8         | 0                | 0      | 0.051                 | 0.407                  | 0.000                        |
| New York       | 2015 | 19,657,321 | F           | Legal   | Legal   | 45              | 0         | 0         | 0                | 0      | 0.000                 | 0.000                  | 0.000                        |
| New York       | 2016 | 19,636,391 | F           | Legal   | Legal   | 50              | 0         | 0         | 0                | 0      | 0.000                 | 0.000                  | 0.000                        |
| New York       | 2017 | 19,593,849 | F           | Legal   | Legal   | 55              | 0         | 0         | 0                | 0      | 0.000                 | 0.000                  | 0.000                        |
| New York       | 2018 | 19,544,098 | F           | Legal   | Legal   | 59              | 0         | 0         | 0                | 0      | 0.000                 | 0.000                  | 0.000                        |
| New York       | 2019 | 19,463,131 | F           | Legal   | Legal   | 64              | 0         | 0         | 0                | 0      | 0.000                 | 0.000                  | 0.000                        |
| New York       | 2020 | 20,108,296 | F           | Legal   | Legal   | 74              | 0         | 0         | 0                | 0      | 0.000                 | 0.000                  | 0.000                        |
| North Carolina | 2005 | 8,705,407  | P           | Legal   | Illegal |                 | 0         | 0         | 0                | 0      | 0.000                 | 0.000                  | 0.000                        |
| North Carolina | 2006 | 8,917,270  | P           | Legal   | Illegal |                 | 0         | 0         | 0                | 0      | 0.000                 | 0.000                  | 0.000                        |
| North Carolina | 2007 | 9,118,037  | P           | Legal   | Illegal |                 | 0         | 0         | 0                | 0      | 0.000                 | 0.000                  | 0.000                        |
| North Carolina | 2008 | 9,309,449  | P           | Legal   | Illegal |                 | 0         | 0         | 0                | 0      | 0.000                 | 0.000                  | 0.000                        |
| North Carolina | 2009 | 9,449,566  | P           | Legal   | Illegal |                 | 0         | 0         | 0                | 0      | 0.000                 | 0.000                  | 0.000                        |
| North Carolina | 2010 | 9,574,586  | P           | Legal   | Illegal |                 | 0         | 0         | 0                | 0      | 0.000                 | 0.000                  | 0.000                        |
| North Carolina | 2011 | 9,658,913  | P           | Legal   | Illegal |                 | 1         | 3         | 0                | 0      | 0.104                 | 0.311                  | 0.000                        |
| North Carolina | 2012 | 9,751,810  | P           | Legal   | Illegal |                 | 0         | 0         | 0                | 0      | 0.000                 | 0.000                  | 0.000                        |
| North Carolina | 2013 | 9,846,717  | P           | Legal   | Illegal |                 | 0         | 0         | 0                | 0      | 0.000                 | 0.000                  | 0.000                        |
| North Carolina | 2014 | 9,937,295  | P           | Legal   | Illegal |                 | 0         | 0         | 0                | 0      | 0.000                 | 0.000                  | 0.000                        |
| North Carolina | 2015 | 10,037,218 | P           | Legal   | Illegal |                 | 0         | 0         | 0                | 0      | 0.000                 | 0.000                  | 0.000                        |
| North Carolina | 2016 | 10,161,802 | P           | Legal   | Illegal |                 | 0         | 0         | 0                | 0      | 0.000                 | 0.000                  | 0.000                        |
| North Carolina | 2017 | 10,275,758 | P           | Legal   | Illegal |                 | 0         | 0         | 0                | 0      | 0.000                 | 0.000                  | 0.000                        |
| North Carolina | 2018 | 10,391,358 | H           | Legal   | Legal   |                 | 0         | 0         | 0                | 0      | 0.000                 | 0.000                  | 0.000                        |
| North Carolina | 2019 | 10,501,384 | H           | Legal   | Legal   |                 | 0         | 0         | 0                | 0      | 0.000                 | 0.000                  | 0.000                        |
| North Carolina | 2020 | 10,449,445 | H           | Legal   | Legal   |                 | 0         | 0         | 0                | 0      | 0.000                 | 0.000                  | 0.000                        |
| North Dakota   | 2005 | 646,089    | I           | Illegal | Illegal |                 | 0         | 0         | 0                | 0      | 0.000                 | 0.000                  | 0.000                        |
| North Dakota   | 2006 | 649,422    | I           | Illegal | Illegal |                 | 0         | 0         | 0                | 0      | 0.000                 | 0.000                  | 0.000                        |
| North Dakota   | 2007 | 652,822    | I           | Illegal | Illegal |                 | 0         | 0         | 0                | 0      | 0.000                 | 0.000                  | 0.000                        |
| North Dakota   | 2008 | 657,569    | I           | Illegal | Illegal |                 | 1         | 3         | 0                | 0      | 1.521                 | 4.562                  | 0.000                        |
| North Dakota   | 2009 | 664,968    | I           | Illegal | Illegal |                 | 0         | 0         | 0                | 0      | 0.000                 | 0.000                  | 0.000                        |
| North Dakota   | 2010 | 674,752    | I           | Illegal | Illegal |                 | 1         | 7         | 0                | 0      | 1.482                 | 10.374                 | 0.000                        |
| North Dakota   | 2011 | 685,526    | I           | Illegal | Illegal |                 | 0         | 0         | 0                | 0      | 0.000                 | 0.000                  | 0.000                        |
| North Dakota   | 2012 | 702,227    | I           | Illegal | Illegal |                 | 0         | 0         | 0                | 0      | 0.000                 | 0.000                  | 0.000                        |
| North Dakota   | 2013 | 723,149    | H           | Legal   | Legal   |                 | 0         | 0         | 0                | 0      | 0.000                 | 0.000                  | 0.000                        |
| North Dakota   | 2014 | 738,736    | H           | Legal   | Legal   |                 | 0         | 0         | 0                | 0      | 0.000                 | 0.000                  | 0.000                        |
| North Dakota   | 2015 | 755,537    | H           | Legal   | Legal   |                 | 0         | 0         | 0                | 0      | 0.000                 | 0.000                  | 0.000                        |

| State        | Year | Population | Legal Class | Def 1   | Def 2   | Number Licenses | Outbreaks | Illnesses | Hospitalizations | Deaths | Outbreak Rate Per 1MM | Illnesses Rate Per 1MM | Hospitalization Rate Per 1MM |
|--------------|------|------------|-------------|---------|---------|-----------------|-----------|-----------|------------------|--------|-----------------------|------------------------|------------------------------|
| North Dakota | 2016 | 756,114    | H           | Legal   | Legal   |                 | 0         | 0         | 0                | 0      | 0.000                 | 0.000                  | 0.000                        |
| North Dakota | 2017 | 756,755    | H           | Legal   | Legal   |                 | 0         | 0         | 0                | 0      | 0.000                 | 0.000                  | 0.000                        |
| North Dakota | 2018 | 760,062    | H           | Legal   | Legal   |                 | 0         | 0         | 0                | 0      | 0.000                 | 0.000                  | 0.000                        |
| North Dakota | 2019 | 763,724    | H           | Legal   | Legal   |                 | 0         | 0         | 0                | 0      | 0.000                 | 0.000                  | 0.000                        |
| North Dakota | 2020 | 779,518    | H           | Legal   | Legal   |                 | 0         | 0         | 0                | 0      | 0.000                 | 0.000                  | 0.000                        |
| Ohio         | 2005 | 11,463,320 | I           | Illegal | Illegal |                 | 0         | 0         | 0                | 0      | 0.000                 | 0.000                  | 0.000                        |
| Ohio         | 2006 | 11,481,213 | H           | Legal   | Legal   |                 | 1         | 3         | 1                | 0      | 0.087                 | 0.261                  | 0.087                        |
| Ohio         | 2007 | 11,500,468 | H           | Legal   | Legal   |                 | 0         | 0         | 0                | 0      | 0.000                 | 0.000                  | 0.000                        |
| Ohio         | 2008 | 11,515,391 | H           | Legal   | Legal   |                 | 1         | 3         | 0                | 0      | 0.087                 | 0.261                  | 0.000                        |
| Ohio         | 2009 | 11,528,896 | H           | Legal   | Legal   |                 | 0         | 0         | 0                | 0      | 0.000                 | 0.000                  | 0.000                        |
| Ohio         | 2010 | 11,539,449 | H           | Legal   | Legal   |                 | 0         | 0         | 0                | 0      | 0.000                 | 0.000                  | 0.000                        |
| Ohio         | 2011 | 11,545,735 | H           | Legal   | Legal   |                 | 0         | 0         | 0                | 0      | 0.000                 | 0.000                  | 0.000                        |
| Ohio         | 2012 | 11,550,971 | H           | Legal   | Legal   |                 | 2         | 6         | 0                | 0      | 0.173                 | 0.519                  | 0.000                        |
| Ohio         | 2013 | 11,579,692 | H           | Legal   | Legal   |                 | 2         | 11        | 1                | 0      | 0.173                 | 0.950                  | 0.086                        |
| Ohio         | 2014 | 11,606,573 | H           | Legal   | Legal   |                 | 1         | 3         | 0                | 0      | 0.086                 | 0.258                  | 0.000                        |
| Ohio         | 2015 | 11,622,315 | H           | Legal   | Legal   |                 | 1         | 2         | 2                | 0      | 0.086                 | 0.172                  | 0.172                        |
| Ohio         | 2016 | 11,640,060 | H           | Legal   | Legal   |                 | 2         | 13        | 2                | 0      | 0.172                 | 1.117                  | 0.172                        |
| Ohio         | 2017 | 11,665,706 | H           | Legal   | Legal   |                 | 1         | 2         | 0                | 0      | 0.086                 | 0.171                  | 0.000                        |
| Ohio         | 2018 | 11,680,892 | H           | Legal   | Legal   |                 | 0         | 0         | 0                | 0      | 0.000                 | 0.000                  | 0.000                        |
| Ohio         | 2019 | 11,696,507 | H           | Legal   | Legal   |                 | 1         | 7         | 1                | 0      | 0.085                 | 0.598                  | 0.085                        |
| Ohio         | 2020 | 11,797,517 | H           | Legal   | Legal   |                 | 0         | 0         | 0                | 0      | 0.000                 | 0.000                  | 0.000                        |
| Oklahoma     | 2005 | 3,548,597  | F           | Legal   | Legal   |                 | 0         | 0         | 0                | 0      | 0.000                 | 0.000                  | 0.000                        |
| Oklahoma     | 2006 | 3,594,090  | F           | Legal   | Legal   |                 | 0         | 0         | 0                | 0      | 0.000                 | 0.000                  | 0.000                        |
| Oklahoma     | 2007 | 3,634,349  | F           | Legal   | Legal   |                 | 0         | 0         | 0                | 0      | 0.000                 | 0.000                  | 0.000                        |
| Oklahoma     | 2008 | 3,668,976  | F           | Legal   | Legal   |                 | 0         | 0         | 0                | 0      | 0.000                 | 0.000                  | 0.000                        |
| Oklahoma     | 2009 | 3,717,572  | F           | Legal   | Legal   |                 | 0         | 0         | 0                | 0      | 0.000                 | 0.000                  | 0.000                        |
| Oklahoma     | 2010 | 3,760,014  | F           | Legal   | Legal   |                 | 0         | 0         | 0                | 0      | 0.000                 | 0.000                  | 0.000                        |
| Oklahoma     | 2011 | 3,788,824  | F           | Legal   | Legal   |                 | 0         | 0         | 0                | 0      | 0.000                 | 0.000                  | 0.000                        |
| Oklahoma     | 2012 | 3,819,320  | F           | Legal   | Legal   |                 | 0         | 0         | 0                | 0      | 0.000                 | 0.000                  | 0.000                        |
| Oklahoma     | 2013 | 3,853,891  | F           | Legal   | Legal   |                 | 0         | 0         | 0                | 0      | 0.000                 | 0.000                  | 0.000                        |
| Oklahoma     | 2014 | 3,879,187  | F           | Legal   | Legal   |                 | 0         | 0         | 0                | 0      | 0.000                 | 0.000                  | 0.000                        |
| Oklahoma     | 2015 | 3,910,518  | F           | Legal   | Legal   |                 | 0         | 0         | 0                | 0      | 0.000                 | 0.000                  | 0.000                        |
| Oklahoma     | 2016 | 3,928,143  | F           | Legal   | Legal   |                 | 0         | 0         | 0                | 0      | 0.000                 | 0.000                  | 0.000                        |
| Oklahoma     | 2017 | 3,933,602  | F           | Legal   | Legal   |                 | 0         | 0         | 0                | 0      | 0.000                 | 0.000                  | 0.000                        |



| State        | Year | Population | Legal Class | Def 1 | Def 2 | Number Licenses | Outbreaks | Illnesses | Hospitalizations | Deaths | Outbreak Rate Per 1MM | Illnesses Rate Per 1MM | Hospitalization Rate Per 1MM |
|--------------|------|------------|-------------|-------|-------|-----------------|-----------|-----------|------------------|--------|-----------------------|------------------------|------------------------------|
| Oklahoma     | 2018 | 3,943,488  | F           | Legal | Legal |                 | 0         | 0         | 0                | 0      | 0.000                 | 0.000                  | 0.000                        |
| Oklahoma     | 2019 | 3,960,676  | F           | Legal | Legal |                 | 0         | 0         | 0                | 0      | 0.000                 | 0.000                  | 0.000                        |
| Oklahoma     | 2020 | 3,964,912  | F           | Legal | Legal |                 | 1         | 8         | 0                | 0      | 0.252                 | 2.018                  | 0.000                        |
| Oregon       | 2005 | 3,613,202  | R           | Legal | Legal |                 | 0         | 0         | 0                | 0      | 0.000                 | 0.000                  | 0.000                        |
| Oregon       | 2006 | 3,670,883  | R           | Legal | Legal |                 | 0         | 0         | 0                | 0      | 0.000                 | 0.000                  | 0.000                        |
| Oregon       | 2007 | 3,722,417  | R           | Legal | Legal |                 | 0         | 0         | 0                | 0      | 0.000                 | 0.000                  | 0.000                        |
| Oregon       | 2008 | 3,768,748  | R           | Legal | Legal |                 | 0         | 0         | 0                | 0      | 0.000                 | 0.000                  | 0.000                        |
| Oregon       | 2009 | 3,808,600  | R           | Legal | Legal |                 | 0         | 0         | 0                | 0      | 0.000                 | 0.000                  | 0.000                        |
| Oregon       | 2010 | 3,837,614  | R           | Legal | Legal |                 | 0         | 0         | 0                | 0      | 0.000                 | 0.000                  | 0.000                        |
| Oregon       | 2011 | 3,872,672  | R           | Legal | Legal |                 | 0         | 0         | 0                | 0      | 0.000                 | 0.000                  | 0.000                        |
| Oregon       | 2012 | 3,900,102  | R           | Legal | Legal |                 | 0         | 0         | 0                | 0      | 0.000                 | 0.000                  | 0.000                        |
| Oregon       | 2013 | 3,924,110  | R           | Legal | Legal |                 | 0         | 0         | 0                | 0      | 0.000                 | 0.000                  | 0.000                        |
| Oregon       | 2014 | 3,965,447  | R           | Legal | Legal |                 | 0         | 0         | 0                | 0      | 0.000                 | 0.000                  | 0.000                        |
| Oregon       | 2015 | 4,018,542  | R           | Legal | Legal |                 | 0         | 0         | 0                | 0      | 0.000                 | 0.000                  | 0.000                        |
| Oregon       | 2016 | 4,093,271  | R           | Legal | Legal |                 | 0         | 0         | 0                | 0      | 0.000                 | 0.000                  | 0.000                        |
| Oregon       | 2017 | 4,147,294  | R           | Legal | Legal |                 | 0         | 0         | 0                | 0      | 0.000                 | 0.000                  | 0.000                        |
| Oregon       | 2018 | 4,183,538  | R           | Legal | Legal |                 | 0         | 0         | 0                | 0      | 0.000                 | 0.000                  | 0.000                        |
| Oregon       | 2019 | 4,216,116  | R           | Legal | Legal |                 | 0         | 0         | 0                | 0      | 0.000                 | 0.000                  | 0.000                        |
| Oregon       | 2020 | 4,244,795  | R           | Legal | Legal |                 | 1         | 4         | 1                | 0      | 0.236                 | 0.942                  | 0.236                        |
| Pennsylvania | 2005 | 12,449,990 | R           | Legal | Legal |                 | 0         | 0         | 0                | 0      | 0.000                 | 0.000                  | 0.000                        |
| Pennsylvania | 2006 | 12,510,809 | R           | Legal | Legal |                 | 0         | 0         | 0                | 0      | 0.000                 | 0.000                  | 0.000                        |
| Pennsylvania | 2007 | 12,563,937 | R           | Legal | Legal |                 | 1         | 4         | 0                | 0      | 0.080                 | 0.318                  | 0.000                        |
| Pennsylvania | 2008 | 12,612,285 | R           | Legal | Legal |                 | 0         | 0         | 0                | 0      | 0.000                 | 0.000                  | 0.000                        |
| Pennsylvania | 2009 | 12,666,858 | R           | Legal | Legal |                 | 2         | 11        | 1                | 0      | 0.158                 | 0.868                  | 0.079                        |
| Pennsylvania | 2010 | 12,711,406 | R           | Legal | Legal |                 | 2         | 26        | 4                | 0      | 0.157                 | 2.045                  | 0.315                        |
| Pennsylvania | 2011 | 12,747,052 | R           | Legal | Legal |                 | 2         | 8         | 0                | 0      | 0.157                 | 0.628                  | 0.000                        |
| Pennsylvania | 2012 | 12,769,123 | R           | Legal | Legal |                 | 4         | 163       | 9                | 0      | 0.313                 | 12.765                 | 0.705                        |
| Pennsylvania | 2013 | 12,779,538 | R           | Legal | Legal |                 | 4         | 23        | 3                | 0      | 0.313                 | 1.800                  | 0.235                        |
| Pennsylvania | 2014 | 12,792,392 | R           | Legal | Legal |                 | 2         | 4         | 0                | 0      | 0.156                 | 0.313                  | 0.000                        |
| Pennsylvania | 2015 | 12,789,838 | R           | Legal | Legal |                 | 0         | 0         | 0                | 0      | 0.000                 | 0.000                  | 0.000                        |
| Pennsylvania | 2016 | 12,788,468 | R           | Legal | Legal |                 | 0         | 0         | 0                | 0      | 0.000                 | 0.000                  | 0.000                        |
| Pennsylvania | 2017 | 12,794,679 | R           | Legal | Legal |                 | 1         | 5         | 0                | 0      | 0.078                 | 0.391                  | 0.000                        |
| Pennsylvania | 2018 | 12,809,107 | R           | Legal | Legal |                 | 3         | 39        | 3                | 0      | 0.234                 | 3.045                  | 0.234                        |
| Pennsylvania | 2019 | 12,798,883 | R           | Legal | Legal |                 | 0         | 0         | 0                | 0      | 0.000                 | 0.000                  | 0.000                        |

| State          | Year | Population | Legal Class | Def 1   | Def 2   | Number Licenses | Outbreaks | Illnesses | Hospitalizations | Deaths | Outbreak Rate Per 1MM | Illnesses Rate Per 1MM | Hospitalization Rate Per 1MM |
|----------------|------|------------|-------------|---------|---------|-----------------|-----------|-----------|------------------|--------|-----------------------|------------------------|------------------------------|
| Pennsylvania   | 2020 | 12,994,440 | R           | Legal   | Legal   |                 | 1         | 3         | 0                | 0      | 0.077                 | 0.231                  | 0.000                        |
| Rhode Island   | 2005 | 1,067,916  | I           | Illegal | Illegal |                 | 0         | 0         | 0                | 0      | 0.000                 | 0.000                  | 0.000                        |
| Rhode Island   | 2006 | 1,063,096  | I           | Illegal | Illegal |                 | 0         | 0         | 0                | 0      | 0.000                 | 0.000                  | 0.000                        |
| Rhode Island   | 2007 | 1,057,315  | I           | Illegal | Illegal |                 | 0         | 0         | 0                | 0      | 0.000                 | 0.000                  | 0.000                        |
| Rhode Island   | 2008 | 1,055,003  | I           | Illegal | Illegal |                 | 0         | 0         | 0                | 0      | 0.000                 | 0.000                  | 0.000                        |
| Rhode Island   | 2009 | 1,053,646  | I           | Illegal | Illegal |                 | 0         | 0         | 0                | 0      | 0.000                 | 0.000                  | 0.000                        |
| Rhode Island   | 2010 | 1,053,994  | I           | Illegal | Illegal |                 | 0         | 0         | 0                | 0      | 0.000                 | 0.000                  | 0.000                        |
| Rhode Island   | 2011 | 1,053,829  | I           | Illegal | Illegal |                 | 0         | 0         | 0                | 0      | 0.000                 | 0.000                  | 0.000                        |
| Rhode Island   | 2012 | 1,054,893  | I           | Illegal | Illegal |                 | 0         | 0         | 0                | 0      | 0.000                 | 0.000                  | 0.000                        |
| Rhode Island   | 2013 | 1,055,560  | I           | Illegal | Illegal |                 | 0         | 0         | 0                | 0      | 0.000                 | 0.000                  | 0.000                        |
| Rhode Island   | 2014 | 1,056,511  | I           | Illegal | Illegal |                 | 0         | 0         | 0                | 0      | 0.000                 | 0.000                  | 0.000                        |
| Rhode Island   | 2015 | 1,056,886  | I           | Illegal | Illegal |                 | 0         | 0         | 0                | 0      | 0.000                 | 0.000                  | 0.000                        |
| Rhode Island   | 2016 | 1,057,816  | I           | Illegal | Illegal |                 | 0         | 0         | 0                | 0      | 0.000                 | 0.000                  | 0.000                        |
| Rhode Island   | 2017 | 1,056,554  | I           | Illegal | Illegal |                 | 0         | 0         | 0                | 0      | 0.000                 | 0.000                  | 0.000                        |
| Rhode Island   | 2018 | 1,059,338  | I           | Illegal | Illegal |                 | 0         | 0         | 0                | 0      | 0.000                 | 0.000                  | 0.000                        |
| Rhode Island   | 2019 | 1,058,158  | I           | Illegal | Illegal |                 | 0         | 0         | 0                | 0      | 0.000                 | 0.000                  | 0.000                        |
| Rhode Island   | 2020 | 1,096,345  | I           | Illegal | Illegal |                 | 0         | 0         | 0                | 0      | 0.000                 | 0.000                  | 0.000                        |
| South Carolina | 2005 | 4,270,150  | F           | Legal   | Legal   |                 | 0         | 0         | 0                | 0      | 0.000                 | 0.000                  | 0.000                        |
| South Carolina | 2006 | 4,357,847  | F           | Legal   | Legal   |                 | 0         | 0         | 0                | 0      | 0.000                 | 0.000                  | 0.000                        |
| South Carolina | 2007 | 4,444,110  | F           | Legal   | Legal   |                 | 1         | 11        | 4                | 0      | 0.225                 | 2.475                  | 0.900                        |
| South Carolina | 2008 | 4,528,996  | R           | Legal   | Legal   |                 | 0         | 0         | 0                | 0      | 0.000                 | 0.000                  | 0.000                        |
| South Carolina | 2009 | 4,589,872  | R           | Legal   | Legal   |                 | 0         | 0         | 0                | 0      | 0.000                 | 0.000                  | 0.000                        |
| South Carolina | 2010 | 4,635,846  | R           | Legal   | Legal   |                 | 1         | 7         | 0                | 0      | 0.216                 | 1.510                  | 0.000                        |
| South Carolina | 2011 | 4,672,655  | R           | Legal   | Legal   |                 | 2         | 33        | 3                | 0      | 0.428                 | 7.062                  | 0.642                        |
| South Carolina | 2012 | 4,719,027  | R           | Legal   | Legal   |                 | 0         | 0         | 0                | 0      | 0.000                 | 0.000                  | 0.000                        |
| South Carolina | 2013 | 4,766,469  | R           | Legal   | Legal   |                 | 0         | 0         | 0                | 0      | 0.000                 | 0.000                  | 0.000                        |
| South Carolina | 2014 | 4,826,858  | R           | Legal   | Legal   |                 | 0         | 0         | 0                | 0      | 0.000                 | 0.000                  | 0.000                        |
| South Carolina | 2015 | 4,896,006  | R           | Legal   | Legal   |                 | 0         | 0         | 0                | 0      | 0.000                 | 0.000                  | 0.000                        |
| South Carolina | 2016 | 4,963,031  | R           | Legal   | Legal   |                 | 0         | 0         | 0                | 0      | 0.000                 | 0.000                  | 0.000                        |
| South Carolina | 2017 | 5,027,102  | R           | Legal   | Legal   |                 | 0         | 0         | 0                | 0      | 0.000                 | 0.000                  | 0.000                        |
| South Carolina | 2018 | 5,091,702  | R           | Legal   | Legal   |                 | 0         | 0         | 0                | 0      | 0.000                 | 0.000                  | 0.000                        |
| South Carolina | 2019 | 5,157,702  | R           | Legal   | Legal   |                 | 0         | 0         | 0                | 0      | 0.000                 | 0.000                  | 0.000                        |
| South Carolina | 2020 | 5,131,848  | R           | Legal   | Legal   |                 | 0         | 0         | 0                | 0      | 0.000                 | 0.000                  | 0.000                        |
| South Dakota   | 2005 | 775,493    | F           | Legal   | Legal   |                 | 0         | 0         | 0                | 0      | 0.000                 | 0.000                  | 0.000                        |

| State        | Year | Population | Legal Class | Def 1   | Def 2   | Number Licenses | Outbreaks | Illnesses | Hospitalizations | Deaths | Outbreak Rate Per 1MM | Illnesses Rate Per 1MM | Hospitalization Rate Per 1MM |
|--------------|------|------------|-------------|---------|---------|-----------------|-----------|-----------|------------------|--------|-----------------------|------------------------|------------------------------|
| South Dakota | 2006 | 783,033    | F           | Legal   | Legal   |                 | 0         | 0         | 0                | 0      | 0.000                 | 0.000                  | 0.000                        |
| South Dakota | 2007 | 791,623    | F           | Legal   | Legal   |                 | 0         | 0         | 0                | 0      | 0.000                 | 0.000                  | 0.000                        |
| South Dakota | 2008 | 799,124    | F           | Legal   | Legal   |                 | 0         | 0         | 0                | 0      | 0.000                 | 0.000                  | 0.000                        |
| South Dakota | 2009 | 807,067    | F           | Legal   | Legal   |                 | 0         | 0         | 0                | 0      | 0.000                 | 0.000                  | 0.000                        |
| South Dakota | 2010 | 816,193    | F           | Legal   | Legal   |                 | 0         | 0         | 0                | 0      | 0.000                 | 0.000                  | 0.000                        |
| South Dakota | 2011 | 823,740    | F           | Legal   | Legal   |                 | 0         | 0         | 0                | 0      | 0.000                 | 0.000                  | 0.000                        |
| South Dakota | 2012 | 833,859    | F           | Legal   | Legal   |                 | 0         | 0         | 0                | 0      | 0.000                 | 0.000                  | 0.000                        |
| South Dakota | 2013 | 842,751    | F           | Legal   | Legal   |                 | 0         | 0         | 0                | 0      | 0.000                 | 0.000                  | 0.000                        |
| South Dakota | 2014 | 849,670    | F           | Legal   | Legal   |                 | 0         | 0         | 0                | 0      | 0.000                 | 0.000                  | 0.000                        |
| South Dakota | 2015 | 854,663    | F           | Legal   | Legal   |                 | 0         | 0         | 0                | 0      | 0.000                 | 0.000                  | 0.000                        |
| South Dakota | 2016 | 863,693    | F           | Legal   | Legal   |                 | 0         | 0         | 0                | 0      | 0.000                 | 0.000                  | 0.000                        |
| South Dakota | 2017 | 873,732    | F           | Legal   | Legal   |                 | 0         | 0         | 0                | 0      | 0.000                 | 0.000                  | 0.000                        |
| South Dakota | 2018 | 879,386    | F           | Legal   | Legal   |                 | 0         | 0         | 0                | 0      | 0.000                 | 0.000                  | 0.000                        |
| South Dakota | 2019 | 887,127    | F           | Legal   | Legal   |                 | 0         | 0         | 0                | 0      | 0.000                 | 0.000                  | 0.000                        |
| South Dakota | 2020 | 887,799    | F           | Legal   | Legal   |                 | 0         | 0         | 0                | 0      | 0.000                 | 0.000                  | 0.000                        |
| Tennessee    | 2005 | 5,991,057  | I           | Illegal | Illegal |                 | 0         | 0         | 0                | 0      | 0.000                 | 0.000                  | 0.000                        |
| Tennessee    | 2006 | 6,088,766  | I           | Illegal | Illegal |                 | 0         | 0         | 0                | 0      | 0.000                 | 0.000                  | 0.000                        |
| Tennessee    | 2007 | 6,175,727  | I           | Illegal | Illegal |                 | 0         | 0         | 0                | 0      | 0.000                 | 0.000                  | 0.000                        |
| Tennessee    | 2008 | 6,247,411  | I           | Illegal | Illegal |                 | 0         | 0         | 0                | 0      | 0.000                 | 0.000                  | 0.000                        |
| Tennessee    | 2009 | 6,306,019  | H           | Legal   | Legal   |                 | 0         | 0         | 0                | 0      | 0.000                 | 0.000                  | 0.000                        |
| Tennessee    | 2010 | 6,355,518  | H           | Legal   | Legal   |                 | 1         | 3         | 0                | 0      | 0.157                 | 0.472                  | 0.000                        |
| Tennessee    | 2011 | 6,400,298  | H           | Legal   | Legal   |                 | 0         | 0         | 0                | 0      | 0.000                 | 0.000                  | 0.000                        |
| Tennessee    | 2012 | 6,455,752  | H           | Legal   | Legal   |                 | 0         | 0         | 0                | 0      | 0.000                 | 0.000                  | 0.000                        |
| Tennessee    | 2013 | 6,496,943  | H           | Legal   | Legal   |                 | 1         | 9         | 5                | 0      | 0.154                 | 1.385                  | 0.770                        |
| Tennessee    | 2014 | 6,544,617  | H           | Legal   | Legal   |                 | 0         | 0         | 0                | 0      | 0.000                 | 0.000                  | 0.000                        |
| Tennessee    | 2015 | 6,595,354  | H           | Legal   | Legal   |                 | 1         | 2         | 0                | 0      | 0.152                 | 0.303                  | 0.000                        |
| Tennessee    | 2016 | 6,651,277  | H           | Legal   | Legal   |                 | 0         | 0         | 0                | 0      | 0.000                 | 0.000                  | 0.000                        |
| Tennessee    | 2017 | 6,714,748  | H           | Legal   | Legal   |                 | 0         | 0         | 0                | 0      | 0.000                 | 0.000                  | 0.000                        |
| Tennessee    | 2018 | 6,778,180  | H           | Legal   | Legal   |                 | 1         | 17        | 7                | 0      | 0.148                 | 2.508                  | 1.033                        |
| Tennessee    | 2019 | 6,830,325  | H           | Legal   | Legal   |                 | 0         | 0         | 0                | 0      | 0.000                 | 0.000                  | 0.000                        |
| Tennessee    | 2020 | 6,925,619  | H           | Legal   | Legal   |                 | 0         | 0         | 0                | 0      | 0.000                 | 0.000                  | 0.000                        |
| Texas        | 2005 | 22,778,123 | F           | Legal   | Legal   | 22              | 0         | 0         | 0                | 0      | 0.000                 | 0.000                  | 0.000                        |
| Texas        | 2006 | 23,359,580 | F           | Legal   | Legal   | 13              | 0         | 0         | 0                | 0      | 0.000                 | 0.000                  | 0.000                        |
| Texas        | 2007 | 23,831,983 | F           | Legal   | Legal   | 17              | 0         | 0         | 0                | 0      | 0.000                 | 0.000                  | 0.000                        |

| State   | Year | Population | Legal Class | Def 1 | Def 2 | Number Licenses | Outbreaks | Illnesses | Hospitalizations | Deaths | Outbreak Rate Per 1MM | Illnesses Rate Per 1MM | Hospitalization Rate Per 1MM |
|---------|------|------------|-------------|-------|-------|-----------------|-----------|-----------|------------------|--------|-----------------------|------------------------|------------------------------|
| Texas   | 2008 | 24,309,039 | F           | Legal | Legal | 28              | 0         | 0         | 0                | 0      | 0.000                 | 0.000                  | 0.000                        |
| Texas   | 2009 | 24,801,761 | F           | Legal | Legal | 44              | 0         | 0         | 0                | 0      | 0.000                 | 0.000                  | 0.000                        |
| Texas   | 2010 | 25,241,897 | F           | Legal | Legal | 33              | 0         | 0         | 0                | 0      | 0.000                 | 0.000                  | 0.000                        |
| Texas   | 2011 | 25,645,504 | F           | Legal | Legal | 42              | 0         | 0         | 0                | 0      | 0.000                 | 0.000                  | 0.000                        |
| Texas   | 2012 | 26,084,120 | F           | Legal | Legal | 42              | 0         | 0         | 0                | 0      | 0.000                 | 0.000                  | 0.000                        |
| Texas   | 2013 | 26,479,646 | F           | Legal | Legal | 48              | 0         | 0         | 0                | 0      | 0.000                 | 0.000                  | 0.000                        |
| Texas   | 2014 | 26,963,092 | F           | Legal | Legal | 52              | 0         | 0         | 0                | 0      | 0.000                 | 0.000                  | 0.000                        |
| Texas   | 2015 | 27,468,531 | F           | Legal | Legal | 44              | 2         | 7         | 1                | 0      | 0.073                 | 0.255                  | 0.036                        |
| Texas   | 2016 | 27,914,064 | F           | Legal | Legal | 44              | 0         | 0         | 0                | 0      | 0.000                 | 0.000                  | 0.000                        |
| Texas   | 2017 | 28,291,024 | F           | Legal | Legal | 0               | 0         | 0         | 0                | 0      | 0.000                 | 0.000                  | 0.000                        |
| Texas   | 2018 | 28,624,564 | F           | Legal | Legal | 0               | 1         | 2         | 0                | 0      | 0.035                 | 0.070                  | 0.000                        |
| Texas   | 2019 | 28,986,794 | F           | Legal | Legal | 0               | 1         | 6         | 0                | 0      | 0.034                 | 0.207                  | 0.000                        |
| Texas   | 2020 | 29,232,474 | F           | Legal | Legal | 0               | 0         | 0         | 0                | 0      | 0.000                 | 0.000                  | 0.000                        |
| Utah    | 2005 | 2,457,719  | F           | Legal | Legal | 2               | 1         | 11        | 0                | 0      | 0.407                 | 4.476                  | 0.000                        |
| Utah    | 2006 | 2,525,507  | F           | Legal | Legal | 2               | 0         | 0         | 0                | 0      | 0.000                 | 0.000                  | 0.000                        |
| Utah    | 2007 | 2,597,746  | R           | Legal | Legal | 2               | 0         | 0         | 0                | 0      | 0.000                 | 0.000                  | 0.000                        |
| Utah    | 2008 | 2,663,029  | R           | Legal | Legal | 2               | 1         | 4         | 0                | 0      | 0.376                 | 1.502                  | 0.000                        |
| Utah    | 2009 | 2,723,421  | R           | Legal | Legal | 2               | 0         | 0         | 0                | 0      | 0.000                 | 0.000                  | 0.000                        |
| Utah    | 2010 | 2,775,413  | R           | Legal | Legal | 2               | 0         | 0         | 0                | 0      | 0.000                 | 0.000                  | 0.000                        |
| Utah    | 2011 | 2,814,797  | R           | Legal | Legal | 3               | 0         | 0         | 0                | 0      | 0.000                 | 0.000                  | 0.000                        |
| Utah    | 2012 | 2,854,146  | R           | Legal | Legal | 4               | 2         | 20        | 0                | 0      | 0.701                 | 7.007                  | 0.000                        |
| Utah    | 2013 | 2,898,773  | R           | Legal | Legal | 4               | 2         | 28        | 1                | 0      | 0.690                 | 9.659                  | 0.345                        |
| Utah    | 2014 | 2,938,327  | R           | Legal | Legal | 6               | 2         | 118       | 10               | 1      | 0.681                 | 40.159                 | 3.403                        |
| Utah    | 2015 | 2,983,626  | R           | Legal | Legal | 8               | 2         | 6         | 0                | 0      | 0.670                 | 2.011                  | 0.000                        |
| Utah    | 2016 | 3,044,241  | R           | Legal | Legal | 10              | 2         | 25        | 5                | 0      | 0.657                 | 8.212                  | 1.642                        |
| Utah    | 2017 | 3,103,540  | R           | Legal | Legal | 8               | 4         | 21        | 1                | 0      | 1.289                 | 6.766                  | 0.322                        |
| Utah    | 2018 | 3,155,153  | R           | Legal | Legal | 9               | 1         | 16        | 0                | 0      | 0.317                 | 5.071                  | 0.000                        |
| Utah    | 2019 | 3,203,383  | R           | Legal | Legal | 9               | 0         | 0         | 0                | 0      | 0.000                 | 0.000                  | 0.000                        |
| Utah    | 2020 | 3,283,785  | R           | Legal | Legal | 10              | 0         | 0         | 0                | 0      | 0.000                 | 0.000                  | 0.000                        |
| Vermont | 2005 | 621,215    | F           | Legal | Legal |                 | 0         | 0         | 0                | 0      | 0.000                 | 0.000                  | 0.000                        |
| Vermont | 2006 | 622,892    | F           | Legal | Legal |                 | 0         | 0         | 0                | 0      | 0.000                 | 0.000                  | 0.000                        |
| Vermont | 2007 | 623,481    | F           | Legal | Legal |                 | 0         | 0         | 0                | 0      | 0.000                 | 0.000                  | 0.000                        |
| Vermont | 2008 | 624,151    | F           | Legal | Legal |                 | 1         | 6         | 3                | 0      | 1.602                 | 9.613                  | 4.807                        |
| Vermont | 2009 | 624,817    | F           | Legal | Legal |                 | 0         | 0         | 0                | 0      | 0.000                 | 0.000                  | 0.000                        |

| State      | Year | Population | Legal Class | Def 1 | Def 2 | Number Licenses | Outbreaks | Illnesses | Hospitalizations | Deaths | Outbreak Rate Per 1MM | Illnesses Rate Per 1MM | Hospitalization Rate Per 1MM |
|------------|------|------------|-------------|-------|-------|-----------------|-----------|-----------|------------------|--------|-----------------------|------------------------|------------------------------|
| Vermont    | 2010 | 625,886    | F           | Legal | Legal |                 | 2         | 17        | 0                | 0      | 3.195                 | 27.161                 | 0.000                        |
| Vermont    | 2011 | 627,197    | F           | Legal | Legal |                 | 0         | 0         | 0                | 0      | 0.000                 | 0.000                  | 0.000                        |
| Vermont    | 2012 | 626,361    | F           | Legal | Legal |                 | 0         | 0         | 0                | 0      | 0.000                 | 0.000                  | 0.000                        |
| Vermont    | 2013 | 626,603    | F           | Legal | Legal |                 | 0         | 0         | 0                | 0      | 0.000                 | 0.000                  | 0.000                        |
| Vermont    | 2014 | 625,693    | F           | Legal | Legal |                 | 0         | 0         | 0                | 0      | 0.000                 | 0.000                  | 0.000                        |
| Vermont    | 2015 | 625,810    | F           | Legal | Legal |                 | 0         | 0         | 0                | 0      | 0.000                 | 0.000                  | 0.000                        |
| Vermont    | 2016 | 624,366    | F           | Legal | Legal |                 | 0         | 0         | 0                | 0      | 0.000                 | 0.000                  | 0.000                        |
| Vermont    | 2017 | 625,132    | F           | Legal | Legal |                 | 0         | 0         | 0                | 0      | 0.000                 | 0.000                  | 0.000                        |
| Vermont    | 2018 | 624,802    | F           | Legal | Legal |                 | 0         | 0         | 0                | 0      | 0.000                 | 0.000                  | 0.000                        |
| Vermont    | 2019 | 624,046    | F           | Legal | Legal |                 | 0         | 0         | 0                | 0      | 0.000                 | 0.000                  | 0.000                        |
| Vermont    | 2020 | 642,893    | F           | Legal | Legal |                 | 0         | 0         | 0                | 0      | 0.000                 | 0.000                  | 0.000                        |
| Virginia   | 2005 | 7,577,105  | H           | Legal | Legal |                 | 0         | 0         | 0                | 0      | 0.000                 | 0.000                  | 0.000                        |
| Virginia   | 2006 | 7,673,725  | H           | Legal | Legal |                 | 1         | 9         | 0                | 0      | 0.130                 | 1.173                  | 0.000                        |
| Virginia   | 2007 | 7,751,000  | H           | Legal | Legal |                 | 0         | 0         | 0                | 0      | 0.000                 | 0.000                  | 0.000                        |
| Virginia   | 2008 | 7,833,496  | H           | Legal | Legal |                 | 0         | 0         | 0                | 0      | 0.000                 | 0.000                  | 0.000                        |
| Virginia   | 2009 | 7,925,937  | H           | Legal | Legal |                 | 0         | 0         | 0                | 0      | 0.000                 | 0.000                  | 0.000                        |
| Virginia   | 2010 | 8,024,004  | H           | Legal | Legal |                 | 0         | 0         | 0                | 0      | 0.000                 | 0.000                  | 0.000                        |
| Virginia   | 2011 | 8,102,437  | H           | Legal | Legal |                 | 0         | 0         | 0                | 0      | 0.000                 | 0.000                  | 0.000                        |
| Virginia   | 2012 | 8,187,456  | H           | Legal | Legal |                 | 0         | 0         | 0                | 0      | 0.000                 | 0.000                  | 0.000                        |
| Virginia   | 2013 | 8,255,861  | H           | Legal | Legal |                 | 0         | 0         | 0                | 0      | 0.000                 | 0.000                  | 0.000                        |
| Virginia   | 2014 | 8,315,430  | H           | Legal | Legal |                 | 0         | 0         | 0                | 0      | 0.000                 | 0.000                  | 0.000                        |
| Virginia   | 2015 | 8,367,303  | H           | Legal | Legal |                 | 0         | 0         | 0                | 0      | 0.000                 | 0.000                  | 0.000                        |
| Virginia   | 2016 | 8,417,651  | H           | Legal | Legal |                 | 1         | 14        | 7                | 0      | 0.119                 | 1.663                  | 0.832                        |
| Virginia   | 2017 | 8,471,011  | H           | Legal | Legal |                 | 0         | 0         | 0                | 0      | 0.000                 | 0.000                  | 0.000                        |
| Virginia   | 2018 | 8,510,920  | H           | Legal | Legal |                 | 0         | 0         | 0                | 0      | 0.000                 | 0.000                  | 0.000                        |
| Virginia   | 2019 | 8,556,642  | H           | Legal | Legal |                 | 0         | 0         | 0                | 0      | 0.000                 | 0.000                  | 0.000                        |
| Virginia   | 2020 | 8,636,471  | H           | Legal | Legal |                 | 0         | 0         | 0                | 0      | 0.000                 | 0.000                  | 0.000                        |
| Washington | 2005 | 6,257,305  | R           | Legal | Legal |                 | 0         | 0         | 0                | 0      | 0.000                 | 0.000                  | 0.000                        |
| Washington | 2006 | 6,370,753  | R           | Legal | Legal |                 | 1         | 2         | 1                | 0      | 0.157                 | 0.314                  | 0.157                        |
| Washington | 2007 | 6,461,587  | R           | Legal | Legal |                 | 1         | 18        | 0                | 0      | 0.155                 | 2.786                  | 0.000                        |
| Washington | 2008 | 6,562,231  | R           | Legal | Legal |                 | 0         | 0         | 0                | 0      | 0.000                 | 0.000                  | 0.000                        |
| Washington | 2009 | 6,667,426  | R           | Legal | Legal |                 | 1         | 3         | 0                | 0      | 0.150                 | 0.450                  | 0.000                        |
| Washington | 2010 | 6,743,009  | R           | Legal | Legal |                 | 2         | 8         | 1                | 0      | 0.297                 | 1.186                  | 0.148                        |
| Washington | 2011 | 6,827,479  | R           | Legal | Legal |                 | 0         | 0         | 0                | 0      | 0.000                 | 0.000                  | 0.000                        |

| State         | Year | Population | Legal Class | Def 1   | Def 2   | Number Licenses | Outbreaks | Illnesses | Hospitalizations | Deaths | Outbreak Rate Per 1MM | Illnesses Rate Per 1MM | Hospitalization Rate Per 1MM |
|---------------|------|------------|-------------|---------|---------|-----------------|-----------|-----------|------------------|--------|-----------------------|------------------------|------------------------------|
| Washington    | 2012 | 6,898,599  | R           | Legal   | Legal   |                 | 0         | 0         | 0                | 0      | 0.000                 | 0.000                  | 0.000                        |
| Washington    | 2013 | 6,966,252  | R           | Legal   | Legal   |                 | 0         | 0         | 0                | 0      | 0.000                 | 0.000                  | 0.000                        |
| Washington    | 2014 | 7,057,531  | R           | Legal   | Legal   |                 | 0         | 0         | 0                | 0      | 0.000                 | 0.000                  | 0.000                        |
| Washington    | 2015 | 7,167,287  | R           | Legal   | Legal   |                 | 0         | 0         | 0                | 0      | 0.000                 | 0.000                  | 0.000                        |
| Washington    | 2016 | 7,299,961  | R           | Legal   | Legal   |                 | 1         | 3         | 3                | 0      | 0.137                 | 0.411                  | 0.411                        |
| Washington    | 2017 | 7,427,951  | R           | Legal   | Legal   |                 | 0         | 0         | 0                | 0      | 0.000                 | 0.000                  | 0.000                        |
| Washington    | 2018 | 7,526,793  | R           | Legal   | Legal   |                 | 1         | 2         | 0                | 0      | 0.133                 | 0.266                  | 0.000                        |
| Washington    | 2019 | 7,614,024  | R           | Legal   | Legal   |                 | 1         | 2         | 0                | 0      | 0.131                 | 0.263                  | 0.000                        |
| Washington    | 2020 | 7,724,031  | R           | Legal   | Legal   |                 | 0         | 0         | 0                | 0      | 0.000                 | 0.000                  | 0.000                        |
| West Virginia | 2005 | 1,820,492  | I           | Illegal | Illegal |                 | 0         | 0         | 0                | 0      | 0.000                 | 0.000                  | 0.000                        |
| West Virginia | 2006 | 1,827,912  | I           | Illegal | Illegal |                 | 0         | 0         | 0                | 0      | 0.000                 | 0.000                  | 0.000                        |
| West Virginia | 2007 | 1,834,052  | I           | Illegal | Illegal |                 | 0         | 0         | 0                | 0      | 0.000                 | 0.000                  | 0.000                        |
| West Virginia | 2008 | 1,840,310  | I           | Illegal | Illegal |                 | 0         | 0         | 0                | 0      | 0.000                 | 0.000                  | 0.000                        |
| West Virginia | 2009 | 1,847,775  | I           | Illegal | Illegal |                 | 0         | 0         | 0                | 0      | 0.000                 | 0.000                  | 0.000                        |
| West Virginia | 2010 | 1,854,265  | I           | Illegal | Illegal |                 | 0         | 0         | 0                | 0      | 0.000                 | 0.000                  | 0.000                        |
| West Virginia | 2011 | 1,856,606  | I           | Illegal | Illegal |                 | 0         | 0         | 0                | 0      | 0.000                 | 0.000                  | 0.000                        |
| West Virginia | 2012 | 1,857,446  | I           | Illegal | Illegal |                 | 0         | 0         | 0                | 0      | 0.000                 | 0.000                  | 0.000                        |
| West Virginia | 2013 | 1,854,768  | I           | Illegal | Illegal |                 | 0         | 0         | 0                | 0      | 0.000                 | 0.000                  | 0.000                        |
| West Virginia | 2014 | 1,850,569  | I           | Illegal | Illegal |                 | 0         | 0         | 0                | 0      | 0.000                 | 0.000                  | 0.000                        |
| West Virginia | 2015 | 1,843,332  | I           | Illegal | Illegal |                 | 0         | 0         | 0                | 0      | 0.000                 | 0.000                  | 0.000                        |
| West Virginia | 2016 | 1,832,435  | H           | Legal   | Legal   |                 | 0         | 0         | 0                | 0      | 0.000                 | 0.000                  | 0.000                        |
| West Virginia | 2017 | 1,818,683  | H           | Legal   | Legal   |                 | 0         | 0         | 0                | 0      | 0.000                 | 0.000                  | 0.000                        |
| West Virginia | 2018 | 1,805,953  | H           | Legal   | Legal   |                 | 0         | 0         | 0                | 0      | 0.000                 | 0.000                  | 0.000                        |
| West Virginia | 2019 | 1,795,263  | H           | Legal   | Legal   |                 | 0         | 0         | 0                | 0      | 0.000                 | 0.000                  | 0.000                        |
| West Virginia | 2020 | 1,791,420  | H           | Legal   | Legal   |                 | 0         | 0         | 0                | 0      | 0.000                 | 0.000                  | 0.000                        |
| Wisconsin     | 2005 | 5,546,166  | F           | Legal   | Legal   |                 | 0         | 0         | 0                | 0      | 0.000                 | 0.000                  | 0.000                        |
| Wisconsin     | 2006 | 5,577,655  | F           | Legal   | Legal   |                 | 0         | 0         | 0                | 0      | 0.000                 | 0.000                  | 0.000                        |
| Wisconsin     | 2007 | 5,610,775  | F           | Legal   | Legal   |                 | 0         | 0         | 0                | 0      | 0.000                 | 0.000                  | 0.000                        |
| Wisconsin     | 2008 | 5,640,996  | F           | Legal   | Legal   |                 | 0         | 0         | 0                | 0      | 0.000                 | 0.000                  | 0.000                        |
| Wisconsin     | 2009 | 5,669,264  | F           | Legal   | Legal   |                 | 1         | 52        | 1                | 0      | 0.176                 | 9.172                  | 0.176                        |
| Wisconsin     | 2010 | 5,690,538  | F           | Legal   | Legal   |                 | 0         | 0         | 0                | 0      | 0.000                 | 0.000                  | 0.000                        |
| Wisconsin     | 2011 | 5,705,840  | F           | Legal   | Legal   |                 | 1         | 16        | 1                | 0      | 0.175                 | 2.804                  | 0.175                        |
| Wisconsin     | 2012 | 5,720,825  | F           | Legal   | Legal   |                 | 0         | 0         | 0                | 0      | 0.000                 | 0.000                  | 0.000                        |
| Wisconsin     | 2013 | 5,738,012  | F           | Legal   | Legal   |                 | 1         | 3         | 1                | 0      | 0.174                 | 0.523                  | 0.174                        |

| State     | Year | Population | Legal Class | Def 1   | Def 2   | Number Licenses | Outbreaks | Illnesses | Hospitalizations | Deaths | Outbreak Rate Per 1MM | Illnesses Rate Per 1MM | Hospitalization Rate Per 1MM |
|-----------|------|------------|-------------|---------|---------|-----------------|-----------|-----------|------------------|--------|-----------------------|------------------------|------------------------------|
| Wisconsin | 2014 | 5,753,199  | F           | Legal   | Legal   |                 | 1         | 38        | 10               | 0      | 0.174                 | 6.605                  | 1.738                        |
| Wisconsin | 2015 | 5,762,927  | F           | Legal   | Legal   |                 | 0         | 0         | 0                | 0      | 0.000                 | 0.000                  | 0.000                        |
| Wisconsin | 2016 | 5,775,170  | F           | Legal   | Legal   |                 | 0         | 0         | 0                | 0      | 0.000                 | 0.000                  | 0.000                        |
| Wisconsin | 2017 | 5,793,147  | F           | Legal   | Legal   |                 | 0         | 0         | 0                | 0      | 0.000                 | 0.000                  | 0.000                        |
| Wisconsin | 2018 | 5,809,319  | F           | Legal   | Legal   |                 | 0         | 0         | 0                | 0      | 0.000                 | 0.000                  | 0.000                        |
| Wisconsin | 2019 | 5,824,581  | F           | Legal   | Legal   |                 | 0         | 0         | 0                | 0      | 0.000                 | 0.000                  | 0.000                        |
| Wisconsin | 2020 | 5,896,271  | F           | Legal   | Legal   |                 | 0         | 0         | 0                | 0      | 0.000                 | 0.000                  | 0.000                        |
| Wyoming   | 2005 | 514,157    | I           | Illegal | Illegal |                 | 2         | 14        | 2                | 0      | 3.890                 | 27.229                 | 3.890                        |
| Wyoming   | 2006 | 522,667    | I           | Illegal | Illegal |                 | 0         | 0         | 0                | 0      | 0.000                 | 0.000                  | 0.000                        |
| Wyoming   | 2007 | 534,876    | I           | Illegal | Illegal |                 | 0         | 0         | 0                | 0      | 0.000                 | 0.000                  | 0.000                        |
| Wyoming   | 2008 | 546,043    | I           | Illegal | Illegal |                 | 0         | 0         | 0                | 0      | 0.000                 | 0.000                  | 0.000                        |
| Wyoming   | 2009 | 559,851    | I           | Illegal | Illegal |                 | 0         | 0         | 0                | 0      | 0.000                 | 0.000                  | 0.000                        |
| Wyoming   | 2010 | 564,531    | I           | Illegal | Illegal |                 | 0         | 0         | 0                | 0      | 0.000                 | 0.000                  | 0.000                        |
| Wyoming   | 2011 | 567,491    | I           | Illegal | Illegal |                 | 0         | 0         | 0                | 0      | 0.000                 | 0.000                  | 0.000                        |
| Wyoming   | 2012 | 576,656    | H           | Legal   | Legal   |                 | 0         | 0         | 0                | 0      | 0.000                 | 0.000                  | 0.000                        |
| Wyoming   | 2013 | 582,620    | H           | Legal   | Legal   |                 | 0         | 0         | 0                | 0      | 0.000                 | 0.000                  | 0.000                        |
| Wyoming   | 2014 | 583,159    | H           | Legal   | Legal   |                 | 0         | 0         | 0                | 0      | 0.000                 | 0.000                  | 0.000                        |
| Wyoming   | 2015 | 586,389    | F           | Legal   | Legal   |                 | 0         | 0         | 0                | 0      | 0.000                 | 0.000                  | 0.000                        |
| Wyoming   | 2016 | 585,243    | F           | Legal   | Legal   |                 | 0         | 0         | 0                | 0      | 0.000                 | 0.000                  | 0.000                        |
| Wyoming   | 2017 | 579,994    | F           | Legal   | Legal   |                 | 0         | 0         | 0                | 0      | 0.000                 | 0.000                  | 0.000                        |
| Wyoming   | 2018 | 579,054    | F           | Legal   | Legal   |                 | 0         | 0         | 0                | 0      | 0.000                 | 0.000                  | 0.000                        |
| Wyoming   | 2019 | 580,116    | F           | Legal   | Legal   |                 | 0         | 0         | 0                | 0      | 0.000                 | 0.000                  | 0.000                        |
| Wyoming   | 2020 | 577,605    | F           | Legal   | Legal   |                 | 0         | 0         | 0                | 0      | 0.000                 | 0.000                  | 0.000                        |

**Table S2.** Data table of pasteurized milk-related outbreaks listing illnesses, hospitalizations, and deaths in the United States for the years 2005-2020.

| CDCID<br>Outbreak | State         | Year | Illnesses | Hospitalizations | Deaths | Agent/Pathogen Genus   | Pathogen species            |
|-------------------|---------------|------|-----------|------------------|--------|------------------------|-----------------------------|
| 256570            | Colorado      | 2005 | 200       | 1                | 0      | Campylobacter          | jejuni                      |
| 261955            | California    | 2006 | 1644      | 7                | 0      | Campylobacter          | jejuni                      |
| 258315            | Connecticut   | 2007 | 11        | 0                | 0      | Norovirus              | Genogroup II                |
| 259704            | Pennsylvania  | 2007 | 3         | 0                | 0      | Campylobacter          | unknown                     |
| 260049            | Massachusetts | 2007 | 5         | 5                | 3      | Listeria               | monocytogenes               |
| 4345              | Wyoming       | 2009 | 22        | 0                | 0      | Norovirus              | Genogroup II                |
| 3822              | Colorado      | 2010 | 3         | 0                | 0      | Campylobacter          | jejuni                      |
| 5290              | Florida       | 2010 | 4         | 0                | 0      | Salmonella             | unknown                     |
| 8270              | Pennsylvania  | 2011 | 16        | 7                | 1      | Yersinia               | enterocolitica              |
| 9044              | Washington    | 2011 | 3         | 3                | 0      | Escherichia            | coli, Shiga toxin-producing |
| 9805              | Kansas        | 2012 | 18        | 0                | 0      | Campylobacter          | jejuni                      |
| 14657             | Maryland      | 2012 | 6         | 0                | 0      | Other - Chemical/Toxin |                             |
| 15143             | Alaska        | 2013 | 5         | 1                | 0      | Campylobacter          | jejuni                      |
| 18884             | Florida       | 2014 | 6         | 0                | 0      | Cleaning agents        |                             |
| 19133             | Virginia      | 2014 | 32        | 0                | 0      | Other - Bacterium      |                             |
| 280366            | Florida       | 2018 | 4         | 0                | 0      | Unknown                |                             |
| 282360            | Nebraska      | 2018 | 20        | 1                | 0      | Salmonella             | enterica                    |
| 289346            | Pennsylvania  | 2019 | 109       | 7                | 0      | Yersinia               | enterocolitica              |





| State          | 2004 | 2005 | 2006 | 2007 | 2008 | 2009 | 2010 | 2011 | 2012 | 2013 | 2014 | 2015 | 2016 | 2017 | 2018 | 2019 | 2020 |
|----------------|------|------|------|------|------|------|------|------|------|------|------|------|------|------|------|------|------|
| New York       | F    | F    | F    | F    | F    | F    | F    | F    | F    | F    | F    | F    | F    | F    | F    | F    | F    |
| North Carolina | P    | P    | P    | P    | P    | P    | P    | P    | P    | P    | P    | P    | P    | P    | H    | H    | H    |
| North Dakota   | I    | I    | I    | I    | I    | I    | I    | I    | I    | H    | H    | H    | H    | H    | H    | H    | H    |
| Ohio           | I    | I    | H    | H    | H    | H    | H    | H    | H    | H    | H    | H    | H    | H    | H    | H    | H    |
| Oklahoma       | F    | F    | F    | F    | F    | F    | F    | F    | F    | F    | F    | F    | F    | F    | F    | F    | F    |
| Oregon         | R    | R    | R    | R    | R    | R    | R    | R    | R    | R    | R    | R    | R    | R    | R    | R    | R    |
| Pennsylvania   | R    | R    | R    | R    | R    | R    | R    | R    | R    | R    | R    | R    | R    | R    | R    | R    | R    |
| Rhode Island   | I    | I    | I    | I    | I    | I    | I    | I    | I    | I    | I    | I    | I    | I    | I    | I    | I    |
| South Carolina | F    | F    | F    | F    | R    | R    | R    | R    | R    | R    | R    | R    | R    | R    | R    | R    | R    |
| South Dakota   | F    | F    | F    | F    | F    | F    | F    | F    | F    | F    | F    | F    | F    | F    | F    | F    | F    |
| Tennessee      | I    | I    | I    | I    | I    | H    | H    | H    | H    | H    | H    | H    | H    | H    | H    | H    | H    |
| Texas          | F    | F    | F    | F    | F    | F    | F    | F    | F    | F    | F    | F    | F    | F    | F    | F    | F    |
| Utah           | F    | F    | F    | R    | R    | R    | R    | R    | R    | R    | R    | R    | R    | R    | R    | R    | R    |
| Vermont        | F    | F    | F    | F    | F    | F    | F    | F    | F    | F    | F    | F    | F    | F    | F    | F    | F    |
| Virginia       | H    | H    | H    | H    | H    | H    | H    | H    | H    | H    | H    | H    | H    | H    | H    | H    | H    |
| Washington     | R    | R    | R    | R    | R    | R    | R    | R    | R    | R    | R    | R    | R    | R    | R    | R    | R    |
| West Virginia  | I    | I    | I    | I    | I    | I    | I    | I    | I    | I    | I    | I    | H    | H    | H    | H    | H    |
| Wisconsin      | I    | F    | F    | F    | F    | F    | F    | F    | F    | F    | F    | F    | F    | F    | F    | F    | F    |
| Wyoming        | I    | I    | I    | I    | I    | I    | I    | I    | H    | H    | H    | F    | F    | F    | F    | F    | F    |

**Table S4.** State Level Data on Legal Status with Production and Population Estimates for 2018.

| State                | Year of Legal Status Change | Legal Status Code | Text description of legal access from RealMilk legal map (11 Nov 2022 version) with updates by personal communication                                                                                                          | Number Milk Cows 2018 (thousands) | 2018 State Milk Production (million pounds) | 2018 State Human Population |
|----------------------|-----------------------------|-------------------|--------------------------------------------------------------------------------------------------------------------------------------------------------------------------------------------------------------------------------|-----------------------------------|---------------------------------------------|-----------------------------|
| Alabama              | (P since 2004)              | P                 | Sales of raw pet milk are legal.                                                                                                                                                                                               | 5                                 | 73                                          | 4,891,628                   |
| Alaska               | Since 2004                  | H                 | Distribution of raw milk through herdshares is legal by regulation. State interprets regulation to mean no other raw dairy products can be distributed through herdshare agreements; 2021 raw dairy products through herdshare | <1                                | 3                                           | 736,624                     |
| Arizona              | Since 2004                  | R                 | Retail sales of raw milk are legal as well as sales of cream butter yogurt and kefir; a license is required. The state department of agriculture takes the position that herdshares are illegal.                               | 208                               | 4978                                        | 7,164,228                   |
| Arkansas             | Since 2004                  | F                 | On-farm sales of raw cow, goat, or sheep milk are legal; no license is required. Producers can sell up to 500 gallons per month.                                                                                               | 6                                 | 74                                          | 3,012,161                   |
| California           | Since 2004                  | R                 | Retail sales of raw milk are legal as well as sales of raw butter, cream, and kefir; a license is required.                                                                                                                    | 1,734                             | 40,413                                      | 39,437,463                  |
| Colorado             | Since 2005                  | H                 | Distribution of raw milk through herdshares is legal; producers must register with the state. Delivery from the farm is allowed by other herdshare co-owners.                                                                  | 176                               | 4,557                                       | 5,697,155                   |
| Connecticut          | Since 2004                  | H, R              | Retail sales of raw milk are legal; registration with the commissioner of agriculture is required. Herdshares are legal by statute.                                                                                            | 19                                | 427                                         | 3,574,561                   |
| Delaware             | P since 2022; I prior       | P                 | The sale or distribution of raw milk for human consumption is illegal. Sales of raw pet milk are legal if the producer is registered with the Delaware Department of Agriculture.                                              | 5                                 | 92                                          | 966,985                     |
| District of Columbia | I since 2004                | PNF               | The sale or distribution of raw milk for human consumption is illegal. National manufacturers sell raw pet dairy in retail stores.                                                                                             | Not Reported                      | Not Reported                                | 704,147                     |
| Florida              | P since 2004                | P                 | Sales of raw pet milk are legal; a Master Feed Registration is required, and sales of other raw pet dairy products by producers and distributors are allowed.                                                                  | 120                               | 2,381                                       | 21,254,926                  |

| State    | Year of Legal Status Change        | Legal Status Code | Text description of legal access from RealMilk legal map (11 Nov 2022 version) with updates by personal communication                                                                                                                                                                                                                                                                                                                                | Number Milk Cows 2018 (thousands) | 2018 State Milk Production (million pounds) | 2018 State Human Population |
|----------|------------------------------------|-------------------|------------------------------------------------------------------------------------------------------------------------------------------------------------------------------------------------------------------------------------------------------------------------------------------------------------------------------------------------------------------------------------------------------------------------------------------------------|-----------------------------------|---------------------------------------------|-----------------------------|
| Georgia  | P since 2004;<br>F as of July 2023 | P, F              | Sales of raw pet milk are legal. A commercial feed permit is required; no other raw dairy products can be sold under permit. As of 1 July 2023, on-farm access and delivery of raw milk are legal. <sup>d</sup>                                                                                                                                                                                                                                      | 83                                | 1,766                                       | 10,519,389                  |
| Hawaii   | I since 2004                       | NLH               | Raw milk sales for human consumption are illegal. There's no law on herdshares but the state claims they are illegal. Currently, no farmers are selling raw pet milk, and national manufacturers are no longer selling raw pet milk in retail stores. The statute on raw pet milk is unclear; however, the health department raided stores, seized products and banned raw pet milk sales in 2021.                                                   | 2                                 | 34                                          | 1,423,102                   |
| Idaho    | Since 2004                         | H, F, R           | Retail sales of raw milk are legal as well as sales of raw butter, yogurt, kefir, and unaged cheese; a permit is required. Herdshares are legal if the producer is registered and if the herd is no larger than 7 cows, 15 goats, or 15 sheep. Non-retail (on-farm) sales are legal if the producer is registered with the state and has no more than 3 cows, 7 goats, or 7 sheep.                                                                   | 609                               | 15,149                                      | 1,752,074                   |
| Illinois | 2016 (H prior)                     | F                 | On-farm sales of raw milk are legal; two permits are required: a dairy farm permit and a distribution point permit.                                                                                                                                                                                                                                                                                                                                  | 90                                | 1,878                                       | 12,724,685                  |
| Indiana  | H since 2004                       | NLH, P            | There's no law on herdshares; the state is aware that herdshares exist but has taken no action to stop them. Sales of raw pet dairy are legal.                                                                                                                                                                                                                                                                                                       | 83                                | 4,161                                       | 6,698,481                   |
| Iowa     | I since 2004                       | NLH, F, PNF       | Raw milk sales for human consumption are illegal. There's no law on herdshares but the state Department of Agriculture and Land Stewardship claims they are illegal. Currently, no farmers are selling raw pet milk, but national manufacturers are selling raw pet dairy in retail stores. As of 1 July 2023, legal access to raw milk and raw milk products is permitted on-farm for operations with 10 or fewer milk-producing cows. <sup>d</sup> | 220                               | 5,268                                       | 3,149,900                   |
| Kansas   | Since 2004                         | F                 | On-farm raw milk sales are legal as well as sales of raw butter, cream, yogurt, kefir, and unaged cheese; no permit is required.                                                                                                                                                                                                                                                                                                                     | 159                               | 3,708                                       | 2,912,748                   |

| State         | Year of Legal Status Change | Legal Status Code | Text description of legal access from RealMilk legal map (11 Nov 2022 version) with updates by personal communication                                                                                                                                                                                                                                                                                         | Number Milk Cows 2018 (thousands) | 2018 State Milk Production (million pounds) | 2018 State Human Population |
|---------------|-----------------------------|-------------------|---------------------------------------------------------------------------------------------------------------------------------------------------------------------------------------------------------------------------------------------------------------------------------------------------------------------------------------------------------------------------------------------------------------|-----------------------------------|---------------------------------------------|-----------------------------|
| Kentucky      | H 2011 (I prior)            | NLH               | There's no law on herdshares; the state is aware herdshares exist and has taken no action to stop them. Sales of raw goat milk are legal if the farmer has permit and if the consumer has written recommendation from physician.                                                                                                                                                                              | 55                                | 1,009                                       | 4,464,273                   |
| Louisiana     | I since 2004                | PNF               | Raw milk sales for human consumption are illegal. Currently, no farmers are selling pet milk, but national manufacturers are selling raw pet dairy in retail stores.                                                                                                                                                                                                                                          | 11                                | 152                                         | 4,664,450                   |
| Maine         | Since 2004                  | R                 | Retail sales of raw milk are legal as well as sales of raw butter, cream, yogurt, and kefir; a permit is required. 2017 Unlicensed, unregulated direct-to-consumer sales of all raw dairy are legal in towns that have passed the local food sovereignty ordinance.                                                                                                                                           | 30                                | 618                                         | 1,340,123                   |
| Maryland      | P 2016 (I prior)            | P                 | Raw milk sales are illegal by statute, and herdshare distribution is prohibited by regulation. Sales of raw pet milk are legal if the producer is registered with the state.                                                                                                                                                                                                                                  | 45                                | 925                                         | 6,042,153                   |
| Massachusetts | F since 2004?               | F                 | On-farm sales of raw milk are legal; a certificate of registration is required.                                                                                                                                                                                                                                                                                                                               | 11                                | 202                                         | 6,885,720                   |
| Michigan      | H 2013; I prior             | H                 | Herdshares are legal by written policy 1.40 which says that only raw milk can be distributed and that there is to be no enforcement of pasteurization requirements against herdshare operations distributing raw milk. There is a court case, however, where the court ruled that the farmer distributing raw cream and butter to any shareowners was not in contempt of court as violating state dairy laws. | 423                               | 11,168                                      | 9,987,286                   |
| Minnesota     | Since 2004                  | F                 | On farm sales of raw milk are legal as well as sales of raw cream; no permit is required. <sup>274</sup> The law states that the pasteurization requirement doesn't "apply to milk, cream, or skim milk occasionally secured or purchased for personal use by a consumer at the place or farm" where the milk is produced.                                                                                    | 452                               | 9,868                                       | 5,608,762                   |
| Mississippi   | F Since 2004!               | F <sub>g</sub>    | On-farm sales of goat milk legal; the producer may have only nine lactating goats at one time.                                                                                                                                                                                                                                                                                                                | 9                                 | 129                                         | 2,982,879                   |
| Missouri      | Since 2004                  | F, FM             | On-farm sales of raw milk are legal as well as sales of raw cream; producers without a permit may sell through delivery. Producers with a permit may                                                                                                                                                                                                                                                          | 83                                | 1,194                                       | 6,125,986                   |

| State         | Year of Legal Status Change | Legal Status Code | Text description of legal access from RealMilk legal map (11 Nov 2022 version) with updates by personal communication                                                                                                                                                                                                                                                                                                                                                                                                                                                                            | Number Milk Cows 2018 (thousands) | 2018 State Milk Production (million pounds) | 2018 State Human Population |
|---------------|-----------------------------|-------------------|--------------------------------------------------------------------------------------------------------------------------------------------------------------------------------------------------------------------------------------------------------------------------------------------------------------------------------------------------------------------------------------------------------------------------------------------------------------------------------------------------------------------------------------------------------------------------------------------------|-----------------------------------|---------------------------------------------|-----------------------------|
|               |                             |                   | additionally sell at farmers market and other direct-to-consumer venues, but no sales at retail stores.                                                                                                                                                                                                                                                                                                                                                                                                                                                                                          |                                   |                                             |                             |
| Montana       | H 2017;<br>I prior          | H                 | Sales of raw milk are legal to consumers who have purchased stock in the producer's dairy animals; sales are legal under the state's exemption to securities registration laws. Producers can sell securities to individual investors or to consumer cooperatives.<br>2021 raw milk and raw milk products for producers with <=5 lactating cows, <=10 lactating goats/sheep                                                                                                                                                                                                                      | 12                                | 274                                         | 1,061,818                   |
| Nebraska      | Since 2004                  | F                 | On-farm sales of raw milk are legal as well as sales of raw cream; no permit is required.                                                                                                                                                                                                                                                                                                                                                                                                                                                                                                        | 60                                | 1,440                                       | 1,925,512                   |
| Nevada        | I since 2004                | I                 | Raw milk sales are de facto illegal; sales are legal by statute but only if the county milk commission approves the producer. Only one county (Nye) has a milk commission and that county has not approved anyone. Raw pet milk sales are legal, but state law requires a toxic dye to denature the milk.                                                                                                                                                                                                                                                                                        | 32                                | 734                                         | 3,030,725                   |
| New Hampshire | Since 2004                  | F, FM, R          | Retail sales of raw milk are legal as well as sales of raw butter, cream, yogurt, and kefir; a permit is required, but it is left to the county or municipality to allow retail sales and sales to restaurants. Unregulated producers can sell direct to consumers on-farm, farm stands, or at farmers markets; they may sell up to 20 gallons of raw milk a day or the equivalent processed into raw butter, cream, yogurt, or kefir as well as cheese aged 60 days or more.<br>2022 legalized unregulated sale raw ice cream; producers must meet labeling requirements and cap on daily sales | 12                                | 249                                         | 1,355,064                   |
| New Jersey    | P 2021;<br>I prior          | P                 | Sales of raw pet milk are legal if the producer is registered with the state department of agriculture; raw milk distribution or sale for human consumption is illegal.                                                                                                                                                                                                                                                                                                                                                                                                                          | 6                                 | 110                                         | 8,891,730                   |
| New Mexico    | Since 2004                  | R                 | Retail sales of raw milk are legal as well as sales of raw cream; a permit is required. Municipalities can ban sales, which Albuquerque has done. There is no law on herdshares                                                                                                                                                                                                                                                                                                                                                                                                                  | 330                               | 8,285                                       | 2,093,754                   |
| New York      | Since 2004                  | F                 | On-farm sales of raw milk are legal; a permit is required.                                                                                                                                                                                                                                                                                                                                                                                                                                                                                                                                       | 623                               | 14,882                                      | 19,544,098                  |

| State          | Year of Legal Status Change       | Legal Status Code | Text description of legal access from RealMilk legal map (11 Nov 2022 version) with updates by personal communication                                                                                                                                                                                      | Number Milk Cows 2018 (thousands) | 2018 State Milk Production (million pounds) | 2018 State Human Population |
|----------------|-----------------------------------|-------------------|------------------------------------------------------------------------------------------------------------------------------------------------------------------------------------------------------------------------------------------------------------------------------------------------------------|-----------------------------------|---------------------------------------------|-----------------------------|
| North Carolina | P since 2004;<br><br>H since 2018 | H, P              | Distribution of any raw dairy product through herdshares is legal. Raw pet milk sales without a permit are legal; producers of pet milk must submit labels to the Department of Environment and Natural Resources.                                                                                         | 44                                | 937                                         | 10,391,358                  |
| North Dakota   | H 2013;<br>I prior                | H                 | Distribution of raw milk through herdshares is legal. Statute also allows for distribution of other raw dairy products, but the state department of agriculture contests this, claiming shareowners can only obtain raw milk. As of 1 July 2023, shareowners can obtain any raw milk product. <sup>d</sup> | 15                                | 334                                         | 760,062                     |
| Ohio           | H since 2006;<br>I prior          | H                 | Distribution of raw milk and raw milk products through herdshares is legal by court decision in Darke County and by policy for the rest of the state.                                                                                                                                                      | 259                               | 5,532                                       | 11,680,892                  |
| Oklahoma       | Since 2004                        | F                 | On-farm sales of raw milk are legal; statute allows ‘incidental sales’—the term is not defined—for raw cow milk or goat milk sales of no more than 100 gallons per month.                                                                                                                                  | 40                                | 725                                         | 3,943,488                   |
| Oregon         | R since 2004                      | F, R <sub>g</sub> | Retail sales of raw goat milk and sheep milk are legal as well as sales of raw cream; a permit is required. Unlicensed on-farm sales of raw cow, goat, and sheep milk are allowed if there are no more than three lactating cows, nine goats, and nine sheep on the premises.                              | 123                               | 2,531                                       | 4,183,538                   |
| Pennsylvania   | Since 2004                        | F, R              | Retail sales of raw milk are legal as well as sales in restaurants; a permit is required. Producers selling in retail stores must have mechanical bottling—no handcapping allowed. Consumers can bring their own containers for on-farm purchases.                                                         | 519                               | 10,665                                      | 12,809,107                  |
| Rhode Island   | I since 2004                      | PNF               | Raw milk sales are illegal. There is an exception for consumers purchasing raw goat milk with a physician’s prescription. Currently, no farmers are selling raw pet milk, but national manufacturers are selling raw pet dairy in retail stores.                                                           | <1                                | 12                                          | 1,059,338                   |
| South Carolina | R since 2008;<br>F2004-2007       | R                 | Retail sales of raw milk are legal; a permit is required. The state issued proposed regulations legalizing the sale of raw cream and raw buttermilk in 2020.                                                                                                                                               | 14                                | 242                                         | 5,091,702                   |

| State        | Year of Legal Status Change | Legal Status Code | Text description of legal access from RealMilk legal map (11 Nov 2022 version) with updates by personal communication                                                                                                                                                                                                                                                                                                                                                                                                                                                        | Number Milk Cows 2018 (thousands) | 2018 State Milk Production (million pounds) | 2018 State Human Population |
|--------------|-----------------------------|-------------------|------------------------------------------------------------------------------------------------------------------------------------------------------------------------------------------------------------------------------------------------------------------------------------------------------------------------------------------------------------------------------------------------------------------------------------------------------------------------------------------------------------------------------------------------------------------------------|-----------------------------------|---------------------------------------------|-----------------------------|
| South Dakota | Since 2004                  | F                 | On-farm sales of raw milk are legal as well as sales of raw cream; a permit is required. Delivery is also legal.                                                                                                                                                                                                                                                                                                                                                                                                                                                             | 121                               | 2,705                                       | 879,386                     |
| Tennessee    | H since 2009;<br>I prior    | H                 | Distribution of any raw dairy product through herdshares is legal. Sales of raw butter are legal by producers who have a dairy plant permit. Sales of raw pet dairy products are legal if the producer has a commercial feed permit.<br>2019 retail sale raw butter by licensed producers                                                                                                                                                                                                                                                                                    | 37                                | 634                                         | 6,778,180                   |
| Texas        | Since 2004                  | F                 | On-farm sales of raw milk are legal as well as sales of raw cream; a permit is required. State policy allows an agent for the consumer to deliver raw milk.<br>2021 delivery by licensed producers, raw milk products (buttermilk, cream, kefir)                                                                                                                                                                                                                                                                                                                             | 537                               | 12,852                                      | 28,624,564                  |
| Utah         | R since 2007;<br>F prior    | H, FM, R          | Retail sales of raw milk are legal if the licensed producer has a majority ownership in the retail store. Licensees may also sell raw milk, butter and cream on-farm as well as deliver and/or sell via refrigerated mobile unit. Unlicensed producers can sell up to 120 gallons of raw milk per month on the farm. Herdshares are legal by statute; producers with no more than 2 cows, 10 goats, and 10 sheep can distribute raw milk and any other raw dairy product to their shareowners. As of 1 July 2023, all raw dairy products can be sold at retail. <sup>d</sup> | 100                               | 2,322                                       | 3,155,153                   |
| Vermont      | F since 2004;               | F, FM             | On-farm sales of raw milk are legal; producers meeting basic requirements can sell up to 87.5 gallons a week without a permit. Producers meeting additional requirements can sell up to 350 gallons per week and can deliver as well as sell at farmers markets.<br><br>2019 raw milk delivery and farmers markets;<br>2021 raw milk by CSAs and 3 <sup>rd</sup> party farm stands                                                                                                                                                                                           | 127                               | 2,680                                       | 624,802                     |
| Virginia     | H since 2004                | HNL               | There's no law on herdshares; distribution of raw milk and raw products through herdshares is legal by policy of the Virginia Department of Agriculture and Consumer Services.                                                                                                                                                                                                                                                                                                                                                                                               | 83                                | 1,635                                       | 8,510,920                   |
| Washington   | Since 2004                  | R                 | Retail sales of raw milk are legal as well as sales of raw cream; a license is required, and sales to restaurants are also legal.                                                                                                                                                                                                                                                                                                                                                                                                                                            | 277                               | 6,736                                       | 7,526,793                   |



| State            | Year of Legal Status Change              | Legal Status Code | Text description of legal access from RealMilk legal map (11 Nov 2022 version) with updates by personal communication                                                                                                                                                                                                                                                                                                                                                                                                           | Number Milk Cows 2018 (thousands) | 2018 State Milk Production (million pounds) | 2018 State Human Population |
|------------------|------------------------------------------|-------------------|---------------------------------------------------------------------------------------------------------------------------------------------------------------------------------------------------------------------------------------------------------------------------------------------------------------------------------------------------------------------------------------------------------------------------------------------------------------------------------------------------------------------------------|-----------------------------------|---------------------------------------------|-----------------------------|
| West Virginia    | H since 2016;<br>I prior                 | H                 | Distribution of raw milk through herdshares is legal; herdshare producers must register with the state.                                                                                                                                                                                                                                                                                                                                                                                                                         | 7                                 | 111                                         | 1,805,953                   |
| Wisconsin        | F since 2005;<br>I prior                 | F                 | On-farm sales of raw milk are legal as 'incidental sales', which is defined as "not in the regular course of business" (the state has not clarified what the "regular course of business" is). Raw milk sales also legal to those individuals who have a bona fide ownership interest in the milk producer license; farmers with a milk producer license can issue stock to those wanting milk as long as the sole purpose of the business isn't to sell raw milk and the investors have the risk of loss for their investment. | 1,274                             | 30,579                                      | 5,809,319                   |
| Wyoming          | F since 2015;<br>H 2012-2014;<br>I prior | H, F, FM,<br>R    | On-farm sales of raw milk direct to the consumer are legal under the Wyoming Food Freedom Act. These unregulated sales can be on-farm, through delivery, and at farmers markets. Distribution of raw milk through herdshares is legal by regulation. As of 1 July 2023, any raw milk product can be sold at retail. <sup>d</sup>                                                                                                                                                                                                | 6                                 | 142                                         | 579,054                     |
| <b>US TOTALS</b> | <b>9,398</b>                             | <b>217,575</b>    | <b>326,838,199</b>                                                                                                                                                                                                                                                                                                                                                                                                                                                                                                              |                                   |                                             |                             |

Codes for legal status: **R**=retail; **F**=farm; **FM**=farmers market or other direct-to-consumer venues; **H**=herdshare legal; **NLH**=no law prohibiting herdshare; **HI**=herdshare illegal; **P**=pet food legal; **PNF**=pet food legal, no farmers selling; **I**=all sales illegal.

**Notes on data sources:** Data on legal status from Whitehead and Lake (2018), Supplementary Table 1 on legal status; 10.1371/currents.outbreaks.bae5a0fd685616839c9cf857792730d1; updates on state laws by Peter Kennedy (2023), personal communications, 15 Feb 2023, 27 June 2023; classifications on legal status by Weston A Price Foundation Real Milk Legal Map. Last updated on 11 November 2022. <https://www.realmilk.com/real-milk-legal-map/>; Census of Agriculture (2021) documents numbers of cows and production of fluid milk including milk consumed on farm by state (Table 8.3); US Census (2021) human populations by state

### 1.5 Autocorrelation Function Plots for Time-Series Counts

Autocorrelation function (ACF) plots were generated in Minitab v21.4 using the autocorrelation module (Minitab, 2022). The plots show the lags on the x-axis, which range from 1 to 4, and the ACF on the y-axis. The red horizontal lines show the 95% significance limits for autocorrelation. ACF plots were not generated for 14 states that reported no raw milk outbreaks over the entire period (AL, AR, DC, DE, HI, LA, MD, MS, NE, NJ, NV, RI, SD, and WV) as the time-series records were all zeros. Example plots are provided below. Additional plots will be provided upon request.

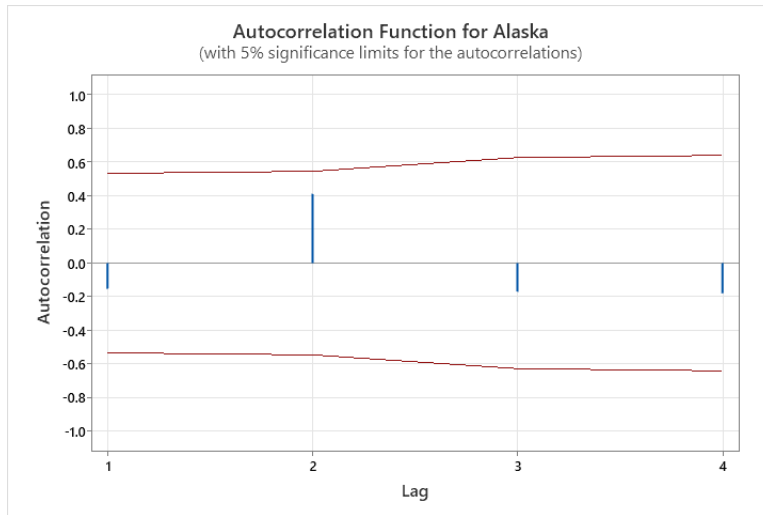

**Fig. S7.** Autocorrelation function (ACF) plot of raw milk outbreaks for Alaska.

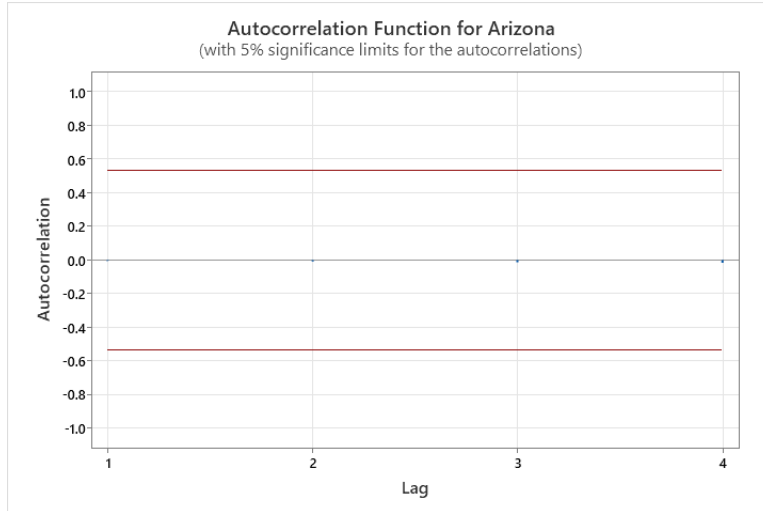

**Fig. S8.** Autocorrelation function (ACF) plot of raw milk outbreaks for Arizona.

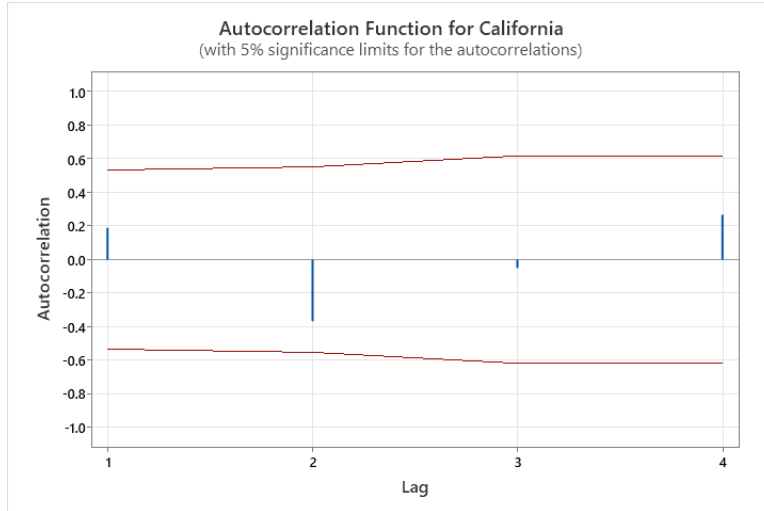

**Fig. S9.** Autocorrelation function (ACF) plot of raw milk outbreaks for California.

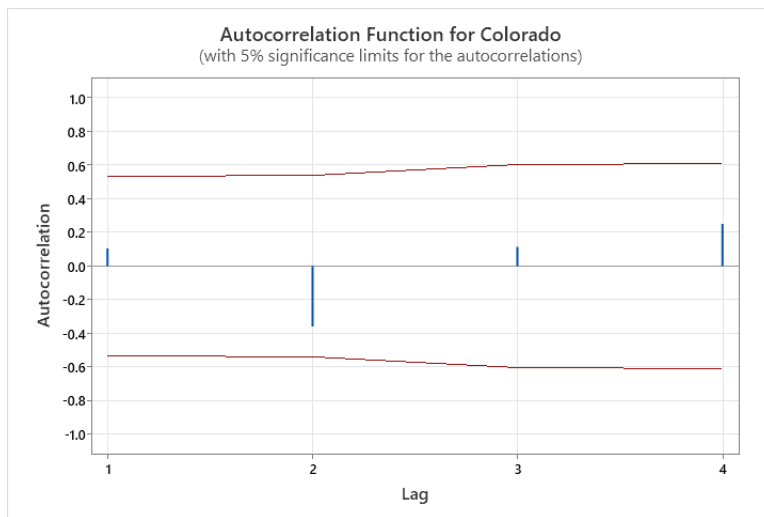

**Fig. S10.** Autocorrelation function (ACF) plot of raw milk outbreaks for Colorado.

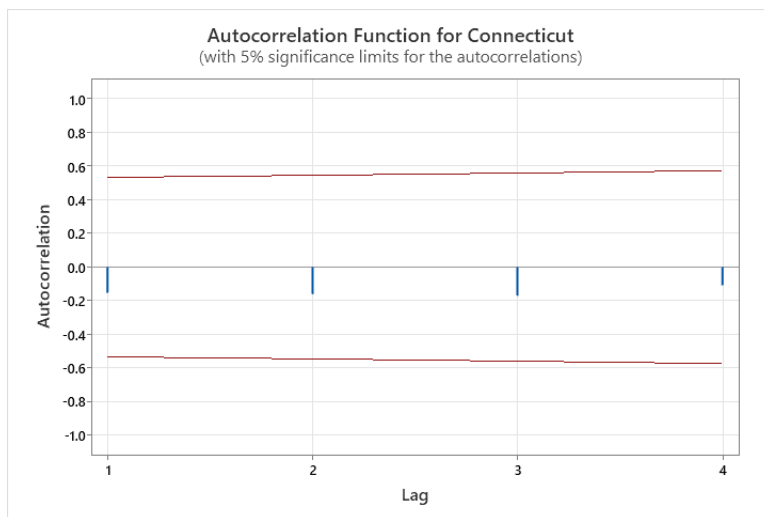

**Fig. S11.** Autocorrelation function (ACF) plot of raw milk outbreaks for Connecticut.

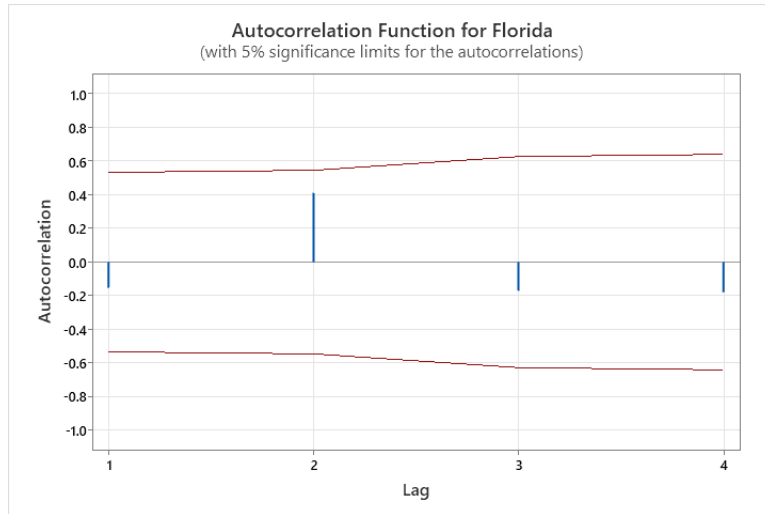

**Fig. S12.** Autocorrelation function (ACF) plot of raw milk outbreaks for Florida.

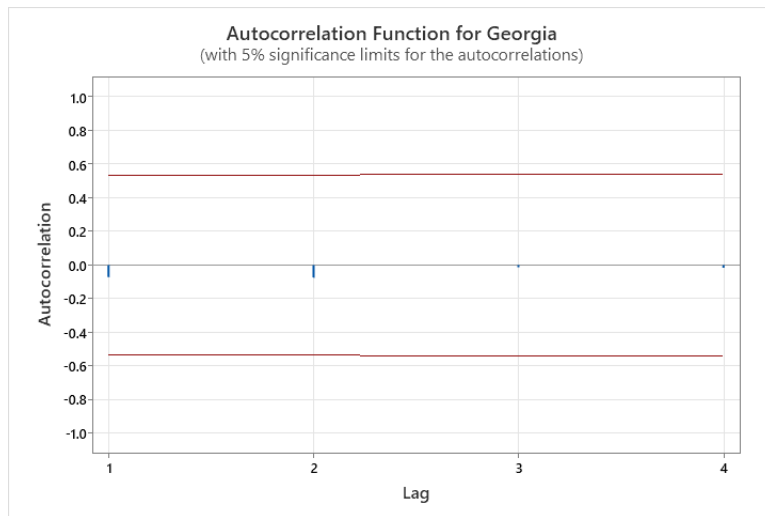

**Fig. S13.** Autocorrelation function (ACF) plot of raw milk outbreaks for Georgia.

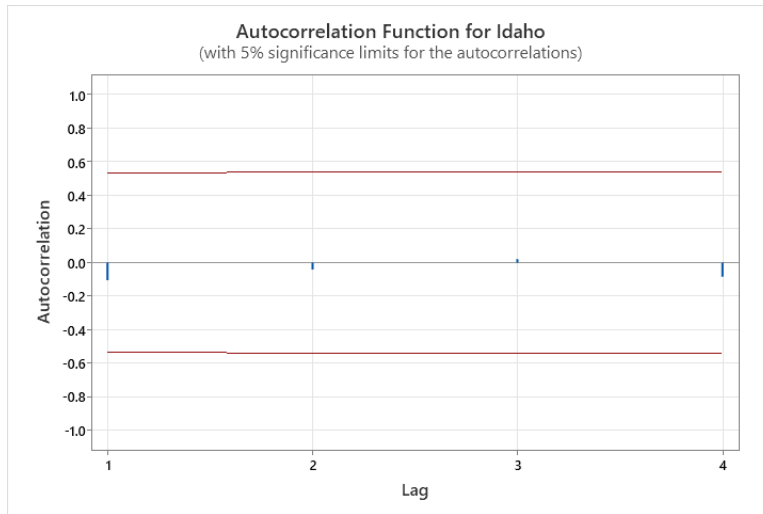

**Fig. S14.** Autocorrelation function (ACF) plot of raw milk outbreaks for Idaho.

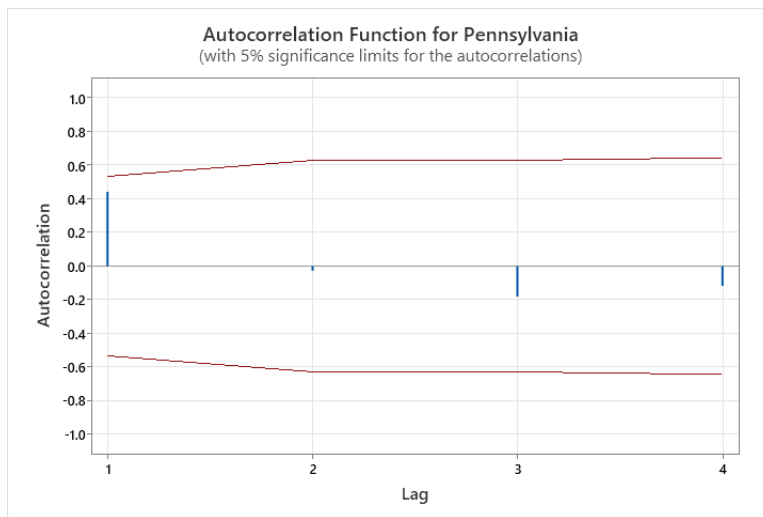

**Fig. S15.** Autocorrelation function (ACF) plot of raw milk outbreaks for Pennsylvania.
